# Supplementary material for: Compartment-specific mutational landscape of clonal hematopoiesis
Source: PubMed Central journal article supplement (PMC9613457; doi:10.1038/s41375-022-01700-3), 2022-09-21
Supplement: 41375_2022_1700_MOESM1_ESM.pdf [file 41375_2022_1700_MOESM1_ESM.pdf]

Supplemental material to Luise Hartmann, Judith S. Hecker, et al.:

**Compartment-specific mutational landscape of clonal hematopoiesis**

## Supplemental Methods

### Flow-sorting and genetic analyses of mature and precursor cell populations from BM samples

Antibodies used for cell sorting are listed in Supplemental Table 1.

After thawing BM samples, one fourth of the sample was stained with 100µl of an antibody mix for sorting mature cell populations (granulocytes, T lymphocytes, and B lymphocytes) along with CD34<sup>+</sup> cells (Supplemental Figure 1A). Dead cell exclusion was performed using DAPI 1µg/ml (BioLegend, #422801). The rest of the sample was sorted into fractions containing hematopoietic stem cells (HSC: lin<sup>-</sup>CD34<sup>+</sup>CD38<sup>-</sup>CD45RA<sup>-</sup>CD90<sup>+</sup>), common-myeloid progenitors (CMP: lin<sup>-</sup>CD34<sup>+</sup>CD38<sup>+</sup>CD45RA<sup>-</sup>CD123<sup>+</sup>), granulocyte-monocyte progenitors (GMP: lin<sup>-</sup>CD34<sup>+</sup>CD38<sup>+</sup>CD45RA<sup>+</sup>CD123<sup>+</sup>) and megakaryocyte-erythroid progenitors (MEP: lin<sup>-</sup>CD34<sup>+</sup>CD38<sup>+</sup>CD45RA<sup>-</sup>CD123<sup>-</sup>) (Supplemental Figure 1B). For this panel, dead cells were excluded using propidium iodide 0.4µg/ml (Sigma, #P4170). Sorting was performed using a BD FACS Aria III cell sorter and a 100µm nozzle.

DNA from flow-sorted cells (9.000-200.000 cells per population) was isolated using the QIAamp DNA Micro kit (Qiagen, Hilden, Germany). A custom unique molecular identifier-based QIAseq gene panel (Qiagen) targeting *ASXL1* exon 13 was used for library preparation, and sequencing was performed on a MiSeq instrument (Illumina, San Diego, USA). Variants were detected using the QIAGEN CLC Genomics Workbench. VAFs within flow-sorted cell populations were compared using the Friedman test followed by Dunn's multiple comparison test. *ASXL1* mutation VAFs in each flow-sorted population were compared to the same individual's bulk BM cells using Fisher's test, with multiple testing correction using the Benjamini-Hochberg procedure.

## Supplemental Tables

### Supplemental Table 1: List of antibodies used for FACS sorting of mature and progenitor BM cell populations.

| Panel      | Antibody     | Conjugate   | Dilution | Company         | Catalogue Number |
|------------|--------------|-------------|----------|-----------------|------------------|
| Mature     | Anti-CD3     | APC-Cy7     | 1:30     | BioLegend       | 344818           |
| Mature     | Anti-CD15    | FITC        | 1:10     | Beckman Coulter | B36298           |
| Mature     | Anti-CD19    | PE          | 1:30     | BioLegend       | 302208           |
| Mature     | Anti-CD34    | PE-Cy7      | 1:30     | BioLegend       | 343616           |
| Mature     | Anti-CD45    | APC         | 1:100    | eBioscience     | 17-0459-42       |
| Progenitor | Anti-CD4     | biotin      | 1:100    | BioLegend       | 300504           |
| Progenitor | Anti-CD8a    | biotin      | 1:100    | BioLegend       | 301004           |
| Progenitor | Anti-CD15    | biotin      | 1:100    | BioLegend       | 301914           |
| Progenitor | Anti-CD19    | biotin      | 1:100    | BioLegend       | 302204           |
| Progenitor | Anti-CD34    | FITC        | 1:15     | BD Pharmingen   | 555821           |
| Progenitor | Anti-CD38    | APC         | 1:25     | BD Biosciences  | 345807           |
| Progenitor | Anti-CD45    | PerCP-Cy5.5 | 1:100    | BioLegend       | 304028           |
| Progenitor | Anti-CD45RA  | PE-Cy7      | 1:20     | BD Biosciences  | 560675           |
| Progenitor | Anti-CD90    | PE          | 1:25     | BD Biosciences  | 555596           |
| Progenitor | Anti-CD123   | BV421       | 1:25     | BioLegend       | 306018           |
| Progenitor | Anti-CD235a  | biotin      | 1:100    | Invitrogen      | 13-9987-80       |
| Progenitor | Straptavidin | APC-Cy7     | 1:100    | BioLegend       | 405208           |

**Supplemental Table 2: Variants identified in individuals with clonal hematopoiesis.**

| Subject | Gene   | Variant                                           | Mutation type | VAF [%] | Specimen |
|---------|--------|---------------------------------------------------|---------------|---------|----------|
| UPN_1   | ASXL1  | NM_015338.6:c.2036dup;p.(Gly680Argfs*38)          | InDel         | 3.71    | BM       |
| UPN_1   | ASXL1  | NM_015338.6:c.2385del;p.(Trp796Glyfs*22)          | InDel         | 5.93    | BM       |
| UPN_1   | STAT3  | NM_139276.2:c.1940A>T;p.(Asn647Ile)               | Missense      | 1.79    | BM       |
| UPN_1   | TET2   | NM_001127208.2:c.5760A>T;p.(Lys1920Asn)           | Missense      | 4.75    | BM       |
| UPN_1   | U2AF1  | NM_001025203.1:c.470A>C p.(Gln157Pro)             | Missense      | 9.73    | BM       |
| UPN_10  | BCORL1 | NM_021946.4:c.4013G>A;p.(Arg1338Gln)              | Missense      | 6.39    | BM       |
| UPN_10  | RAD21  | NM_006265.3:c.65A>G;p.(His22Arg)                  | Missense      | 4.49    | BM       |
| UPN_100 | ZBTB7A | NM_015898.4:c.149C>T;p.(Ser50Leu)                 | Missense      | 3.18    | BM       |
| UPN_11  | BCORL1 | NM_021946.4:c.4853+1G>C;p.?                       | Splice site   | 10.86   | BM       |
| UPN_12  | DNMT3A | NM_175629.2:c.2567_2568delAG;p.(Glu856Glyfs*7)    | InDel         | 1.56    | PB       |
| UPN_12  | TET2   | NM_001127208.2:c.3954+5G>A;p.?                    | Splice site   | 1.13    | PB       |
| UPN_13  | DNMT3A | NM_175629.2:c.2393T>C;p.(Leu798Pro)               | Missense      | 1.00    | BM       |
| UPN_13  | TET2   | NM_001127208.2:c.5582G>A;p.(Gly1861Glu)           | Missense      | 4.66    | BM       |
| UPN_14  | DNMT3A | NM_175629.2:c.2339T>C;p.(Ile780Thr)               | Missense      | 1.14    | BM       |
| UPN_14  | TET2   | NM_001127208.2:c.5686A>G;p.(Arg1896Gly)           | Missense      | 5.34    | BM       |
| UPN_15  | DNMT3A | NM_175629.2:c.1123-2A>G;p.?                       | Splice site   | 23.6    | BM       |
| UPN_15  | TET2   | NM_001127208.2:c.4079T>G;p.(Leu1360Arg)           | Missense      | 1.19    | BM       |
| UPN_16  | DNMT3A | NM_175629.2:c.2106T>G;p.(Asp702Glu)               | Missense      | 3.59    | BM       |
| UPN_16  | IDH2   | NM_002168.3:c.678+1G>T;p.?                        | Splice site   | 1.07    | BM       |
| UPN_16  | TET2   | NM_001127208.2:c.1842dup;p.(Leu615Alafs*23)       | InDel         | 1.18    | BM       |
| UPN_17  | DNMT3A | NM_175629.2:c.1940T>G;p.(Leu647Arg)               | Missense      | 4.47    | BM       |
| UPN_17  | TET2   | NM_001127208.2:c.4136C>A;p.(Ala1379Asp)           | Missense      | 2.42    | BM       |
| UPN_17  | TET2   | NM_001127208.2:c.3116C>A;p.(Ser1039*)             | Nonsense      | 2.81    | BM       |
| UPN_18  | DNMT3A | NM_175629.2:c.2092T>G; p.(Trp698Gly)              | Missense      | 5.77    | PB       |
| UPN_19  | DNMT3A | NM_175629.2:c.2195T>C; p.(Phe732Ser)              | Missense      | 1.15    | PB       |
| UPN_2   | ASXL1  | NM_015338.6:c.2083C>T;p.(Gln695*)                 | Nonsense      | 1.29    | BM       |
| UPN_2   | DNMT3A | NM_175629.2:c.2141C>G;p.(Ser714Cys)               | Missense      | 1.08    | BM       |
| UPN_2   | JAK2   | NM_004972.3:c.1849G>T, p.(Val617Phe)              | Missense      | 5.96    | BM       |
| UPN_20  | DNMT3A | NM_175629.2:c.2591T>A; p.(Met864Lys)              | Missense      | 21.29   | PB       |
| UPN_201 | DNMT3A | NM_175629.2:c.776delC;p.(Ala259Valfs*57)          | InDel         | 1.53    | BM       |
| UPN_201 | DNMT3A | NM_175629.2:c.942G>A;p.(Trp314*)                  | Nonsense      | 5.39    | BM       |
| UPN_201 | TET2   | NM_001127208.2:c.5618T>C;p.(Ile1873Thr)           | Missense      | 2.78    | BM       |
| UPN_204 | TET2   | NM_001127208.2:c.3594+5G>T;p.?                    | Splice site   | 2.90    | BM       |
| UPN_204 | TET2   | NM_001127208.2:c.4585C>T;p.(Gln1529*)             | Nonsense      | 2.44    | BM       |
| UPN_205 | DNMT3A | NM_175629.2:c.1506del p.(Thr503Profs*148)         | InDel         | 4.28    | BM       |
| UPN_205 | NFE2   | NM_001136023.3:c.814C>T;p.(Arg272*)               | Nonsense      | 4.31    | BM       |
| UPN_206 | DNMT3A | NM_175629.2:c.2408+6T>G;p.?                       | Splice site   | 1.41    | BM       |
| UPN_208 | DNMT3A | NM_175629.2:c.2204A>G;p.(Tyr735Cys)               | Missense      | 1.24    | BM       |
| UPN_21  | DNMT3A | NM_175629.2:c.2047_2056del; p.(Tyr683Thrfs*19)    | InDel         | 3.41    | PB       |
| UPN_213 | TET2   | NM_001127208.2:c.4791_4792del;p.(Phe1597Leufs*16) | InDel         | 1.39    | BM       |
| UPN_213 | TET2   | NM_001127208.2:c.444_447del;p.(Lys148Asnfs*3)     | InDel         | 2.12    | BM       |
| UPN_214 | PPM1D  | NM_003620.4:c.1654C>T;p.(Arg552*)                 | Nonsense      | 10.63   | BM       |

| Subject | Gene          | Variant                                           | Mutation type | VAF [%] | Specimen |
|---------|---------------|---------------------------------------------------|---------------|---------|----------|
| UPN_216 | <i>PPM1D</i>  | NM_003620.4:c.1654C>T;p.(Arg552*)                 | Nonsense      | 2.00    | BM       |
| UPN_218 | <i>DNMT3A</i> | NM_175629.2:c.2086del;p.(Gln696Argfs*9)           | InDel         | 1.16    | BM       |
| UPN_22  | <i>DNMT3A</i> | NM_175629.2:c.2711C>T;p.(Pro904Leu)               | Missense      | 6.64    | BM       |
| UPN_220 | <i>DNMT3A</i> | NM_175629.2:c.2711C>T;p.(Pro904Leu)               | Missense      | 1.16    | BM       |
| UPN_222 | <i>TET2</i>   | NM_001127208.2:c.2340_2343del;p.(Val781Lysfs*31)  | InDel         | 1.77    | BM       |
| UPN_223 | <i>DNMT3A</i> | NM_175629.2: c.2645G>A p.(Arg882His)              | Missense      | 3.04    | BM       |
| UPN_225 | <i>DNMT3A</i> | NM_175629.2:c.1674T>G;p.(Phe558Leu)               | Missense      | 1.28    | BM       |
| UPN_225 | <i>TET2</i>   | NM_001127208.2:c.1441C>T;p.(Gln481*)              | Nonsense      | 1.30    | BM       |
| UPN_226 | <i>ASXL1</i>  | NM_015338.6:c.2179G>T;p.(Glu727*)                 | Nonsense      | 2.67    | BM       |
| UPN_227 | <i>PPM1D</i>  | NM_003620.4:c.1709C>G;p.(Ser570*)                 | Nonsense      | 1.18    | BM       |
| UPN_23  | <i>DNMT3A</i> | NM_175629.2:c.1506delT; p.(Thr503Profs*148)       | InDel         | 4.73    | PB       |
| UPN_231 | <i>DNMT3A</i> | NM_175629.2:c.2339T>C;p.(Ile780Thr)               | Missense      | 1.64    | BM       |
| UPN_231 | <i>DNMT3A</i> | NM_175629.2:c.2408G>A;p.(Arg803Lys)               | Missense      | 1.79    | BM       |
| UPN_231 | <i>DNMT3A</i> | NM_175629.2:c.842_855del;p.(Glu281Glyfs*38)       | InDel         | 3.98    | BM       |
| UPN_232 | <i>ASXL1</i>  | NM_015338.6:c.1934dup;p.(Gly646Trpfs*12)          | InDel         | 1.20    | BM       |
| UPN_232 | <i>DNMT3A</i> | NM_175629.2:c.1603T>C;p.(Ser535Pro)               | Missense      | 2.88    | BM       |
| UPN_232 | <i>TET2</i>   | NM_001127208.2:c.3765C>A;p.(Tyr1255*)             | Nonsense      | 1.45    | BM       |
| UPN_233 | <i>DNMT3A</i> | NM_175629.2:c.2207G>A;p.(Arg736His)               | Missense      | 6.75    | BM       |
| UPN_235 | <i>U2AF1</i>  | NM_001025203.1:c.470A>G p.(Gln157Arg)             | Missense      | 2.07    | BM       |
| UPN_235 | <i>WT1</i>    | NM_001198551.1:c.473G>A;p.(Arg158His)             | Missense      | 2.86    | BM       |
| UPN_238 | <i>DNMT3A</i> | NM_175629.2:c.1123-1G>C;p.?                       | Splice site   | 8.24    | BM       |
| UPN_24  | <i>DNMT3A</i> | NM_175629.2:c.1258A>T;p.(Lys420*)                 | Nonsense      | 3.99    | BM       |
| UPN_242 | <i>ASXL1</i>  | NM_015338.6:c.2885_2886del;p.(Val962Alafs*7)      | InDel         | 1.87    | BM       |
| UPN_243 | <i>TET2</i>   | NM_001127208.2:c.2919C>A;p.(Cys973*)              | Nonsense      | 1.89    | BM       |
| UPN_245 | <i>TP53</i>   | NM_000546.5:c.623A>G;p.(Asp208Gly)                | Missense      | 1.35    | BM       |
| UPN_248 | <i>ASXL1</i>  | NM_015338.6:c.2258_2259dup;p.(Thr754Profs*19)     | InDel         | 4.87    | BM       |
| UPN_248 | <i>SH2B3</i>  | NM_005475.2:c.1522dup;p.(Arg508Profs*38)          | InDel         | 40.42   | BM       |
| UPN_248 | <i>TET2</i>   | NM_001127208.2:c.5165del;p.(Pro1722Leufs*23)      | InDel         | 30.10   | BM       |
| UPN_248 | <i>TET2</i>   | NM_001127208.2:c.5481_5482del;p.(Gln1828Alafs*17) | InDel         | 32.3    | BM       |
| UPN_25  | <i>DNMT3A</i> | NM_175629.2:c.994G>A;p.(Gly332Arg)                | Missense      | 2.30    | BM       |
| UPN_250 | <i>TET2</i>   | NM_001127208.2:c.2375C>A;p.(Ser792*)              | Nonsense      | 1.10    | BM       |
| UPN_251 | <i>TET2</i>   | NM_001127208.2:c.5618T>C;p.(Ile1873Thr)           | Missense      | 1.15    | BM       |
| UPN_251 | <i>DNMT3A</i> | NM_175629.2:c.2530A>G;p.(Lys844Glu)               | Missense      | 1.45    | BM       |
| UPN_252 | <i>SF3B1</i>  | NM_012433.3c.1986C>G;p.(His662Gln)                | Missense      | 1.42    | BM       |
| UPN_252 | <i>TET2</i>   | NM_001127208.2:c.5686A>T;p.(Arg1896Trp)           | Missense      | 2.10    | BM       |
| UPN_254 | <i>SRSF2</i>  | NM_003016.4:c.242A>T;p.(Asp81Val)                 | Missense      | 3.20    | BM       |
| UPN_254 | <i>TET2</i>   | NM_001127208.2:c.5650A>G;p.(Thr1884Ala)           | Missense      | 43.88   | BM       |
| UPN_255 | <i>PIGA</i>   | NM_002641.3:c.217G>A;p.(Ala73Thr)                 | Missense      | 4.95    | BM       |
| UPN_26  | <i>DNMT3A</i> | NM_175629.2:c.2332G>A;p.(Val778Met)               | Missense      | 5.07    | BM       |
| UPN_266 | <i>DNMT3A</i> | NM_175629.2:c.2207G>A;p.(Arg736His)               | Missense      | 7.17    | BM       |
| UPN_267 | <i>DNMT3A</i> | NM_175629.2:c.1238del;p.(Gly413Alafs*238)         | InDel         | 1.00    | BM       |
| UPN_27  | <i>DNMT3A</i> | NM_175629.2:c.1271del;p.(Pro424Hisfs*227)         | InDel         | 1.49    | BM       |
| UPN_272 | <i>SRP72</i>  | NM_006947.3:c.869A>G;p.(Asn290Ser)                | Missense      | 3.16    | PB       |
| UPN_275 | <i>DNMT3A</i> | NM_175629.2:c.2657del;p.(Gln886Argfs*20)          | InDel         | 1.94    | PB       |

| Subject | Gene          | Variant                                         | Mutation type | VAF [%] | Specimen |
|---------|---------------|-------------------------------------------------|---------------|---------|----------|
| UPN_276 | <i>DNMT3A</i> | NM_175629.2:c.1238dup;p.(Phe414Leufs*7)         | InDel         | 1.42    | PB       |
| UPN_28  | <i>DNMT3A</i> | NM_175629.2:c.2711C>T;p.(Pro904Leu)             | Missense      | 5.33    | BM       |
| UPN_280 | <i>PPM1D</i>  | NM_003620.4:c.1332_1335del;p.(Phe445Glnfs*5)    | InDel         | 1.24    | PB       |
| UPN_282 | <i>DNMT3A</i> | NM_175629.2:c.2190_2215del;p.(Phe731*)          | InDel         | 10.81   | PB       |
| UPN_283 | <i>DNMT3A</i> | NM_175629.2:c.2207G>A;p.(Arg736His)             | Missense      | 5.68    | PB       |
| UPN_283 | <i>SF3B1</i>  | NM_012433.3:c.1997A>G p.(Lys666Arg)             | Missense      | 2.69    | PB       |
| UPN_288 | <i>DNMT3A</i> | NM_175629.2:c.1903C>T;p.(Arg635Trp)             | Missense      | 1.45    | PB       |
| UPN_288 | <i>DNMT3A</i> | NM_175629.2:c.2086C>T;p.(Gln696*)               | Nonsense      | 2.60    | PB       |
| UPN_29  | <i>DNMT3A</i> | NM_175629.2:c.2322+2T>C;p.?                     | Splice site   | 1.35    | PB       |
| UPN_291 | <i>DNMT3A</i> | NM_175629.2:c.2245C>T;p.(Arg749Cys)             | Missense      | 1.64    | PB       |
| UPN_291 | <i>DNMT3A</i> | NM_175629.2:c.1851+1G>A;p.?                     | Splice site   | 2.03    | PB       |
| UPN_3   | <i>ASXL1</i>  | NM_015338.6:c.2954_2957del;p.(Ile985Thrfs*7)    | InDel         | 4.73    | BM       |
| UPN_30  | <i>DNMT3A</i> | NM_175629.2:c.1948C>G;p.(Leu650Val)             | Missense      | 1.06    | PB       |
| UPN_31  | <i>DNMT3A</i> | NM_175629.2:c.1904G>A;p.(Arg635Gln)             | Missense      | 6.54    | PB       |
| UPN_32  | <i>DNMT3A</i> | NM_175629.2:c.2204A>G;p.(Tyr735Cys)             | Missense      | 2.65    | PB       |
| UPN_33  | <i>DNMT3A</i> | NM_175629.2:c.2330C>G;p.(Pro777Arg)             | Missense      | 1.32    | BM       |
| UPN_34  | <i>DNMT3A</i> | NM_175629.2:c.2393T>A, p.(Leu798His)            | Missense      | 4.37    | BM       |
| UPN_35  | <i>DNMT3A</i> | NM_175629.2:c.2401A>G; p.(Met801Val)            | Missense      | 12.06   | BM       |
| UPN_36  | <i>DNMT3A</i> | NM_175629.2:c.1015-2A>G;p.?                     | Splice site   | 4.76    | BM       |
| UPN_37  | <i>DNMT3A</i> | NM_175629.2:c.1532G>A;p.(Gly511Glu)             | Missense      | 1.49    | BM       |
| UPN_38  | <i>DNMT3A</i> | NM_175629.2:c.2185C>T;p.(Arg729Trp)             | Missense      | 8.48    | BM       |
| UPN_39  | <i>DNMT3A</i> | NM_175629.2:c.2644C>T;p.(Arg882Cys)             | Missense      | 1.06    | BM       |
| UPN_4   | <i>ASXL1</i>  | NM_015338.5:c.2512_2537dup; p.(Ser846Argfs*5)   | InDel         | 11.42   | PB       |
| UPN_4   | <i>ASXL1</i>  | NM_015338.6:c.1934dup;p.(Gly646Trpfs*12)        | InDel         | 6.07    | BM       |
| UPN_40  | <i>DNMT3A</i> | NM_175629.2:c.1900A>T; p.(Ile634Phe)            | Missense      | 1.07    | BM       |
| UPN_41  | <i>DNMT3A</i> | NM_175629.2:c.1430-3C>G;p.?                     | Splice site   | 3.08    | BM       |
| UPN_42  | <i>DNMT3A</i> | NM_175629.2:c.2377T>C;p.(Tyr793His)             | Missense      | 1.74    | BM       |
| UPN_43  | <i>DNMT3A</i> | NM_175629.2:c.2141C>G;p.(Ser714Cys)             | Missense      | 2.14    | BM       |
| UPN_44  | <i>DNMT3A</i> | NM_175629.2:c.1924G>A;p.(Gly642Arg)             | Missense      | 1.17    | BM       |
| UPN_45  | <i>DNMT3A</i> | NM_175629.2:c.2322+3A>G;p.?                     | Splice site   | 1.44    | BM       |
| UPN_49  | <i>DNMT3A</i> | NM_175629.2:c.2727T>A; p.(Phe909Leu)            | Missense      | 1.85    | PB       |
| UPN_49  | <i>SF3B1</i>  | NM_012433.3:c.1997A>C; p.(Lys666Thr)            | Missense      | 9.01    | PB       |
| UPN_5   | <i>ASXL1</i>  | NM_015338.6:c.1934dup;p.(Gly646Trpfs*12)        | InDel         | 7.01    | BM       |
| UPN_50  | <i>DNMT3A</i> | NM_175629.2:c.2391C>A;p.(Asn797Lys)             | Missense      | 1.51    | BM       |
| UPN_50  | <i>NFE2</i>   | NM_001136023.3:c.705dup;p.(Pro236Serfs*14)      | InDel         | 3.09    | BM       |
| UPN_51  | <i>DNMT3A</i> | NM_175629.2:c.2494A>G;p.(Thr832Ala)             | Missense      | 6.42    | BM       |
| UPN_51  | <i>ZRSR2</i>  | NM_005089.3:c.370C>T;p.(Gln124*)                | Nonsense      | 2.93    | BM       |
| UPN_52  | <i>DNMT3A</i> | NM_175629.2:c.1949T>G, p.(Leu650Arg)            | Missense      | 1.28    | BM       |
| UPN_52  | <i>TP53</i>   | NM_000546.5:c.536A>G, p.(His179Arg)             | Missense      | 4.48    | BM       |
| UPN_53  | <i>DNMT3A</i> | NM_175629.2: c.2644C>T, p.(Arg882Cys)           | Missense      | 27.42   | BM       |
| UPN_53  | <i>NFE2</i>   | NM_001136023.3:c.578_581del, p.(Asn193Ilefs*12) | InDel         | 24.62   | BM       |
| UPN_54  | <i>DNMT3A</i> | NM_175629.2:c.2332G>A;p.(Val778Met)             | Missense      | 1.03    | BM       |
| UPN_54  | <i>U2AF2</i>  | NM_007279.2:c.977G>C;p.(Gly326Ala)              | Missense      | 7.93    | BM       |
| UPN_55  | <i>DNMT3A</i> | NM_175629.2:c.1668-2A>G;p.?                     | Splice site   | 2.32    | BM       |

| Subject | Gene   | Variant                                               | Mutation type | VAF [%] | Specimen |
|---------|--------|-------------------------------------------------------|---------------|---------|----------|
| UPN_55  | MYD88  | NM_001172567.1:c.818T>C;p.(Leu273Pro)                 | Missense      | 27.86   | BM       |
| UPN_57  | DNMT3A | M_175629.2:c.2096G>T; p.(Gly699Val)                   | Missense      | 1.44    | BM       |
| UPN_57  | DNMT3A | NM_175629.2:c.1911_1914delGTCT;p.(Phe640Metfs*10)     | InDel         | 3.33    | BM       |
| UPN_58  | DNMT3A | NM_175629.2:c.2656C>T; p.(Gln886*)                    | Nonsense      | 1.20    | BM       |
| UPN_58  | DNMT3A | NM_175629.2:c.1936+1G>T;p.?                           | Splice site   | 6.30    | BM       |
| UPN_59  | DNMT3A | NM_175629.2:c.1071_1093del;p.(Thr358Profs*27)         | InDel         | 5.38    | BM       |
| UPN_59  | DNMT3A | NM_175629.2:c.2206C>T;p.(Arg736Cys)                   | Missense      | 31.70   | BM       |
| UPN_60  | DNMT3A | NM_175629.2:c.2106_2107insA;p.(Leu703Thrfs*10)        | InDel         | 1.23    | BM       |
| UPN_60  | DNMT3A | NM_175629.2:c.1501_1508dup;p.(Leu504Metfs*150)        | InDel         | 4.19    | BM       |
| UPN_61  | DNMT3A | NM_175629.2:c.2045T>G;p.(Met682Arg)                   | Missense      | 2.39    | BM       |
| UPN_61  | DNMT3A | NM_175629.2:c.2245C>T;p.(Arg749Cys)                   | Missense      | 3.29    | BM       |
| UPN_62  | DNMT3A | NM_175629.2:c.2339T>C;p.(Ile780Thr)                   | Missense      | 1.22    | PB       |
| UPN_62  | DNMT3A | NM_175629.2:c.1040T>C;p.(Leu347Pro)                   | Missense      | 32.70   | PB       |
| UPN_64  | DNMT3A | NM_175629.2:c.1154del;p.(Pro385Argfs*22)              | InDel         | 4.88    | BM       |
| UPN_64  | TP53   | NM_000546.5:c.524G>A;p.(Arg175His)                    | Missense      | 1.99    | BM       |
| UPN_64  | U2AF2  | NM_007279.2:c.866A>G;p.(Asn289Ser)                    | Missense      | 1.58    | BM       |
| UPN_65  | DNMT3A | NM_175629.2:c.2580G>A;p.(Trp860*)                     | Nonsense      | 1.21    | PB       |
| UPN_65  | DNMT3A | NM_175629.2:c.1851+1G>A;p.?                           | Splice site   | 2.57    | PB       |
| UPN_65  | DNMT3A | NM_175629.2:c.2458G>T;p.(Glu820*)                     | Nonsense      | 2.20    | PB       |
| UPN_66  | DNMT3A | NM_175629.2:c.2644C>T;p.(Arg882Cys)                   | Missense      | 1.96    | PB       |
| UPN_66  | DNMT3A | NM_175629.2:c.1240_1245delTTCCAG;p.(Phe414_Gln415del) | InDel         | 1.18    | PB       |
| UPN_66  | IDH2   | NM_002168.3:c.419G>A;p.(Arg140Gln)                    | Missense      | 7.43    | PB       |
| UPN_69  | JAK2   | NM_004972.3:c.1849G>T p.(Val617Phe)                   | Missense      | 9.92    | BM       |
| UPN_69  | TET2   | NM_001127208.2:c.4045-2A>G;p.?                        | Splice site   | 3.56    | BM       |
| UPN_7   | ASXL1  | NM_015338.6:c.2644C>T; p.(Gln882*)                    | Nonsense      | 1.05    | PB       |
| UPN_7   | ZBTB7A | NM_015898.4:c.1228T>A;p.(Tyr410Asn)                   | Missense      | 2.89    | PB       |
| UPN_70  | JAK2   | NM_004972.3:c.1849G>T p.(Val617Phe)                   | Missense      | 3.54    | BM       |
| UPN_70  | TET2   | NM_001127208.2:c.3789T>A;p.(Cys1263*)                 | Nonsense      | 2.60    | BM       |
| UPN_71  | KRAS   | NM_033360.3:c.35G>A;p.(Gly12Asp)                      | Missense      | 22.19   | PB       |
| UPN_71  | TET2   | NM_001127208.2:c.4393C>T;p.(Arg1465*)                 | Nonsense      | 3.02    | PB       |
| UPN_72  | MYD88  | NM_001172567.1:c.818T>C;p.(Leu273Pro)                 | Missense      | 2.38    | BM       |
| UPN_72  | TET2   | NM_001127208.2:c.2156del;p.(Leu719Cysfs*32)           | InDel         | 1.21    | BM       |
| UPN_72  | TET2   | NM_001127208.2:c.5629A>G;p.(Lys1877Glu)               | Missense      | 1.78    | BM       |
| UPN_72  | TET2   | NM_001127208.2:c.3647G>A;p.(Arg1216Gln)               | Missense      | 2.42    | BM       |
| UPN_73  | NOTCH1 | ENST00000277541:c.7541_7542delCT;p.Pro2514fs          | InDel         | 1.39    | BM       |
| UPN_74  | PHF6   | NM_032458.3:c.998A>T;p.(Asp333Val)                    | Missense      | 1.43    | BM       |
| UPN_75  | PPM1D  | NM_003620.3:c.1545_1546delGT; p.(Met515Ilefs*12)      | InDel         | 1.82    | PB       |
| UPN_75  | TET2   | NM_001127208.2:c.3817T>C; p.(Cys1273Arg)              | Missense      | 3.44    | PB       |
| UPN_75  | TET2   | NM_001127208.2:c.980C>G; p.(Ser327*)                  | Nonsense      | 1.50    | PB       |
| UPN_76  | PPM1D  | NM_003620.3:c.1636delC; p.(Leu546*)                   | InDel         | 2.66    | PB       |
| UPN_77  | PPM1D  | NM_003620.4:c.1573G>T; p.(Glu525*)                    | Nonsense      | 1.38    | BM       |
| UPN_78  | RUNX1  | NM_001754.4:c.664delT; p.(Ser222Profs*15)             | InDel         | 2.69    | PB       |
| UPN_78  | TET2   | NM_001127208.2:c.1081C>T; p.(Gln361*)                 | Nonsense      | 1.37    | PB       |

| Subject | Gene          | Variant                                            | Mutation type | VAF [%] | Specimen |
|---------|---------------|----------------------------------------------------|---------------|---------|----------|
| UPN_79  | <i>RUNX1</i>  | NM_001754.4:c.833C>A;p.(Pro278Gln)                 | Missense      | 1.76    | BM       |
| UPN_79  | <i>TERT</i>   | NM_198253.3:c.1573+6G>T;p.?                        | Splice site   | 4.96    | BM       |
| UPN_8   | <i>BCOR</i>   | NM_001123385.2:c.4163C>T; p.(Ala1388Val)           | Missense      | 1.23    | PB       |
| UPN_8   | <i>DNMT3A</i> | NM_175629.2:c.886G>A; p.(Val296Met)                | Missense      | 3.21    | PB       |
| UPN_8   | <i>TET2</i>   | NM_001127208.2:c.4525A>T;p.(Lys1509*)              | Nonsense      | 2.46    | PB       |
| UPN_8   | <i>ZRSR2</i>  | NM_005089.3:c.1338_1343dup;p.(Ser447_Arg448dup)    | InDel         | 31.32   | PB       |
| UPN_80  | <i>SF3B1</i>  | NM_012433.3:c.2230G>C;p.(Ala744Pro)                | Missense      | 2.61    | PB       |
| UPN_81  | <i>SF3B1</i>  | NM_012433.3:c.1873C>T, p.(Arg625Cys)               | Missense      | 14.97   | BM       |
| UPN_82  | <i>SRSF2</i>  | NM_003016.4:c.283C>G;p.(Pro95Ala)                  | Missense      | 26.53   | BM       |
| UPN_85  | <i>TET2</i>   | NM_001127208.2:c.3885delC; p.(Tyr1295*)            | InDel         | 2.81    | PB       |
| UPN_86  | <i>TET2</i>   | NM_001127208.2:c.5127dup;p.(Thr1710Tyrfs*3)        | InDel         | 1.66    | PB       |
| UPN_87  | <i>TET2</i>   | NM_001127208.2:c.670G>T;p.(Glu224*)                | Nonsense      | 2.16    | PB       |
| UPN_88  | <i>TET2</i>   | NM_001127208.2:c.456_457dup;p.(Ser153Phefs*3)      | InDel         | 2.24    | PB       |
| UPN_89  | <i>TET2</i>   | NM_001127208.2:c.3954+5G>A;p.?                     | Splice site   | 2.10    | BM       |
| UPN_9   | <i>BCOR</i>   | NM_001123385.2:c.838G>A;p.(Val280Ile)              | Missense      | 13.32   | BM       |
| UPN_9   | <i>CXCR4</i>  | NM_001008540.2:c.1045dup;p.(Glu349Glyfs*13)        | InDel         | 1.92    | BM       |
| UPN_90  | <i>TET2</i>   | NM_001127208.2:c.4353del;p.(Arg1452Glufs*6)        | InDel         | 5.17    | BM       |
| UPN_91  | <i>TET2</i>   | NM_001127208.2:c.5079_5082del;p.(Tyr1693*)         | InDel         | 7.13    | BM       |
| UPN_92  | <i>TET2</i>   | NM_001127208.2:c.1486del;p.(Met496*)               | InDel         | 1.30    | BM       |
| UPN_96  | <i>TET2</i>   | NM_001127208.2:c.3662G>A;p.(Cys1221Tyr)            | Missense      | 3.24    | PB       |
| UPN_96  | <i>TET2</i>   | NM_001127208.2:c.3482G>C;p.(Arg1161Thr)            | Missense      | 5.00    | PB       |
| UPN_97  | <i>TET2</i>   | NM_001127208.2:c.5650A>G;p.(Thr1884Ala)            | Missense      | 1.11    | BM       |
| UPN_97  | <i>TET2</i>   | NM_001127208.2:c.4161C>A;p.(Asn1387Lys)            | Missense      | 15.24   | BM       |
| UPN_98  | <i>TET2</i>   | NM_001127208.2:c.663_666delACAT;p.(His222Valfs*27) | InDel         | 2.14    | PB       |
| UPN_98  | <i>TET2</i>   | NM_001127208.2:c.1038_1039delAG;p.(Ala347Valfs*3)  | InDel         | 3.27    | PB       |
| UPN_99  | <i>U2AF2</i>  | NM_007279.2:c.259_261delAAG;p.(Lys87del)           | InDel         | 1.08    | BM       |

**Abbreviations:** VAF, variant allele frequency; InDel, insertion/deletion variant; BM, bone marrow; PB, peripheral blood; UPN, unique patient number.



**Supplemental Table 3: Comparison of variant allele frequencies in paired BM and PB samples from 21 individuals with clonal hematopoiesis.**

| Subject     | Gene           | Variant                                   | BM sample   |            | PB sample   |            |
|-------------|----------------|-------------------------------------------|-------------|------------|-------------|------------|
|             |                |                                           | VAF [%]     | Coverage   | VAF [%]     | Coverage   |
| UPN_6       | ASXL1          | c.2512_2537dup; p.(Ser846Argfs*5)         | 16.92       | 1876       | 11.42       | 1655       |
|             | ETV6           | c.844dup;p.(Arg282Profs*18)               | 0.37        | 2685       | 0.58        | 1719       |
| UPN_7       | ASXL1          | c.2644C>T; p.(Gln882*)                    | 6.95        | 820        | 1.05        | 1045       |
|             | ZBTB7A         | c.1228T>A;p.(Tyr410Asn)                   | 2.50        | 1482       | 2.89        | 1383       |
| UPN_8       | <b>BCOR*</b>   | <b>c.4163C&gt;T; p.(Ala1388Val)</b>       | <b>ND</b>   | <b>700</b> | <b>1.22</b> | <b>734</b> |
|             | TET2           | c.4525A>T;p.(Lys1509*)                    | 7.06        | 1126       | 2.46        | 1342       |
|             | DNMT3A         | c.886G>A; p.(Val296Met)                   | 1.62        | 618        | 3.21        | 654        |
|             | DNMT3A         | c.2339T>G;p.(Ile780Ser)                   | 1.51        | 1323       | 0.06        | 3451       |
|             | ZRSR2          | c.1338_1343dup;p.(Ser447_Arg448dup)       | 43.06       | 353        | 31.32       | 514        |
| UPN_18      | DNMT3A         | c.2092T>G; p.(Trp698Gly)                  | 6.97        | 717        | 5.77        | 762        |
| UPN_19      | DNMT3A         | c.2195T>C; p.(Phe732Ser)                  | 1.32        | 683        | 1.15        | 786        |
| UPN_21      | DNMT3A         | c.2047_2056del; p.(Tyr683Thrfs*19)        | 4.55        | 857        | 3.41        | 586        |
| UPN_29      | DNMT3A         | c.2322+2T>C;p.?                           | 0.64        | 1713       | 1.35        | 1111       |
| UPN_31      | DNMT3A         | c.1904G>A;p.(Arg635Gln)                   | 6.33        | 1248       | 6.54        | 1469       |
| UPN_49      | DNMT3A         | c.2727T>A; p.(Phe909Leu)                  | 2.37        | 1054       | 1.85        | 758        |
|             | SF3B1          | c.1997A>C; p.(Lys666Thr)                  | 9.88        | 921        | 9.01        | 677        |
| UPN_65      | DNMT3A         | c.2458G>T; p.(Glu820*)                    | 3.18        | 1634       | 2.20        | 1407       |
|             | DNMT3A         | c.1851+1G>A; p.?                          | 2.17        | 738        | 2.57        | 818        |
|             | DNMT3A         | c.2580G>A;p.(Trp860*)                     | 1.29        | 851        | 1.21        | 745        |
| UPN_66      | DNMT3A         | c.1240_1245delTTCCAG;p.(Phe414_Gln415del) | 1.91        | 1467       | 1.13        | 704        |
|             | DNMT3A         | c.2644C>T;p.(Arg882Cys)                   | 3.91        | 818        | 1.96        | 1124       |
|             | IDH2           | c.419G>A;p.(Arg140Gln)                    | 2.67        | 1422       | 7.43        | 1790       |
|             | DNMT3A         | c.1429+1G>A;p.?                           | 1.96        | 1018       | 0.66        | 1958       |
| UPN_71      | TET2           | c.4393C>T;p.(Arg1465*)                    | 3.07        | 489        | 3.02        | 364        |
|             | KRAS           | c.35G>A;p.(Gly12Asp)                      | 16.50       | 721        | 22.19       | 1005       |
| UPN_75      | TET2           | c.980C>G; p.(Ser327*)                     | 1.79        | 1119       | 1.50        | 1203       |
|             | TET2           | c.3817T>C; p.(Cys1273Arg)                 | 4.22        | 1207       | 3.44        | 1017       |
|             | PPM1D          | c.1545_1546delGT; p.(Met515Ilefs*12)      | 3.75        | 773        | 1.82        | 881        |
| UPN_76      | PPM1D          | c.1636delC; p.(Leu546*)                   | 3.11        | 644        | 2.66        | 826        |
| UPN_80      | SF3B1          | c.2230G>C;p.(Ala744Pro)                   | 6.35        | 929        | 2.61        | 881        |
| UPN_86      | TET2           | c.5127dup;p.(Thr1710Tyrfs*3)              | 1.66        | 1743       | 1.66        | 2046       |
| UPN_88      | TET2           | c.456_457dup;p.(Ser153Phefs*3)            | 4.19        | 1337       | 2.24        | 848        |
| UPN_96      | TET2           | c.3662G>A;p.(Cys1221Tyr)                  | 3.29        | 3682       | 3.24        | 2408       |
|             | TET2           | c.3482G>C;p.(Arg1161Thr)                  | 9.84        | 2257       | 5.00        | 1341       |
|             | DNMT3A         | c.1945G>T;p.(Val649Leu)                   | 1.42        | 1615       | 0.73        | 2042       |
|             | TET2           | c.822del;p.(Asn275Ilefs*18)               | 2.63        | 3226       | 0.67        | 4480       |
| UPN_98      | <b>DNMT3A*</b> | <b>c.731del;p.(Pro244Leufs*72)</b>        | <b>1.21</b> | <b>828</b> | <b>ND</b>   | <b>874</b> |
|             | TET2           | c.663_666delACAT;p.(His222Valfs*27)       | 1.40        | 714        | 2.14        | 1167       |
|             | TET2           | c.1038_1039delAG;p.(Ala347Valfs*3)        | 2.23        | 1165       | 3.27        | 1588       |
| UPN_27<br>2 | SRP72          | c.869A>G;p.(Asn290Ser)                    | 4.07        | 589        | 3.16        | 792        |
|             | TET2           | c.3883T>G;p.(Tyr1295Asp)                  | 1.28        | 1249       | 0.75        | 2259       |
| UPN_27<br>6 | DNMT3A         | c.1238dup;p.(Phe414Leufs*7)               | 1.86        | 1557       | 1.42        | 1973       |
|             | STAG2          | p.(Leu203Phe)                             | 1.47        | 955        | 0.34        | 2336       |

\* Highlighted variants were validated by digital droplet PCR, results are shown in Supplemental Table 4

**Abbreviations:** VAF, variant allele frequency; InDel, insertion/deletion variant; BM, bone marrow, PB, peripheral blood; ND, not detectable; UPN, unique patient number.

**Supplemental Table 4: Orthogonal validation by mutation-specific digital droplet PCR of variants identified in paired BM and PB samples (UPN\_98 and UPN\_8) and in paired bone marrow samples from individuals undergoing simultaneous bilateral hip replacement (UPN\_2 and UPN\_248).**

| Subject | Gene          | Variant                               | Sample | VAF [%] |
|---------|---------------|---------------------------------------|--------|---------|
| UPN_98  | <i>DNMT3A</i> | c.731del;<br>p.(Pro244Leufs*72)       | BM     | 0.831   |
|         |               |                                       | PB     | 0.084   |
| UPN_8   | <i>DNMT3A</i> | c.2339T>G;<br>p.(Ile780Ser)           | BM     | 1.584   |
|         |               |                                       | PB     | 0.267   |
| UPN_2   | <i>ASXL1</i>  | c.2083C>T;<br>p.(Gln695*)             | Hip 1  | 1.087   |
|         |               |                                       | Hip 2  | 0.050   |
| UPN_248 | <i>ASXL1</i>  | c.2258_2259dup;<br>p.(Thr754Profs*19) | Hip 1  | 0.274   |
|         |               |                                       | Hip 2  | 4.154   |

**Abbreviations:** VAF, variant allele frequency; BM, bone marrow, PB, peripheral blood; UPN, unique patient number.

### Supplemental Table 5: Overview of variants found in patients with ‘large-clone’ CHIP.

Large-clone CHIP was defined as at least one variant with a VAF >20% (highlighted in red in the table). Subjects are grouped according to their clonal profile (single variants, multiple variants with one “dominant” variant, or several variants with VAF >20%).

| Mutational profile | UPN                                        | Gene          | Variant                                         | Mutation type                                     | VAF [%] |      |
|--------------------|--------------------------------------------|---------------|-------------------------------------------------|---------------------------------------------------|---------|------|
| Single variant     | UPN_82                                     | <i>SRSF2</i>  | NM_003016.4:c.283C>G;p.(Pro95Ala)               | Missense                                          | 26.5    |      |
|                    | UPN_20                                     | <i>DNMT3A</i> | NM_175629.2:c.2591T>A; p.(Met864Lys)            | Missense                                          | 21.3    |      |
| Multiple variants  | UPN_254                                    | <i>TET2</i>   | NM_001127208.2:c.5650A>G;p.(Thr1884Ala)         | Missense                                          | 43.9    |      |
|                    |                                            | <i>SRSF2</i>  | NM_003016.4:c.242A>T;p.(Asp81Val)               | Missense                                          | 3.2     |      |
|                    | UPN_62                                     | <i>DNMT3A</i> | NM_175629.2:c.1040T>C;p.(Leu347Pro)             | Missense                                          | 32.7    |      |
|                    |                                            | <i>DNMT3A</i> | NM_175629.2:c.2339T>C;p.(Ile780Thr)             | Missense                                          | 1.2     |      |
|                    | UPN_59                                     | <i>DNMT3A</i> | NM_175629.2:c.2206C>T;p.(Arg736Cys)             | Missense                                          | 31.7    |      |
|                    |                                            | <i>DNMT3A</i> | NM_175629.2:c.1071_1093del;p.(Thr358Profs*27)   | InDel                                             | 5.4     |      |
|                    | UPN_8                                      | <i>ZRSR2</i>  | NM_005089.3:c.1338_1343dup;p.(Ser447_Arg448dup) | InDel                                             | 31.2    |      |
|                    |                                            | <i>DNMT3A</i> | NM_175629.2:c.886G>A; p.(Val296Met)             | Missense                                          | 3.2     |      |
|                    |                                            | <i>TET2</i>   | NM_001127208.2:c.4525A>T;p.(Lys1509*)           | Nonsense                                          | 2.5     |      |
|                    |                                            | <i>BCOR</i>   | NM_001123385.2:c.4163C>T; p.(Ala1388Val)        | Missense                                          | 1.2     |      |
|                    | UPN_55                                     | <i>MYD88</i>  | NM_001172567.1:c.818T>C;p.(Leu273Pro)           | Missense                                          | 27.9    |      |
|                    |                                            | <i>DNMT3A</i> | NM_175629.2:c.1668-2A>G;p.?                     | Splice site                                       | 2.3     |      |
|                    | UPN_15                                     | <i>DNMT3A</i> | NM_175629.2:c.1123-2A>G;p.?                     | Splice site                                       | 23.6    |      |
|                    |                                            | <i>TET2</i>   | NM_001127208.2:c.4079T>G;p.(Leu1360Arg)         | Missense                                          | 1.2     |      |
|                    | UPN_71                                     | <i>KRAS</i>   | NM_033360.3:c.35G>A;p.(Gly12Asp)                | Missense                                          | 22.3    |      |
|                    |                                            | <i>TET2</i>   | NM_001127208.2:c.4393C>T;p.(Arg1465*)           | Nonsense                                          | 3.0     |      |
|                    | multiple variants with high allelic burden | UPN_248       | <i>SH2B3</i>                                    | NM_005475.2:c.1522dup;p.(Arg508Profs*38)          | InDel   | 40.4 |
|                    |                                            |               | <i>TET2</i>                                     | NM_001127208.2:c.5481_5482del;p.(Gln1828Alafs*17) | InDel   | 32.3 |
| <i>TET2</i>        |                                            |               | NM_001127208.2:c.5165del;p.(Pro1722Leufs*23)    | InDel                                             | 30.1    |      |
| <i>ASXL1</i>       |                                            |               | NM_015338.6:c.2258_2259dup;p.(Thr754Profs*19)   | InDel                                             | 4.9     |      |
| UPN_53             |                                            | <i>DNMT3A</i> | NM_175629.2: c.2644C>T, p.(Arg882Cys)           | Missense                                          | 27.4    |      |
|                    |                                            | <i>NFE2</i>   | NM_001136023.3:c.578_581del, p.(Asn193Ilefs*12) | InDel                                             | 24.6    |      |

**Abbreviations:** VAF, variant allele frequency; InDel, insertion/deletion variant; UPN, unique patient number.

**Supplemental Table 6: Paired-sample sequencing results for 11 patients undergoing bilateral hip replacements.**

| Hip pair | Variant                                        | Hip 1           |              | Hip 2           |              | <i>p</i><br>(Fisher's exact test) |
|----------|------------------------------------------------|-----------------|--------------|-----------------|--------------|-----------------------------------|
|          |                                                | Variant reads   | VAF [%]      | Variant reads   | VAF [%]      |                                   |
| UPN_2    | <b>ASXL1:c.2083C&gt;T;p.(Gln695*)</b>          | <b>29/2307</b>  | <b>1.29</b>  | <b>2/4015</b>   | <b>NA</b>    | <b>&lt;.0001</b>                  |
|          | JAK2:c.1849G>T, p.(Val617Phe)                  | 94/1577         | 5.96         | 141/2589        | 5.45         | .49                               |
|          | DNMT3A:c.2141C>G;p.(Ser714Cys)                 | 20/2358         | 0.85         | 67/5779         | 1.15         | .24                               |
| UPN_248  | <b>ASXL1:c.2258_2259dup;p.(Thr754Profs*19)</b> | <b>9/2779</b>   | <b>0.32</b>  | <b>144/2950</b> | <b>4.88</b>  | <b>&lt;.0001</b>                  |
|          | TET2:c.5165del;p.(Pro1722Leufs*23)             | 432/1485        | 29.09        | 450/1495        | 30.1         | .55                               |
|          | TET2:c.5481_5482del;p.(Gln1828Alafs*17)        | 549/1644        | 33.39        | 575/1780        | 32.3         | .51                               |
|          | <b>SH2B3:c.1522dup;p.(Arg508Profs*38)</b>      | <b>565/1535</b> | <b>36.81</b> | <b>679/1680</b> | <b>40.42</b> | <b>.04</b>                        |
| UPN_242  | ASXL1:c.2885_2886del;p.(Val962Alafs*7)         | 18/1402         | 1.28         | 40/2143         | 1.87         | .22                               |
| UPN_243  | TET2:c.2919C>A;p.(Cys973*)                     | 26/1544         | 1.68         | 9/477           | 1.89         | .84                               |
| UPN_73   | NOTCH1:c.7541_7542delCT;p.Pro2514fs            | 11/552          | 1.99         | 7/503           | 1.39         | .49                               |
| UPN_26   | DNMT3A:c.2332G>A;p.(Val778Met)                 | 76/1498         | 5.07         | 80/1688         | 4.74         | .68                               |
| UPN_251  | TET2:c.5618T>C;p.(Ile1873Thr)                  | 25/2851         | 0.88         | 28/2252         | 1.15         | .21                               |
|          | DNMT3A:c.2530A>G;p.(Lys844Glu)                 | 13/1447         | 0.90         | 20/1285         | 1.45         | .16                               |
| UPN_250  | TET2:c.2375C>A;p.(Ser792*)                     | 23/1988         | 1.1          | 17/1785         | 0.95         | .63                               |
| UPN_249  | No variants identified                         |                 |              |                 |              | NA                                |
| UPN_240  | No variants identified                         |                 |              |                 |              | NA                                |
| UPN_241  | No variants identified                         |                 |              |                 |              | NA                                |

**Footnotes:** Variants that were detected by manual inspection of sequencing reads are highlighted in red.

**Abbreviations:** VAF, variant allele frequency; NA, not applicable; UPN, unique patient number.

**Supplemental Table 7: Allelic burden of eight flow-sorted subpopulations and bulk of five *ASXL1* mutated individuals.**

| Subject | <i>ASXL1</i> (NM_015338.6) variant | VAF in flow-sorted cell fractions |                   |       |       |       |       |                   |                  |                   |
|---------|------------------------------------|-----------------------------------|-------------------|-------|-------|-------|-------|-------------------|------------------|-------------------|
|         |                                    | bulk                              | CD34 <sup>+</sup> | HSC   | CMP   | MEP   | GMP   | CD15 <sup>+</sup> | CD3 <sup>+</sup> | CD19 <sup>+</sup> |
| UPN_226 | c.2179G>T;p.(Glu727*)              | 1.70                              | 2.94              | 2.33  | 3.97  | 6.00  | 2.29  | 1.42              | 0.00             | 0.53              |
| UPN_1   | c.2036dup;p.(Gly680Argfs*38)       | 3.31                              | 3.81              | 2.64  | 5.56  | 9.86  | 3.79  | 7.91              | 0.23             | 0.54              |
|         | c.2385del;p.(Trp796Glyfs*22)       | 4.72                              | 8.93              | 8.79  | 11.42 | 9.68  | 5.48  | 7.57              | 0.00             | 0.00              |
| UPN_4   | c.1934dup;p.(Gly646Trpfs*12)       | 7.38                              | 11.60             | 12.23 | 12.70 | 19.67 | 10.60 | 7.58              | 5.12             | 11.11             |
| UPN_5   | c.1934dup;p.(Gly646Trpfs*12)       | 9.24                              | 12.18             | 13.37 | 12.93 | 5.13  | 10.64 | 4.83              | 1.23             | 8.82              |
| UPN_3   | c.2954_2957del;p.(Ile985Thrfs*7)   | 4.90                              | 6.15              | 18.11 | 13.58 | 6.48  | 2.56  | 1.17              | 0.00             | 0.34              |

**Abbreviations:** HSC, hematopoietic stem cells; CMP, common-myeloid progenitors; MEP, megakaryocyte-erythroid progenitors; GMP, granulocyte-monocyte progenitors; VAF, variant allele frequency; UPN, unique patient number.

**Supplemental Table 8: Statistical analyses of differential clonal involvement of flow-sorted subpopulations and bulk marrow in *ASXL1*-mutated individuals.**

Corrected *p*-values are indicated for the analysis of each pair of subpopulations using Fisher's test followed by correction for multiple hypothesis testing using the Benjamini-Hochberg procedure. Significant differences are indicated in red.

|         |                                               | HSC   | CD34+                                     | CMP                    | GMP                    | MEP                   | CD3+                   | CD19+                  | CD15+                  | bulk    |
|---------|-----------------------------------------------|-------|-------------------------------------------|------------------------|------------------------|-----------------------|------------------------|------------------------|------------------------|---------|
| UPN_226 | NM_015338.6:c.2179G>T; p.(Glu727*)            | HSC   |                                           |                        |                        |                       |                        |                        |                        |         |
|         |                                               | CD34+ | 1.00                                      |                        |                        |                       |                        |                        |                        |         |
|         |                                               | CMP   | 0.81                                      | 0.67                   |                        |                       |                        |                        |                        |         |
|         |                                               | GMP   | 1.00                                      | 0.74                   | 0.49                   |                       |                        |                        |                        |         |
|         |                                               | MEP   | 0.44                                      | 0.26                   | 0.55                   | 0.21                  |                        |                        |                        |         |
|         |                                               | CD3+  | 0.052                                     | 0.00011                | 6.83x10 <sup>-5</sup>  | 0.0031                | 0.00011                |                        |                        |         |
|         |                                               | CD19+ | 0.25                                      | 0.016                  | 0.0032                 | 0.099                 | 0.0032                 | 0.21                   |                        |         |
|         |                                               | CD15+ | 0.74                                      | 0.27                   | 0.10                   | 0.55                  | 0.052                  | 0.017                  | 0.29                   |         |
|         |                                               | bulk  | 0.74                                      | 0.27                   | 0.099                  | 0.73                  | 0.052                  | 0.0031                 | 0.16                   | 0.86    |
|         |                                               | UPN_1 | NM_015338.6:c.2036dup; p.(Gly680Argfs*38) | HSC                    |                        |                       |                        |                        |                        |         |
| CD34+   | 0.61                                          |       |                                           |                        |                        |                       |                        |                        |                        |         |
| CMP     | 0.15                                          |       |                                           | 0.15                   |                        |                       |                        |                        |                        |         |
| GMP     | 0.61                                          |       |                                           | 1.00                   | 0.22                   |                       |                        |                        |                        |         |
| MEP     | 0.0046                                        |       |                                           | 0.0016                 | 0.057                  | 0.0045                |                        |                        |                        |         |
| CD3+    | 0.0012                                        |       |                                           | 3.24x10 <sup>-10</sup> | 6.21x10 <sup>-14</sup> | 1.59x10 <sup>-8</sup> | 8.70x10 <sup>-15</sup> |                        |                        |         |
| CD19+   | 0.017                                         |       |                                           | 2.46x10 <sup>-6</sup>  | 3.17x10 <sup>-9</sup>  | 3.29x10 <sup>-3</sup> | 4.07x10 <sup>-11</sup> | 0.36                   |                        |         |
| CD15+   | 0.011                                         |       |                                           | 0.0058                 | 0.18                   | 0.013                 | 0.55                   | 7.07x10 <sup>-17</sup> | 3.77x10 <sup>-12</sup> |         |
| bulk    | 0.86                                          |       |                                           | 0.68                   | 0.051                  | 0.71                  | 0.0039                 | 3.17x10 <sup>-9</sup>  | 2.16x10 <sup>-5</sup>  | 0.00084 |
| UPN_4   | NM_015338.6:c.1934dup; p.(Gly646Trpfs*12)     |       |                                           | HSC                    |                        |                       |                        |                        |                        |         |
|         |                                               | CD34+ | 0.92                                      |                        |                        |                       |                        |                        |                        |         |
|         |                                               | CMP   | 0.97                                      | 0.78                   |                        |                       |                        |                        |                        |         |
|         |                                               | GMP   | 0.64                                      | 0.78                   | 0.46                   |                       |                        |                        |                        |         |
|         |                                               | MEP   | 0.016                                     | 0.0058                 | 0.0058                 | 0.0011                |                        |                        |                        |         |
|         |                                               | CD3+  | 0.0054                                    | 0.0058                 | 0.00041                | 0.016                 | 1.16x10 <sup>-9</sup>  |                        |                        |         |
|         |                                               | CD19+ | 0.90                                      | 1.00                   | 0.78                   | 0.97                  | 0.021                  | 0.037                  |                        |         |
|         |                                               | CD15+ | 0.15                                      | 0.19                   | 0.065                  | 0.35                  | 5.57x10 <sup>-5</sup>  | 0.35                   | 0.35                   |         |
|         |                                               | bulk  | 0.063                                     | 0.072                  | 0.011                  | 0.19                  | 7.08x10 <sup>-8</sup>  | 0.29                   | 0.22                   | 1.00    |
|         |                                               | UPN_5 | NM_015338.6:c.1934dup; p.(Gly646Trpfs*12) | HSC                    |                        |                       |                        |                        |                        |         |
| CD34+   | 0.74                                          |       |                                           |                        |                        |                       |                        |                        |                        |         |
| CMP     | 0.91                                          |       |                                           | 0.80                   |                        |                       |                        |                        |                        |         |
| GMP     | 0.67                                          |       |                                           | 0.75                   | 0.71                   |                       |                        |                        |                        |         |
| MEP     | 0.0097                                        |       |                                           | 0.0046                 | 0.0026                 | 0.097                 |                        |                        |                        |         |
| CD3+    | 1.56x10 <sup>-10</sup>                        |       |                                           | 1.15x10 <sup>-15</sup> | 1.59x10 <sup>-16</sup> | 2.5x10 <sup>-6</sup>  | 0.0044                 |                        |                        |         |
| CD19+   | 0.097                                         |       |                                           | 0.088                  | 0.038                  | 0.67                  | 0.13                   | 2.86x10 <sup>-10</sup> |                        |         |
| CD15+   | 0.0020                                        |       |                                           | 0.00041                | 9.00x10 <sup>-5</sup>  | 0.050                 | 0.87                   | 0.0026                 | 0.041                  |         |
| bulk    | 0.15                                          |       |                                           | 0.13                   | 0.077                  | 0.74                  | 0.088                  | 1.75x10 <sup>-10</sup> | 0.87                   | 0.024   |
| UPN_3   | NM_015338.6:c.2954_2957del; p.(Ile985Thrfs*7) |       |                                           | HSC                    |                        |                       |                        |                        |                        |         |
|         |                                               | CD34+ | 2.64x10 <sup>-7</sup>                     |                        |                        |                       |                        |                        |                        |         |
|         |                                               | CMP   | 0.054                                     | 0.0016                 |                        |                       |                        |                        |                        |         |
|         |                                               | GMP   | 3.45x10 <sup>-15</sup>                    | 0.031                  | 9.09x10 <sup>-9</sup>  |                       |                        |                        |                        |         |
|         |                                               | MEP   | 1.82x10 <sup>-5</sup>                     | 0.87                   | 0.0039                 | 0.027                 |                        |                        |                        |         |
|         |                                               | CD3+  | 1.11x10 <sup>-27</sup>                    | 7.83x10 <sup>-8</sup>  | 1.29x10 <sup>-18</sup> | 0.0010                | 6.13x10 <sup>-6</sup>  |                        |                        |         |
|         |                                               | CD19+ | 1.77x10 <sup>-31</sup>                    | 1.79x10 <sup>-7</sup>  | 3.29x10 <sup>-20</sup> | 0.0068                | 1.41x10 <sup>-7</sup>  | 0.53                   |                        |         |
|         |                                               | CD15+ | 2.04x10 <sup>-14</sup>                    | 0.0034                 | 2.85x10 <sup>-9</sup>  | 0.30                  | 0.0028                 | 0.061                  | 0.20                   |         |
|         |                                               | bulk  | 2.16x10 <sup>-19</sup>                    | 0.42                   | 2.32x10 <sup>-8</sup>  | 0.060                 | 0.33                   | 3.14x10 <sup>-8</sup>  | 3.98x10 <sup>-8</sup>  | 0.0058  |
|         |                                               | UPN_1 | NM_015338.6:c.2385del; p.(Trp796Glyfs*22) | HSC                    |                        |                       |                        |                        |                        |         |
| CD34+   | 1.00                                          |       |                                           |                        |                        |                       |                        |                        |                        |         |
| CMP     | 0.74                                          |       |                                           | 0.57                   |                        |                       |                        |                        |                        |         |
| GMP     | 0.49                                          |       |                                           | 0.31                   | 0.048                  |                       |                        |                        |                        |         |
| MEP     | 1.00                                          |       |                                           | 0.90                   | 0.90                   | 0.38                  |                        |                        |                        |         |
| CD3+    | 2.00x10 <sup>-6</sup>                         |       |                                           | 1.29x10 <sup>-10</sup> | 1.32x10 <sup>-12</sup> | 4.34x10 <sup>-5</sup> | 8.39x10 <sup>-6</sup>  |                        |                        |         |
| CD19+   | 9.69x10 <sup>-6</sup>                         |       |                                           | 8.04x10 <sup>-09</sup> | 1.24x10 <sup>-10</sup> | 2.72x10 <sup>-5</sup> | 2.72x10 <sup>-5</sup>  | 1.00                   |                        |         |
| CD15+   | 0.90                                          |       |                                           | 0.88                   | 0.32                   | 0.58                  | 0.77                   | 1.37x10 <sup>-7</sup>  | 1.60x10 <sup>-5</sup>  |         |
| bulk    | 0.24                                          |       |                                           | 0.048                  | 0.0030                 | 0.88                  | 0.24                   | 1.02x10 <sup>-6</sup>  | 1.55x10 <sup>-5</sup>  | 0.32    |

**Abbreviations:** HSC, hematopoietic stem cells; CMP, common-myeloid progenitors; MEP, megakaryocyte-erythroid progenitors; GMP, granulocyte-monocyte progenitors; VAF, variant allele frequency; UPN, unique patient number.

### Supplemental Table 9: Longitudinal analysis in the baseline non-CH cohort over a time of up to 24 months.

Variants highlighted in red were not called during primary data analysis, but detected upon manual inspection of sequencing reads.

| Subject | Gene          | Variant                                       | VAF [%]   |      |       |       |       |
|---------|---------------|-----------------------------------------------|-----------|------|-------|-------|-------|
|         |               |                                               | Screening | 6 mo | 12 mo | 18 mo | 24 mo |
| UPN_281 |               | none                                          | none      | none | NA    | NA    | NA    |
| UPN_284 |               | none                                          | none      | none | none  | NA    | NA    |
| UPN_285 |               | none                                          | none      | none | none  | NA    | NA    |
| UPN_102 | <i>DNMT3A</i> | NM_175629.2:c.[1257delT]; p.(Lys420Argfs*231) | 0.70      | NA   | 1.32  | NA    | 2.00  |
| UPN_103 |               | none                                          | none      | NA   | none  | none  | NA    |
| UPN_104 |               | none                                          | none      | NA   | none  | NA    | NA    |
| UPN_105 |               | none                                          | none      | NA   | none  | NA    | NA    |
| UPN_106 | <i>PRPF8</i>  | NM_006445.4:c.3361A>G; p.(Asn1121Asp)         | 0.91      | 0.82 | 1.02  | 1.20  | NA    |
| UPN_107 |               | none                                          | none      | NA   | none  | NA    | NA    |
| UPN_108 |               | none                                          | none      | NA   | none  | NA    | NA    |
| UPN_109 |               | none                                          | none      | NA   | none  | NA    | NA    |
| UPN_110 |               | none                                          | none      | none | NA    | NA    | NA    |
| UPN_111 |               | none                                          | none      | none | NA    | NA    | NA    |
| UPN_112 |               | none                                          | none      | NA   | none  | NA    | NA    |
| UPN_113 |               | none                                          | none      | none | none  | NA    | NA    |
| UPN_114 |               | none                                          | none      | NA   | none  | NA    | NA    |
| UPN_115 |               | none                                          | none      | none | NA    | NA    | NA    |
| UPN_116 |               | none                                          | none      | none | none  | NA    | NA    |
| UPN_117 |               | none                                          | none      | none | none  | NA    | NA    |
| UPN_118 |               | none                                          | none      | none | NA    | NA    | NA    |
| UPN_119 |               | none                                          | none      | none | NA    | NA    | NA    |
| UPN_120 | <i>ASXL1</i>  | NM_015338.6:c.2036dup; p.(Gly680Argfs*38)     | 1.16      | 1.78 | NA    | NA    | NA    |
|         | <i>TET2</i>   | NM_001127208.2:c.3986T>C; p.(Leu1329Pro)      | 1.05      | 1.42 | NA    | NA    | NA    |
| UPN_121 |               | none                                          | none      | none | NA    | NA    | NA    |
| UPN_122 |               | none                                          | none      | none | none  | NA    | NA    |
| UPN_124 |               | none                                          | none      | NA   | none  | NA    | NA    |
| UPN_126 |               | none                                          | none      | none | NA    | NA    | NA    |
| UPN_127 |               | none                                          | none      | NA   | none  | NA    | NA    |

**Abbreviations:** VAF, variant allele frequency; mo, months; NA, not analyzed; UPN, unique patient number.

**Supplemental Table 10: Longitudinal analysis of CH temporal evolution over a time of up to 18 months.**

Bold font indicates variants that emerged or dropped below the limit of detection during follow-up. Variants in red were not called during primary data analysis, but detected upon manual inspection of sequencing reads.

| Subject | Gene          | Variant                              | VAF [%]     |             |             |           |
|---------|---------------|--------------------------------------|-------------|-------------|-------------|-----------|
|         |               |                                      | Screening   | 6 mo        | 12 mo       | 18 mo     |
| UPN_49  | <i>DNMT3A</i> | c.2727T>A; p.(Phe909Leu)             | 1.85        | 1.19        | 2.20        | NA        |
|         | <i>SF3B1</i>  | c.1997A>C; p.(Lys666Thr)             | 9.01        | 6.97        | 9.25        | NA        |
| UPN_85  | <i>TET2</i>   | c.3885delC; p.(Tyr1295*)             | 2.81        | 3.71        | 5.05        | 4.53      |
| UPN_18  | <i>DNMT3A</i> | c.2092T>G; p.(Trp698Gly)             | 5.77        | 7.57        | 4.75        | 4.54      |
| UPN_75  | <i>TET2</i>   | c.980C>G; p.(Ser327*)                | 1.50        | 2.42        | 1.41        | 1.85      |
|         | <i>TET2</i>   | c.3817T>C; p.(Cys1273Arg)            | 3.44        | 3.05        | 4.33        | 3.95      |
|         | <i>PPM1D</i>  | c.1545_1546delGT; p.(Met515Ilefs*12) | 1.82        | 2.93        | 3.56        | 2.9       |
| UPN_65  | <i>DNMT3A</i> | c.2458G>T; p.(Glu820*)               | 2.20        | 1.70        | 2.99        | NA        |
|         | <i>DNMT3A</i> | c.1851+1G>A;p.?                      | 2.57        | 3.70        | 3.99        | NA        |
|         | <i>DNMT3A</i> | c.2580G>A;p.(Trp860*)                | 1.21        | 1.00        | 0.39        | NA        |
| UPN_6   | <i>ASXL1</i>  | c.2512_2537dup; p.(Ser846Argfs*5)    | 11.42       | 11.320      | 9.19        | NA        |
|         | <i>ETV6</i>   | <b>c.844dup;p.(Arg282Profs*18)</b>   | <b>0.58</b> | <b>1.40</b> | <b>0.30</b> | <b>NA</b> |
| UPN_19  | <i>DNMT3A</i> | c.2195T>C; p.(Phe732Ser)             | 1.15        | 0.89        | 0.95        | NA        |
| UPN_20  | <i>DNMT3A</i> | c.2591T>A; p.(Met864Lys)             | 21.29       | 15.28       | 9.38        | NA        |
| UPN_21  | <i>DNMT3A</i> | c.2047_2056del; p.(Tyr683Thrfs*19)   | 3.41        | 5.23        | 3.68        | NA        |
| UPN_76  | <i>PPM1D</i>  | c.1636delC; p.(Leu546*)              | 2.66        | 1.31        | 2.04        | NA        |
| UPN_23  | <i>DNMT3A</i> | c.1506delT; p.(Thr503Profs*148)      | 4.73        | 4.07        | NA          | NA        |
| UPN_80  | <i>SF3B1</i>  | c.2230G>C;p.(Ala744Pro)              | 2.61        | 8.73        | 3.80        | NA        |
| UPN_78  | <i>TET2</i>   | c.1081C>T; p.(Gln361*)               | 1.37        | NA          | 1.20        | NA        |
| UPN_32  | <i>DNMT3A</i> | c.2204A>G;p.(Tyr735Cys)              | 2.60        | 1.04        | 2.64        | NA        |
| UPN_12  | <i>DNMT3A</i> | c.2567_2568delAG;p.(Glu856Glyfs*7)   | 1.56        | 0.56        | NA          | NA        |
| UPN_87  | <i>TET2</i>   | c.670G>T;p.(Glu224*)                 | 2.16        | 1.92        | NA          | NA        |
| UPN_86  | <i>TET2</i>   | c.5127dup;p.(Thr1710Tyrfs*3)         | 1.66        | 1.89        | NA          | NA        |
| UPN_29  | <i>DNMT3A</i> | c.2322+2T>C;p.?                      | 1.35        | NA          | NA          | 1.13      |
| UPN_282 | <i>DNMT3A</i> | c.2190_2215del;p.(Phe731*)           | 10.81       | 20.92       | NA          | NA        |
| UPN_283 | <i>DNMT3A</i> | c.890G>C;p.(Trp297Ser)               | 1.65        | 2.31        | NA          | NA        |
|         | <i>DNMT3A</i> | c.2207G>A;p.(Arg736His)              | 5.68        | 6.87        | NA          | NA        |
|         | <i>SF3B1</i>  | c.1997A>G;p.(Lys666Arg)              | 2.69        | 3.70        | NA          | NA        |
|         | <i>ASXL1</i>  | <b>c.1934dup p.(Gly646Trpfs*12)</b>  | <b>0.68</b> | <b>1.16</b> | <b>NA</b>   | <b>NA</b> |
| UPN_7   | <i>ASXL1</i>  | <b>c.2644C&gt;T; p.(Gln882*)</b>     | <b>1.05</b> | <b>NA</b>   | <b>ND</b>   | <b>NA</b> |
|         | <i>ZBTB7A</i> | c.1228T>A;p.(Tyr410Asn)              | 2.89        | NA          | 1.88        | NA        |

**Abbreviations:** VAF, variant allele frequency; ND, not detected; mo, months; NA, not analyzed; UPN, unique patient number



**Supplemental Table 11: Variants identified in patients with MDS or sAML.**

| Subject | Gene          | Variant                                           | Mutation type | VAF [%] |
|---------|---------------|---------------------------------------------------|---------------|---------|
| MDS_1   | <i>CBL</i>    | NM_005188.3:c.1244G>A;p.(Gly415Asp)               | Missense      | 38.0    |
| MDS_1   | <i>TET2</i>   | NM_001127208.2:c.3404G>A;p.(Cys1135Tyr)           | Missense      | 36.8    |
| MDS_1   | <i>TP53</i>   | NM_000546.5:c.827C>G;p.(Ala276Gly)                | Missense      | 25.1    |
| MDS_2   | <i>DDX41</i>  | NM_016222:c.1574G>A;p.R525H                       | Missense      | 4.3     |
| MDS_2   | <i>DNMT3A</i> | NM_175629.2: c.2645G>A p.(Arg882His)              | Missense      | 5.1     |
| MDS_2   | <i>SRSF2</i>  | NM_003016.4:c.284C>A p.(Pro95His)                 | Missense      | 4.7     |
| MDS_3   | <i>BCOR</i>   | NM_001123385.2:c.3649del;p.(Arg1217Aspfs*21)      | InDel         | 32.3    |
| MDS_3   | <i>BCORL1</i> | NM_021946.4:c.4230dup;p.(Glu1411*)                | InDel         | 4.9     |
| MDS_3   | <i>DNMT3A</i> | NM_175629.2:c.2644C>A;p.(Arg882Ser)               | Missense      | 19.3    |
| MDS_3   | <i>NRAS</i>   | NM_002524.5:c.38G>T;p.(Gly13Val)                  | Missense      | 14.3    |
| MDS_3   | <i>U2AF1</i>  | NM_001025203.1:c.101C>T;p.(Ser34Phe)              | Missense      | 20.3    |
| MDS_4   | <i>RAD21</i>  | NM_006265.3:c.742C>G;p.(Leu248Val)                | Missense      | 37.1    |
| MDS_4   | <i>SF3B1</i>  | NM_012433.3:c.2098A>G p.(Lys700Glu)               | Missense      | 42.6    |
| MDS_4   | <i>TET2</i>   | NM_001127208.2:c.3854_3856del;p.(Phe1285del)      | InDel         | 30.5    |
| MDS_4   | <i>TET2</i>   | NM_001127208.2:c.3197_3198dup;p.(Arg1067Leufs*16) | InDel         | 34.0    |
| MDS_4   | <i>TP53</i>   | NM_000546.5:c.994-3C>G;p.?                        | Splice site   | 1.1     |
| MDS_5   | <i>BCOR</i>   | NM_001123385.2:c.2340dup;p.(Thr781Hisfs*36)       | InDel         | 9.5     |
| MDS_5   | <i>ETNK1</i>  | NM_018638.4:c.731A>G;p.(Asn244Ser)                | Missense      | 5.5     |
| MDS_5   | <i>RUNX1</i>  | NM_001754.4:c.431T>C;p.(Leu144Pro)                | Missense      | 18.8    |
| MDS_5   | <i>SRSF2</i>  | NM_003016.4:c.284C>G p.(Pro95Arg)                 | Missense      | 25.8    |
| MDS_5   | <i>TET2</i>   | NM_001127208.2:c.3908G>A;p.(Ser1303Asn)           | Missense      | 16.1    |
| MDS_5   | <i>TET2</i>   | NM_001127208.2:c.1630C>T;p.(Arg544*)              | Nonsense      | 27.0    |
| MDS_6   | <i>IDH1</i>   | NM_005896.3: c.394C>T p.(Arg132Cys)               | Missense      | 4.3     |
| MDS_7   | <i>SRSF2</i>  | NM_003016.4:c.284C>A p.(Pro95His)                 | Missense      | 11.6    |
| MDS_7   | <i>TET2</i>   | NM_001127208.2:c.2147C>G;p.(Ser716*)              | Nonsense      | 10.3    |
| MDS_7   | <i>RUNX1</i>  | NM_001754.4:602G>A p.(Glu138Lys)                  | Missense      | 11.9    |
| MDS_7   | <i>STAG2</i>  | NM_001042750.2:c.1644dup;p.(Thr549Tyrfs*11)       | InDel         | 20.6    |
| MDS_7   | <i>BCOR</i>   | NM_001123385.2:c.2972_2976del;p.(Leu991Profs*25)  | InDel         | 21.9    |
| MDS_8   | <i>BCORL1</i> | NM_021946.4:c.1202C>T;p.(Thr401Met)               | Missense      | 19.5    |
| MDS_8   | <i>GATA2</i>  | NM_001145661.2:c.952G>A;p.(Ala318Thr)             | Missense      | 17.3    |
| MDS_8   | <i>RUNX1</i>  | NM_001754.4:c.749delinsCC;p.(Arg250Profs*11)      | InDel         | 15.7    |
| MDS_8   | <i>SF3B1</i>  | NM_012433.3:c.2098A>G p.(Lys700Glu)               | Missense      | 18.0    |
| MDS_9   | <i>SF3B1</i>  | NM_012433.3:c.2098A>G p.(Lys700Glu)               | Missense      | 52.5    |
| MDS_9   | <i>TET2</i>   | NM_001127208.2:c.4636C>T;p.(Gln1546*)             | Nonsense      | 43.7    |
| MDS_10  | <i>TET2</i>   | NM_001127208.2:c.4210C>T;p.(Arg1404*)             | Nonsense      | 2.9     |
| MDS_10  | <i>TET2</i>   | NM_001127208.2:c.3781C>T;p.R1261C                 | Missense      | 20.3    |
| MDS_10  | <i>ZRSR2</i>  | NM_005089.3:c.900_901del;p.(Glu300Aspfs*16)       | InDel         | 39.0    |
| MDS_11  | <i>ASXL1</i>  | NM_015338.6:c.2904dup;p.(Asp969*)                 | InDel         | 20.6    |
| MDS_11  | <i>TET2</i>   | NM_001127208.2:c.4183-2A>G;p.?                    | Splice site   | 2.4     |
| MDS_11  | <i>TET2</i>   | NM_001127208.2:c.3532del;p.E1178Kfs*48            | InDel         | 17.6    |
| MDS_11  | <i>TET2</i>   | NM_001127208.2:c.4546C>T;p.(Arg1516*)             | Nonsense      | 22.4    |
| MDS_11  | <i>TP53</i>   | NM_000546.5:c.665C>T;p.(Pro222Leu)                | Missense      | 40.2    |
| MDS_11  | <i>U2AF1</i>  | NM_001025203.1:c.470A>C p.(Gln157Pro)             | Missense      | 20.2    |

| Subject | Gene   | Variant                                        | Mutation type | VAF [%] |
|---------|--------|------------------------------------------------|---------------|---------|
| MDS_12  | ASXL1  | NM_015338.6:c.1900_1922del;p.(Glu635Argfs*15)  | InDel         | 2.1     |
| MDS_12  | ASXL1  | NM_015338.6:c.2082_2092del;p.(Gln695Alafs*19)  | InDel         | 15.3    |
| MDS_12  | ETNK1  | NM_018638.4:c.731A>G;p.(Asn244Ser)             | Missense      | 5.3     |
| MDS_12  | U2AF1  | NM_001025203.1:c.470A>C p.(Gln157Pro)          | Missense      | 20.2    |
| MDS_13  | SETBP1 | NM_015559.3:c.2602G>A;p.Asp868Asn              | Missense      | 4.7     |
| MDS_13  | SETBP1 | NM_015559.3:c.2608G>A (p.Gly870Ser)            | Missense      | 21.9    |
| MDS_13  | SF3B1  | NM_012433.3:c.2098A>G p.(Lys700Glu)            | Missense      | 26.4    |
| MDS_13  | TET2   | NM_001127208.2:c.4956del;p.(Gln1652Hisfs*43)   | InDel         | 1.1     |
| MDS_13  | TET2   | NM_001127208.2:c.4097G>A;R1366H                | Missense      | 1.8     |
| MDS_13  | TET2   | NM_001127208.2:c.5071del;p.(Ser1691Leufs*4)    | InDel         | 7.7     |
| MDS_14  | SRSF2  | NM_003016.4:c.284C>T p.(Pro95Leu)              | Missense      | 13.8    |
| MDS_14  | TET2   | NM_001127208.2:c.1776T>G;p.(Tyr592*)           | Nonsense      | 22.6    |
| MDS_14  | TET2   | NM_001127208.2:c.2193del;p.(Gln731Hisfs*20)    | InDel         | 24.8    |
| MDS_14  | RUNX1  | NM_001754.4:c.1274C>T;p.(Pro425Leu)            | Missense      | 14.2    |
| MDS_15  | TET2   | NM_001127208.2:c.4108G>A;p.(Gly1370Arg)        | Missense      | 3.8     |
| MDS_15  | DNMT3A | NM_175629.2:c.1131del;p.(Ser377Argfs*30)       | InDel         | 1.6     |
| MDS_15  | DNMT3A | NM_175629.2:c.1628G>C;p.(Gly543Ala)            | Missense      | 6.0     |
| MDS_15  | TP53   | NM_000546.5:c.377A>G;p.(Tyr126Cys)             | Missense      | 3.7     |
| MDS_15  | KRAS   | NM_033360.4:c.35G>C (p.Gly12Ala)               | Missense      | 1.1     |
| MDS_16  | SRSF2  | NM_003016.4:c.284C>T p.(Pro95Leu)              | Missense      | 17.2    |
| MDS_16  | RUNX1  | NM_001754.4:c.422C>T;p.(Ser141Leu)             | Missense      | 1.9     |
| MDS_16  | RUNX1  | NM_001754.4:c.412G>T;p.(Glu138*)               | Nonsense      | 23.6    |
| MDS_17  | MPL    | NM_005373.2:c.1771T>G;p.(Tyr591Asp)            | Missense      | 41.0    |
| MDS_18  | DNMT3A | NM_175629.2:c.2645G>C; p.(Arg882Pro)           | Missense      | 28.0    |
| MDS_18  | TET2   | NM_001127208.2:c.2553del; p.(Glu852Asnfs*21)   | InDel         | 30.0    |
| MDS_18  | TET2   | NM_001127208.2:c.2243del; p.(Leu748Tyrfs*3)    | InDel         | 20.0    |
| MDS_18  | TET2   | NM_001127208.2:c.3784C>T; p.(Arg1262Trp)       | Missense      | 7.6     |
| MDS_18  | SRSF2  | NM_003016.4:c.284C>T p.(Pro95Leu)              | Missense      | 1.5     |
| MDS_19  | ASXL1  | NM_015338.5:c.1900_1922del; p.(Glu635Argfs*15) | InDel         | 35.0    |
| MDS_19  | EZH2   | NM_004456.4:c.1981A>T; p.(Lys661*)             | Nonsense      | 45.0    |
| MDS_19  | RUNX1  | NM_001754.4:c.492_493insGG; p.(Arg166Valfs*11) | InDel         | 13.0    |
| MDS_19  | STAG2  | NM_001042749.2:c.1117-1G>C;p.?                 | Splice site   | 9.0     |
| MDS_19  | TET2   | NM_001127208.2:c.4075C>T; p.(Arg1359Cys)       | Missense      | 12.0    |
| MDS_19  | TET2   | NM_001127208.2:c.1326delC; p.(Asn442Lysfs*5)   | InDel         | 2.0     |
| MDS_20  | ASXL1  | NM_015338.5:c.1934dup (p.Gly646Trpfs*12)       | InDel         | 22.0    |
| MDS_20  | BCOR   | NM_001123385.1:c.359C>G; p.(Pro120Arg)         | Missense      | 52.0    |
| MDS_20  | JAK2   | NM_004972.3:c.1972G>T; p.(Ala658Ser)           | Missense      | 37.0    |
| MDS_20  | RUNX1  | NM_001754.4:c.1167dup; p.(Gln390Alafs*210)     | InDel         | 34.0    |
| MDS_21  | ASXL1  | NM_015338.5:c.1900_1922del; p.(Glu635Argfs*15) | InDel         | 22.0    |
| MDS_21  | CBL    | NM_005188.3:c.1249C>A; p.(Pro417Thr)           | Missense      | 21.0    |
| MDS_21  | ETNK1  | NM_018638.4:c.728A>T; p.(His243Leu)            | Missense      | 18.0    |
| MDS_21  | EZH2   | NM_004456.4:c.540delA; p.(Gln180Hisfs*61)      | InDel         | 36.0    |
| MDS_21  | TET2   | NM_001127208.2:c.3594+3A>C;p.?                 | Splice site   | 20.0    |
| MDS_22  | SRSF2  | NM_003016.4:c.284C>T (p.Pro95Leu)              | Missense      | 27.0    |
| MDS_22  | TET2   | NM_001127208.2:c.4457C>G; p.(Ser1486*)         | Nonsense      | 41.0    |

| Subject | Gene   | Variant                                             | Mutation type | VAF [%] |
|---------|--------|-----------------------------------------------------|---------------|---------|
| MDS_22  | TET2   | NM_001127208.2:c.4138C>T; p.(His1380Tyr)            | Missense      | 35.0    |
| MDS_22  | ZRSR2  | NM_005089.3:c.491del; p.(Val164Glufs*74)            | InDel         | 72.0    |
| MDS_23  | SF3B1  | NM_012433.3:c.2098A>G; p.(Lys700Glu)                | Missense      | 82.0    |
| MDS_24  | DNMT3A | NM_175629.2:c.2645G>C; p.(Arg882Pro)                | Missense      | 32.0    |
| MDS_24  | SF3B1  | NM_012433.3:c.1866G>T; p.(Glu622Asp)                | Missense      | 36.0    |
| MDS_24  | TET2   | NM_001127208.2:c.5618T>C; p.(Ile1873Thr)            | Missense      | 16.0    |
| MDS_25  | DNMT3A | NM_175629.2:c.2206C>T; p.(Arg736Cys)                | Missense      | 12.0    |
| MDS_25  | RUNX1  | NM_001754.4:c.611G>A; p.(Arg204Gln)                 | Missense      | 38.0    |
| MDS_25  | TET2   | NM_001127208.2:c.3415_3418del; p.(Ile1139Leufs*12)  | InDel         | 3.1     |
| MDS_25  | WT1    | NM_024426.5:c.1453C>T; p.[Arg485Trp]                | Missense      | 40.0    |
| MDS_26  | MPL    | NM_005373.2:c.1544G>T; p.(Trp515Leu)                | Missense      | 56.0    |
| MDS_26  | TET2   | NM_001127208.2:c.2713del; p.(Asp905Ilefs*16)        | InDel         | 35.0    |
| MDS_27  | RUNX1  | NM_001754.4:c.356_358dup; p.(Val119dup)             | InDel         | 7.0     |
| MDS_27  | TP53   | NM_000546.5:c.814G>A; p.(Val272Met)                 | Missense      | 13.0    |
| MDS_27  | TP53   | NM_000546.5:c.273G>A; p.(Trp91*)                    | Nonsense      | 10.0    |
| MDS_28  | ASXL1  | NM_015338.5:c.1934dup (p.Gly646Trpfs*12)            | InDel         | 23.0    |
| MDS_28  | KIT    | NM_000222.2:c.2447A>T; p.(Asp816Val)                | Missense      | 12.0    |
| MDS_28  | SETBP1 | NM_015559.3:c.2608G>A; p.(Gly870Ser)                | Missense      | 6.0     |
| MDS_28  | SETBP1 | NM_015559.3:c.2602G>A; p.(Asp868Asn)                | Missense      | 3.0     |
| MDS_28  | STAT3  | NM_139276.2:c.1846G>A; p.(Glu616Lys)                | Missense      | 2.6     |
| MDS_28  | TP53   | NM_000546.5:c.743G>A; p.(Arg248Gln)                 | Missense      | 7.0     |
| MDS_29  | DNMT3A | NM_175629.2:c.1093T>A; p.(Tyr365Asn)                | Missense      | 4.0     |
| MDS_29  | SRSF2  | NM_003016.4:c.284C>T; (p.Pro95Leu)                  | Missense      | 1.4     |
| MDS_29  | TET2   | NM_001127208.2:c.4264A>T; p.(Lys1422*)              | Nonsense      | 2.5     |
| MDS_29  | TET2   | NM_001127208.2:c.4774dup; p.(Thr1592Asnfs*22)       | InDel         | 2.0     |
| MDS_30  | SF3B1  | NM_012433.3:c.2098A>G; p.(Lys700Glu)                | Missense      | 45.0    |
| MDS_30  | TET2   | NM_001127208.2:c.4109G>A; p.(Gly1370Glu)            | Missense      | 30.0    |
| MDS_30  | TET2   | NM_001127208.2:c.4211_4217del; p.(Arg1404Leufs*42)  | InDel         | 23.0    |
| MDS_31  | ASXL1  | NM_015338.5:c.1934dup; (p.Gly646Trpfs*12)           | InDel         | 13.0    |
| MDS_31  | RUNX1  | NM_001754.4:c.602G>A; p.(Arg201Gln)                 | Missense      | 28.0    |
| MDS_31  | SRSF2  | NM_003016.4:c.284C>A; p.(Pro95His)                  | Missense      | 25.0    |
| MDS_31  | STAG2  | NM_001042749.2:c.3034C>T; p.(Arg1012*)              | Nonsense      | 31.0    |
| MDS_32  | BCOR   | NM_001123385.1:c.2375del; p.(Asn792Ilefs*15)        | InDel         | 4.7     |
| MDS_32  | DNMT3A | NM_175629.2:c.2098C>G; p.(Pro700Ala)                | Missense      | 1.1     |
| MDS_33  | SF3B1  | NM_012433.3:c.2098A>G; p.(Lys700Glu)                | Missense      | 27.0    |
| MDS_34  | ASXL2  | NM_018263.5:442C>T; p.(Gln148*)                     | Nonsense      | 35.0    |
| MDS_34  | FLT3   | FLT3-ITD (66nt)                                     | InDel         | 27.0    |
| MDS_34  | SF3B1  | NM_012433.3:c.2098A>G; p.(Lys700Glu)                | Missense      | 37.0    |
| MDS_84  | MPL    | NM_005373.2:c.1654-10T>A                            | Splice site   | 15.3    |
| MDS_35  | DNMT3A | NM_175629.2:c.788_789dup; p.(Pro264Serfs*53)        | InDel         | 33.0    |
| MDS_35  | SF3B1  | NM_012433.3:c.2098A>G; p.(Lys700Glu)                | Missense      | 37.0    |
| MDS_35  | TET2   | NM_001127208.2:c.1389_1411dup; p.(Ser471Ilefs*23)   | InDel         | 42.0    |
| MDS_35  | TET2   | NM_001127208.2:c.2872_2873delCA; p.(Gln958Glufs*13) | InDel         | 36.0    |
| MDS_35  | TET2   | NM_001127208.2:c.4075C>A; p.(Arg1359Ser)            | Missense      | 6.3     |
| MDS_36  | DNMT3A | NM_175629.2:c.1851+5G>A;p.?                         | Splice site   | 3.8     |

| Subject | Gene          | Variant                                              | Mutation type | VAF [%] |
|---------|---------------|------------------------------------------------------|---------------|---------|
| MDS_36  | <i>TP53</i>   | NM_000546.5:c.466_477dup; p.(Arg156_Ala159dup)       | InDel         | 3.0     |
| MDS_37  | <i>DNMT3A</i> | NM_175629.2:c.1475-1G>C;p.?                          | Splice site   | 44.0    |
| MDS_37  | <i>SF3B1</i>  | NM_012433.3:c.1972T>G; p.(Trp658Gly)                 | Missense      | 21.0    |
| MDS_37  | <i>SF3B1</i>  | NM_012433.3:c.1997A>G; p.(Lys666Arg)                 | Missense      | 6.0     |
| MDS_37  | <i>SF3B1</i>  | NM_012433.3:c.1973G>T; p.(Trp658Leu)                 | Missense      | 6.0     |
| MDS_37  | <i>SF3B1</i>  | NM_012433.3:c.1866G>C; p.(Glu622Asp)                 | Missense      | 2.1     |
| MDS_38  | <i>RUNX1</i>  | NM_001754.4:c.611G>A; p.(Arg204Gln)                  | Missense      | 6.0     |
| MDS_38  | <i>RUNX1</i>  | NM_001754.4:c.602G>A; p.(Arg201Gln)                  | Missense      | 2.3     |
| MDS_38  | <i>RUNX1</i>  | NM_001754.4:c.858_860dup; p.(Tyr287*)                | InDel         | 1.5     |
| MDS_38  | <i>SH2B3</i>  | NM_005475.2:c.1168delC; p.(Leu390Trpfs*21)           | InDel         | 6.0     |
| MDS_38  | <i>SRSF2</i>  | NM_003016.4:c.284C>G; p.(Pro95Arg)                   | Missense      | 21.0    |
| MDS_38  | <i>TET2</i>   | NM_001127208.2:c.3646C>T; p.(Arg1216*)               | Nonsense      | 23.0    |
| MDS_38  | <i>TET2</i>   | NM_001127208.2:c.1454_1455delTG; p.(Val485Glufs*4)   | InDel         | 15.0    |
| MDS_38  | <i>TP53</i>   | NM_000546.5:c.646G>A; p.(Val216Met)                  | Missense      | 7.0     |
| MDS_38  | <i>TP53</i>   | NM_000546.5:c.743G>A; p.(Arg248Gln)                  | Missense      | 2.2     |
| MDS_39  | <i>TET2</i>   | NM_001127208.2:c.5500_5501delCA; p.(Gln1834Glyfs*11) | InDel         | 1.9     |
| MDS_40  | <i>U2AF1</i>  | NM_001025203.1:c.101C>T; p.(Ser34Phe)                | Missense      | 24.0    |
| MDS_41  | <i>DDX41</i>  | NM_016222.4:c.209dup; p.(Arg71Profs*4)               | InDel         | 39.0    |
| MDS_41  | <i>TERT</i>   | ENST00000310581:c.3037C>T; p.[His1013Tyr]            | Missense      | 1.3     |
| MDS_42  | <i>SF3B1</i>  | NM_012433.3:c.2098A>G; p.(Lys700Glu)                 | Missense      | 46.4    |
| MDS_42  | <i>MPL</i>    | NM_005373.2:c.1544G>C; p.(Trp515Ser)                 | Missense      | 8.0     |
| MDS_43  | <i>ASXL1</i>  | NM_015338.5:c.1934dup; (p.Gly646Trpfs*12)            | InDel         | 1.6     |
| MDS_43  | <i>DNMT3A</i> | NM_175629.2:c.976C>A; p.(Arg326Ser)                  | Missense      | 30.0    |
| MDS_43  | <i>DNMT3A</i> | NM_175629.2:c.2644C>T; p.(Arg882Cys)                 | Missense      | 1.5     |
| MDS_43  | <i>SF3B1</i>  | NM_012433.3:c.2098A>G; p.(Lys700Glu)                 | Missense      | 32.0    |
| MDS_43  | <i>SH2B3</i>  | NM_005475.2:c.1090T>C;p.(Trp364Arg)                  | Missense      | 2.8     |
| MDS_44  | <i>ASXL1</i>  | NM_015338.5:c.1934dup; (p.Gly646Trpfs*12)            | InDel         | 19.0    |
| MDS_44  | <i>IDH1</i>   | NM_005896.3:c.395G>A; p.(Arg132His)                  | Missense      | 1.4     |
| MDS_44  | <i>IDH2</i>   | NM_002168.3:c.419G>A; p.(Arg140Gln)                  | Missense      | 27.0    |
| MDS_44  | <i>SRSF2</i>  | NM_003016.4:c.284C>G; p.(Pro95Arg)                   | Missense      | 29.0    |
| MDS_44  | <i>STAG2</i>  | NM_001042749.2:c.3097C>T; p.(Arg1033*)               | Nonsense      | 36.0    |
| MDS_45  | <i>SF3B1</i>  | NM_012433.3:c.1997A>G; p.(Lys666Arg)                 | Missense      | 24.0    |
| MDS_45  | <i>ASXL1</i>  | NM_015338.6:c.2827del;p.(Asp943Ilefs*2)              | InDel         | 1.3     |
| MDS_46  | <i>DDX41</i>  | NM_016222.4:c.1016C>T; p.(Pro339Leu)                 | Missense      | 15.0    |
| MDS_47  | <i>ASXL1</i>  | NM_015338.6:c.1934dup p.(Gly646Trpfs*12)             | InDel         | 13.0    |
| MDS_47  | <i>RUNX1</i>  | NM_001754.4:c.931_934delACAA;p.(Thr311Profs*16)      | InDel         | 12.3    |
| MDS_48  | <i>SF3B1</i>  | NM_012433.3:c.2098A>G; p.(Lys700Glu)                 | Missense      | 32.0    |
| MDS_49  | <i>BCORL1</i> | NM_021946.4:c.[4619-1G>T];p.?                        | Splice site   | 83.0    |
| MDS_49  | <i>KRAS</i>   | NM_033360.3:c.34G>A; p.(Gly12Ser)                    | Missense      | 1.1     |
| MDS_49  | <i>NRAS</i>   | NM_002524.4:c.35G>C; p.(Gly12Ala)                    | Missense      | 24.0    |
| MDS_49  | <i>NRAS</i>   | NM_002524.4:c.37G>C; p.(Gly13Arg)                    | Missense      | 7.5     |
| MDS_49  | <i>NRAS</i>   | NM_002524.4:c.182A>G; p.(Gln61Arg)                   | Missense      | 1.1     |
| MDS_49  | <i>RUNX1</i>  | NM_001754.4:c.664delT; p.(Ser222Profs*15)            | InDel         | 43.0    |
| MDS_49  | <i>SF3B1</i>  | NM_012433.3:c.2098A>G; p.(Lys700Glu)                 | Missense      | 43.0    |
| MDS_49  | <i>TET2</i>   | NM_001127208.2:c.388delG; p.(Glu130Lysfs*15)         | InDel         | 43.0    |

| Subject | Gene          | Variant                                                              | Mutation type | VAF [%] |
|---------|---------------|----------------------------------------------------------------------|---------------|---------|
| MDS_50  | <i>DNMT3A</i> | NM_175629.2:c.2309C>T; p.(Ser770Leu)                                 | Missense      | 29.0    |
| MDS_50  | <i>SF3B1</i>  | NM_012433.3:c.1984C>T; p.(His662Tyr)                                 | Missense      | 33.0    |
| MDS_51  | <i>DNMT3A</i> | NM_175629.2: c.2645G>A; p.(Arg882His)                                | Missense      | 19.0    |
| MDS_51  | <i>DNMT3A</i> | NM_175629.2: c.1667+1G>A;p.?                                         | Splice site   | 2.3     |
| MDS_51  | <i>SF3B1</i>  | NM_012433.3:c.2098A>G; p.(Lys700Glu)                                 | Missense      | 19.0    |
| MDS_51  | <i>TET2</i>   | NM_001127208.2:c.1691G>A; p.(Trp564*)                                | Nonsense      | 2.3     |
| MDS_51  | <i>TET2</i>   | NM_001127208.2:c.4263C>G; p.(Tyr1421*)                               | Nonsense      | 1.4     |
| MDS_52  | <i>ASXL1</i>  | NM_015338.5:c.2290dup;p.(Leu764Profs*10)                             | InDel         | 1.3     |
| MDS_52  | <i>CBL</i>    | NM_005188.3:c.1202G>C;p.(Cys401Ser)                                  | Missense      | 1.3     |
| MDS_52  | <i>TET2</i>   | NM_001127208.2:c.3764dup;p.(Tyr1255*)                                | InDel         | 87.0    |
| MDS_53  | <i>ASXL1</i>  | NM_015338.5:c.1934dup;p.(Gly646Trpfs*12)                             | InDel         | 12.0    |
| MDS_53  | <i>MPL</i>    | NM_005373.2:c.1775G>A;p.(Arg592Gln)                                  | Missense      | 15.0    |
| MDS_53  | <i>U2AF1</i>  | NM_001025203.1:c.470A>C;p.(Gln157Pro)                                | Missense      | 21.0    |
| MDS_54  | <i>ASXL1</i>  | NM_015338.5:c.1819_1820delGG;p.(Gly607Leufs*11)                      | InDel         | 14.0    |
| MDS_54  | <i>SF3B1</i>  | NM_012433.3:c.2342A>G;p.(Asp781Gly)                                  | Missense      | 33.0    |
| MDS_54  | <i>TP53</i>   | NM_000546.5:c.818G>A;p.(Arg273His)                                   | Missense      | 34.0    |
| MDS_55  | <i>DNMT3A</i> | NM_175629.2:c.1429+1G>A;p.?                                          | Splice site   | 1.5     |
| MDS_56  | <i>DNMT3A</i> | NM_175629.2:c.2645G>A;p.(Arg882His)                                  | Missense      | 3.7     |
| MDS_56  | <i>SRSF2</i>  | NM_003016.4:c.284_307delCCCCGGACTCACACCACAGCCGCC;p.(Pro95_Arg102del) | InDel         | 15.0    |
| MDS_56  | <i>TET2</i>   | NM_001127208.2:c.3894dup;p.(Lys1299*)                                | InDel         | 16.0    |
| MDS_57  | <i>ASXL1</i>  | NM_015338.5:c.2324T>G;p.(Leu775*)                                    | Nonsense      | 1.1     |
| MDS_57  | <i>SF3B1</i>  | NM_012433.3:c.1874G>T;p.(Arg625Leu)                                  | Missense      | 6.4     |
| MDS_57  | <i>TET2</i>   | NM_001127208.2:c.3658delA;p.(Thr1220Profs*6)                         | InDel         | 7.7     |
| MDS_58  | <i>RAD21</i>  | NM_006265.3:c.1064C>T;p.(Pro355Leu)                                  | Missense      | 21.4    |
| MDS_58  | <i>SRSF2</i>  | NM_003016.4:c.284_307delCCCCGGACTCACACCACAGCCGCC;p.(Pro95_Arg102del) | InDel         | 23.4    |
| MDS_58  | <i>TET2</i>   | NM_001127208.2:c.4044+1G>C;p.?                                       | Splice site   | 10.0    |
| MDS_59  | <i>DNMT3A</i> | NM_175629.2:c.2612delC;p.(Pro871Glnfs*10)                            | InDel         | 3.7     |
| MDS_59  | <i>SF3B1</i>  | NM_012433.3:c.1868A>G;p.(Tyr623Cys)                                  | Missense      | 24.0    |
| MDS_59  | <i>SRSF2</i>  | NM_003016.4:c.[283C>G];p.(Pro95Ala)                                  | Missense      | 3.8     |
| MDS_59  | <i>TET2</i>   | NM_001127208.2:c.3862G>C;p.(Gly1288Arg)                              | Missense      | 2.2     |
| MDS_60  | <i>RUNX1</i>  | NM_001754.4:c.292delC;p.(Leu98Serfs*24)                              | InDel         | 1.7     |
| MDS_60  | <i>SRSF2</i>  | NM_003016.4:c.284_307delCCCCGGACTCACACCACAGCCGCC;p.(Pro95_Arg102del) | InDel         | 26.0    |
| MDS_60  | <i>TET2</i>   | NM_001127208.2:c.3921delG;p.(Lys1308Serfs*55)                        | InDel         | 1.8     |
| MDS_60  | <i>TET2</i>   | NM_001127208.2:c.327delC;p.(Lys110Argfs*3)                           | InDel         | 4.0     |
| MDS_61  | <i>ASXL1</i>  | NM_015338.5:c.1934dup;p.(Gly646Trpfs*12)                             | InDel         | 30.0    |
| MDS_61  | <i>BRAF</i>   | NM_001354609.2:c.602A>G;p.(Gln201Arg)                                | Missense      | 44.0    |
| MDS_61  | <i>EZH2</i>   | NM_004456.5:c.324delC;p.(Ile109*)                                    | InDel         | 51.0    |
| MDS_61  | <i>FLT3</i>   | NM_004119.3:c.2523C>A;p.(Asn841Lys)                                  | Missense      | 40.0    |
| MDS_61  | <i>GATA2</i>  | NM_001145661.2:c.229+1G>T;p.?                                        | Splice site   | 40.0    |
| MDS_61  | <i>RUNX1</i>  | NM_001754.4:c.[1207_1210dup]; p.(His404Leufs*197)                    | InDel         | 4.2     |
| MDS_61  | <i>RUNX1</i>  | NM_001754.4:c.[951_952delTT];p.(Ser318Glnfs*281)                     | InDel         | 34.0    |
| MDS_62  | <i>ASXL1</i>  | NM_015338.5:c.1934dup;p.(Gly646Trpfs*12)                             | InDel         | 12.3    |
| MDS_62  | <i>CEBPA</i>  | NM_004364:c.514C>T;p.(Gln172*)                                       | Nonsense      | 19.0    |

| Subject | Gene          | Variant                                            | Mutation type | VAF [%] |
|---------|---------------|----------------------------------------------------|---------------|---------|
| MDS_62  | <i>SF3B1</i>  | NM_012433.3:c.1873C>T;p.(Arg625Cys)                | Missense      | 15.0    |
| MDS_62  | <i>STAG2</i>  | NM_001042750.2STAG2:c.1907dup;p.(Tyr636*)          | InDel         | 30.0    |
| MDS_62  | <i>TET2</i>   | NM_001127208.2:c.1813_1814delTA;p.(Tyr605Hisfs*32) | InDel         | 8.4     |
| MDS_62  | <i>TET2</i>   | NM_001127208.2:c.5456delT;p.(Leu1819*)             | InDel         | 18.0    |
| MDS_63  | <i>CBL</i>    | NM_005188.3:c.1222T>G;p.(Trp408Gly)                | Missense      | 16.3    |
| MDS_63  | <i>MPL</i>    | NM_005373.3:c.545C>A; p.(Pro182His)                | Missense      | 2.9     |
| MDS_63  | <i>NOTCH1</i> | ENST00000277541:c.7541_7542delCT;p.Pro2514fs       | InDel         | 1.6     |
| MDS_63  | <i>TET2</i>   | NM_001127208.2:c.4029_4030insC; p.(Ala1344Argfs*3) | InDel         | 34.6    |
| MDS_64  | <i>CBL</i>    | NM_005188.3:c.1256G>A;p.(Cys419Tyr)                | Missense      | 11.0    |
| MDS_64  | <i>EZH2</i>   | NM_004456.5:c.2198A>G;p.(Tyr733Cys)                | Missense      | 35.9    |
| MDS_64  | <i>TET2</i>   | NM_001127208.2:c.5269delC;p.(His1757Ilefs*6)       | InDel         | 19.7    |
| MDS_65  | <i>CSF3R</i>  | NM_156039.3:c.2302C>T;p.(Gln768*)                  | Nonsense      | 2.5     |
| MDS_65  | <i>CSF3R</i>  | NM_156039.3:c.2337T>A; p.(Tyr779*)                 | Nonsense      | 24.2    |
| MDS_65  | <i>DNMT3A</i> | NM_175629.2:c.2645G>A p.(Arg882His)                | Missense      | 27.8    |
| MDS_65  | <i>U2AF1</i>  | NM_001025203.1:c.470A>G;p.(Gln157Arg)              | Missense      | 23.7    |
| MDS_66  | <i>TP53</i>   | NM_000546.5:c.427G>A; p.(Val143Met)                | Missense      | 27.4    |
| MDS_67  | <i>IDH1</i>   | NM_005896.3: c.394C>T p.(Arg132Cys)                | Missense      | 3.5     |
| MDS_67  | <i>RUNX1</i>  | NM_001754.4:c.293T>C; p.(Leu98Pro)                 | Missense      | 30.3    |
| MDS_67  | <i>U2AF1</i>  | NM_001025203.1:c.470A>C p.(Gln157Pro)              | Missense      | 36.1    |
| MDS_68  | <i>SF3B1</i>  | NM_012433.3:c.2098A>G p.(Lys700Glu)                | Missense      | 39.0    |
| MDS_69  | <i>DNMT3A</i> | NM_175629.2:c.1851+1G>A; p.?                       | Splice site   | 4.7     |
| MDS_69  | <i>TET2</i>   | NM_001127208.2:c.822del;p.(Asn275Ilefs*18)         | InDel         | 3.1     |
| MDS_69  | <i>TP53</i>   | NM_000546.5:c.473G>A;p.(Arg158His)                 | Missense      | 55.2    |
| MDS_70  | <i>ASXL1</i>  | NM_015338.6:c.2535dup;p.(Ser846Glnfs*5)            | InDel         | 33.0    |
| MDS_70  | <i>ETNK1</i>  | NM_018638.4:c.731A>G;p.(Asn244Ser)                 | Missense      | 7.8     |
| MDS_70  | <i>U2AF1</i>  | NM_001025203.1:c.470A>C p.(Gln157Pro)              | Missense      | 6.9     |
| MDS_70  | <i>CALR</i>   | NM_004343.3:c.1099_1150del;p.(Leu367Thrfs*46)      | InDel         | 1.8     |
| MDS_71  | <i>ASXL1</i>  | NM_015338.6:c.1804G>T;p.(Glu602*)                  | Nonsense      | 39.8    |
| MDS_71  | <i>CBL</i>    | NM_005188.3:c.1151G>T;p.(Cys384Phe)                | Missense      | 13.4    |
| MDS_71  | <i>ETNK1</i>  | NM_018638.4:c.731A>G;p.(Asn244Ser)                 | Missense      | 1.7     |
| MDS_71  | <i>SETBP1</i> | NM_015559.3:c.2608G>A (p.Gly870Ser)                | Missense      | 40.7    |
| MDS_71  | <i>SRSF2</i>  | NM_003016.4:c.284C>T p.(Pro95Leu)                  | Missense      | 27.9    |
| MDS_71  | <i>ZRSR2</i>  | NM_005089.3:c.1318_1319insCGGCC;p.(Arg440Profs*?)  | InDel         | 36.0    |
| MDS_72  | <i>DNMT3A</i> | NM_175629.2:c.2628C>A;p.(Asp876Glu)                | Missense      | 38.3    |
| MDS_72  | <i>DNMT3A</i> | NM_175629.2:c.2408+1G>A;p.?                        | Splice site   | 40.5    |
| MDS_72  | <i>SF3B1</i>  | NM_012433.3:c.2098A>G p.(Lys700Glu)                | Missense      | 40.9    |
| MDS_72  | <i>TET2</i>   | NM_001127208.2:c.4115C>T;p.(Thr1372Ile)            | Missense      | 39.8    |
| MDS_73  | <i>JAK2</i>   | NM_004972.3:c.1849G>T p.(Val617Phe)                | Missense      | 31.4    |
| MDS_73  | <i>TET2</i>   | NM_001127208.2:c.2899C>T;p.(Gln967*)               | Nonsense      | 40.5    |
| MDS_73  | <i>TET2</i>   | NM_001127208.2:c.3594+4A>G;p.?                     | Splice site   | 42.3    |
| MDS_73  | <i>ZRSR2</i>  | NM_005089.3:c.959G>A;p.(Cys320Tyr)                 | Missense      | 81.6    |
| MDS_74  | <i>EZH2</i>   | NM_004456.5:c.2006G>A;p.(Ser669Asn)                | Missense      | 83.7    |
| MDS_74  | <i>RUNX1</i>  | NM_001754.4:c.602G>A;p.(Arg201Gln)                 | Missense      | 5.0     |
| MDS_74  | <i>SETBP1</i> | NM_015559.3:c.2602G>A p.(Asp868Asn)                | Missense      | 31.7    |
| MDS_74  | <i>SF3B1</i>  | NM_012433.3:c.1986C>G;p.(His662Gln)                | Missense      | 42.7    |

| Subject | Gene          | Variant                                       | Mutation type | VAF [%] |
|---------|---------------|-----------------------------------------------|---------------|---------|
| MDS_75  | <i>DDX41</i>  | NM_016222.2:c.1127C>T;p.(Ala376Val)           | Missense      | 6.0     |
| MDS_75  | <i>DNMT3A</i> | NM_175629.2:c.2723A>C;p.(Tyr908Ser)           | Missense      | 11.9    |
| MDS_75  | <i>TET2</i>   | NM_001127208.2:c.3865T>G;p.(Cys1289Gly)       | Missense      | 2.0     |
| MDS_76  | <i>DNMT3A</i> | NM_175629.2: c.2645G>A p.(Arg882His)          | Missense      | 14.3    |
| MDS_76  | <i>DNMT3A</i> | NM_175629.2:c.2327A>G;p.(Asn776Ser)           | Missense      | 17.9    |
| MDS_77  | <i>SF3B1</i>  | NM_012433.3:c.2098A>G p.(Lys700Glu)           | Missense      | 5.0     |
| MDS_77  | <i>RAD21</i>  | NM_006265.3:c.415_419del;p.(Arg139Glyfs*19)   | InDel         | 4.6     |
| MDS_78  | <i>TET2</i>   | NM_001127208.2:c.1397del;p.(Ser466Leufs*20)   | InDel         | 2.2     |
| MDS_78  | <i>TET2</i>   | NM_001127208.2:c.4546C>T;p.(Arg1516*)         | Nonsense      | 20.3    |
| MDS_78  | <i>TET2</i>   | NM_001127208.2:c.3410-4A>G;p.?                | Splice site   | 43.8    |
| MDS_78  | <i>DNMT3A</i> | NM_175629.2:c.1302del;p.(Val435Cysfs*216)     | InDel         | 44.9    |
| MDS_78  | <i>SH2B3</i>  | NM_005475.2:c.1153G>C;p.(Ala385Pro)           | Missense      | 1.9     |
| MDS_78  | <i>JAK2</i>   | NM_004972.3:c.1849G>T;p.(Val617Phe)           | Missense      | 2.5     |
| MDS_79  | <i>TP53</i>   | NM_000546.5:c.559+1G>T;p.?                    | Splice site   | 36.5    |
| MDS_80  | <i>SRSF2</i>  | NM_003016.4:c.284C>A p.(Pro95His)             | Missense      | 35.2    |
| MDS_80  | <i>ASXL1</i>  | NM_015338.6:c.1904_1905del;p.(Glu635Glyfs*22) | InDel         | 37.6    |
| MDS_80  | <i>RUNX1</i>  | NM_001754.4:c.998dup;p.(Arg334Alafs*266)      | InDel         | 33.8    |
| MDS_80  | <i>KRAS</i>   | NM_033360.4:c.437C>T p.(Ala146Val)            | Missense      | 4.0     |
| MDS_81  | <i>JAK2</i>   | NM_004972.3:c.1849G>T p.(Val617Phe)           | Missense      | 5.0     |
| MDS_81  | <i>U2AF1</i>  | NM_001025203.1:c.470A>G p.(Gln157Arg)         | Missense      | 11.0    |
| MDS_82  | <i>TET2</i>   | NM_001127208.2:c.3671del;p.(Ala1224Glyfs*2)   | InDel         | 1.8     |
| MDS_82  | <i>TP53</i>   | NM_000546.5:c.659A>G;p.(Tyr220Cys)            | Missense      | 18.5    |
| MDS_82  | <i>BRAF</i>   | NM_004333.4:c.1406G>C;p.(Gly469Ala)           | Missense      | 1.1     |
| MDS_82  | <i>ZBTB7A</i> | NM_015898.4:c.231del;p.(Ile77Metfs*43)        | InDel         | 5.3     |
| MDS_83  | <i>SRSF2</i>  | NM_003016.4:c.284C>A p.(Pro95His)             | Missense      | 46.6    |
| MDS_83  | <i>ASXL1</i>  | NM_015338.6:c.2182G>T;p.(Glu728*)             | Nonsense      | 41.0    |
| MDS_83  | <i>STAG2</i>  | NM_001042750.2:c.1840C>T p.(Arg614*)          | Nonsense      | 86.0    |
| AML_1   | <i>ASXL1</i>  | NM_015338:exon12:c.1927dupG;p.G642fs          | InDel         | 11.6    |
| AML_1   | <i>BCOR</i>   | NM_001123385:exon7:c.3446_3447del;p.A1149fs   | InDel         | 63.9    |
| AML_1   | <i>BCOR</i>   | NM_001123385:exon7:c.3444_3446G               | InDel         | 35.2    |
| AML_1   | <i>CSF3R</i>  | NM_156039:exon17:c.2436_2437insGCAG;p.S813fs  | InDel         | 1.2     |
| AML_1   | <i>IDH2</i>   | NM_002168:exon4:c.419G>A;p.R140Q              | Missense      | 32.7    |
| AML_1   | <i>NRAS</i>   | NM_002524:exon2:c.35G>T;p.G12V                | Missense      | 18.9    |
| AML_1   | <i>PHF6</i>   | NM_032458:exon9:c.954dupA;p.S318fs            | InDel         | 5.9     |
| AML_1   | <i>RUNX1</i>  | NM_001754:exon9:c.1141_1142insCGCC;p.L381fs   | InDel         | 31.8    |
| AML_1   | <i>SRSF2</i>  | NM_003016:exon1:c.284C>A;p.P95H               | Missense      | 2.5     |
| AML_1   | <i>STAG2</i>  | NM_001042750:exon15:c.1409delA;p.E470fs       | InDel         | 61.0    |
| AML_1   | <i>TET2</i>   | NM_001127208:exon3:c.2692G>T;p.G898X          | Nonsense      | 4.0     |
| AML_2   | <i>ASXL1</i>  | NM_015338:exon12:c.1927dupG;p.G642fs          | InDel         | 18.4    |
| AML_2   | <i>CEBPA</i>  | NM_004364:exon1:c.898C>T;p.R300C              | Missense      | 25.1    |
| AML_2   | <i>RUNX1</i>  | NM_001754:exon4:c.317G>T;p.W106L              | Missense      | 33.8    |
| AML_2   | <i>STAG2</i>  | NM_001042750:exon24:c.2308C>T;p.Q770X         | Nonsense      | 27.6    |
| AML_2   | <i>U2AF1</i>  | NM_001025203:exon6:c.470A>C;p.Q157P           | Missense      | 28.8    |
| AML_3   | <i>ASXL1</i>  | NM_015338:exon12:c.1927dupG;p.G642fs          | InDel         | 15.2    |
| AML_3   | <i>BRAF</i>   | NM_004333:c.1790T>A;p.L597Q                   | Missense      | 90.5    |

| Subject | Gene          | Variant                                                                                                                | Mutation type | VAF [%] |
|---------|---------------|------------------------------------------------------------------------------------------------------------------------|---------------|---------|
| AML_3   | <i>EZH2</i>   | NM_004456:exon19:c.2186T>C:p.F729S                                                                                     | Missense      | 92.3    |
| AML_3   | <i>IDH2</i>   | NM_002168:exon4:c.419G>A:p.R140Q                                                                                       | Missense      | 46.4    |
| AML_3   | <i>RUNX1</i>  | NM_001754:exon4:c.329A>C:p.K110T                                                                                       | Missense      | 3.1     |
| AML_3   | <i>STAG2</i>  | NM_001042750:exon20:c.1840C>T:p.R614X                                                                                  | Nonsense      | 5.5     |
| AML_3   | <i>STAG2</i>  | NM_001042750:exon21:c.2086_2096del:p.A696fs                                                                            | InDel         | 7.9     |
| AML_3   | <i>STAG2</i>  | NM_001042750:exon31:c.3394_3395insTA:p.L1132fs                                                                         | InDel         | 27.9    |
| AML_4   | <i>ASXL1</i>  | NM_015338:exon12:c.2077C>T:p.R693X                                                                                     | Nonsense      | 8.6     |
| AML_4   | <i>KRAS</i>   | NM_033360:exon2:c.35G>A:p.G12D                                                                                         | Missense      | 38.3    |
| AML_5   | <i>FLT3</i>   | NM_004119:exon20:c.2508_2510del:p.836_837del                                                                           | InDel         | 7.2     |
| AML_5   | <i>U2AF1</i>  | NM_001025203:exon2:c.101C>T:p.S34F                                                                                     | Missense      | 50.9    |
| AML_6   | <i>ASXL1</i>  | NM_015338:exon12:c.2160delC:p.D720fs                                                                                   | InDel         | 42.9    |
| AML_6   | <i>RUNX1</i>  | NM_001754:exon6:c.610C>T:p.R204X                                                                                       | Nonsense      | 38.6    |
| AML_6   | <i>SRSF2</i>  | NM_003016:exon1:c.284C>A:p.P95H                                                                                        | Missense      | 41.9    |
| AML_6   | <i>TET2</i>   | NM_001127208:exon3:c.757_770del:p.N253fs                                                                               | InDel         | 40.0    |
| AML_7   | <i>IDH1</i>   | NM_005896:exon4:c.394C>T:p.R132C                                                                                       | Missense      | 44.6    |
| AML_7   | <i>RUNX1</i>  | NM_001754:exon5:c.369dupT:p.V124fs                                                                                     | InDel         | 47.2    |
| AML_7   | <i>SRSF2</i>  | NM_003016:exon1:c.284C>T:p.P95L                                                                                        | Missense      | 40.4    |
| AML_7   | <i>TET2</i>   | NM_001127208:exon11:c.5482C>T:p.Q1828X                                                                                 | Nonsense      | 99.0    |
| AML_8   | <i>BCOR</i>   | NM_001123385:exon11:c.4428+2T>G,p.?                                                                                    | Splice site   | 50.8    |
| AML_8   | <i>BCORL1</i> | NM_021946:exon3:c.398_399insCGGT:p.S133fs                                                                              | InDel         | 50.2    |
| AML_8   | <i>DNMT3A</i> | NM_175629:exon23:c.2644C>T:p.R882C                                                                                     | Missense      | 56.4    |
| AML_8   | <i>KIT</i>    | NM_000222:exon8:c.1256_1261del:p.419_421del                                                                            | InDel         | 41.3    |
| AML_8   | <i>RUNX1</i>  | NM_001754:exon9:c.1007_1008insAGGGCCC:p.F336fs                                                                         | InDel         | 41.0    |
| AML_8   | <i>SF3B1</i>  | NM_012433:exon15:c.2098A>G:p.K700E                                                                                     | Missense      | 48.0    |
| AML_9   | <i>DNMT3A</i> | NM_175629:exon23:c.2645G>A:p.R882H                                                                                     | Missense      | 34.5    |
| AML_9   | <i>IDH2</i>   | NM_002168:exon4:c.419G>A:p.R140Q                                                                                       | Missense      | 39.5    |
| AML_9   | <i>RUNX1</i>  | NM_001754:exon9:c.1015_1016insCAGTTCCCCGCGC:p.L339fs                                                                   | InDel         | 27.1    |
| AML_10  | <i>ETV6</i>   | NM_001987:exon3:c.313_314insT:p.R105fs                                                                                 | InDel         | 37.7    |
| AML_10  | <i>FLT3</i>   | NM_004119:exon14:c.1769_1770insTCAGCCCATCGGCTCCTCAGATAATGAGTACTT:p.F590delinsFQPIGSSDNEYF                              | InDel         | 25.3    |
| AML_10  | <i>NPM1</i>   | NM_002520:exon10:c.805_806insGGGCGC:p.I269delinsRAL                                                                    | InDel         | 37.9    |
| AML_11  | <i>DNMT3A</i> | NM_175629:exon13:c.1474+1G>A,p.?                                                                                       | Splice site   | 46.5    |
| AML_11  | <i>FLT3</i>   | NM_004119:exon14:c.1799_1800insGTCTCCTCCTCAGATAATGAGTACTTCTACGTTGATTTTCAGAGAATATGAATATGA:p.D600delinsESSDNEYFYVDFREYED | InDel         | 1.2     |
| AML_11  | <i>RUNX1</i>  | NM_001754:exon5:c.356dupT:p.V119fs                                                                                     | InDel         | 29.0    |
| AML_11  | <i>RUNX1</i>  | NM_001754:exon4:c.299_300insATCGCAGAGGAGCAA:p.S100delinsSSQRSN                                                         | InDel         | 9.5     |
| AML_11  | <i>STAG2</i>  | NM_001042750:exon28:c.2857C>T:p.R953X                                                                                  | Nonsense      | 26.2    |
| AML_11  | <i>U2AF1</i>  | NM_001025203:exon2:c.101C>A:p.S34Y                                                                                     | Missense      | 52.4    |
| AML_12  | <i>ASXL1</i>  | NM_015338:exon12:c.1888_1910del:p.H630fs                                                                               | InDel         | 33.9    |
| AML_12  | <i>IDH2</i>   | NM_002168:exon4:c.419G>A:p.R140Q                                                                                       | Missense      | 47.0    |
| AML_12  | <i>SRSF2</i>  | NM_003016:exon1:c.284C>A:p.P95H                                                                                        | Missense      | 42.6    |
| AML_12  | <i>STAG2</i>  | NM_001042750:exon20:c.1840C>T:p.R614X                                                                                  | Nonsense      | 14.6    |
| AML_12  | <i>STAG2</i>  | NM_001042750:exon29:c.3034C>T:p.R1012X                                                                                 | Nonsense      | 65.2    |
| AML_13  | <i>NRAS</i>   | NM_002524:exon2:c.38G>A:p.G13D                                                                                         | Missense      | 39.8    |



| Subject | Gene   | Variant                                           | Mutation type | VAF [%] |
|---------|--------|---------------------------------------------------|---------------|---------|
| AML_13  | SF3B1  | NM_012433:exon15:c.2098A>G;p.K700E                | Missense      | 32.0    |
| AML_14  | ASXL1  | NM_015338:exon12:c.1888_1910del:p.630_637del      | InDel         | 43.7    |
| AML_14  | BCOR   | NM_001123385:exon7:c.3490C>T;p.R1164X             | Nonsense      | 94.2    |
| AML_14  | DNMT3A | NM_175629:exon18:c.2163G>C;p.K721N                | Missense      | 89.3    |
| AML_14  | ETV6   | NM_001987:exon3:c.164-2A>G,p.?                    | Splice site   | 44.5    |
| AML_14  | NRAS   | NM_002524:exon2:c.35G>A;p.G12D                    | Missense      | 53.1    |
| AML_14  | PTPN11 | NM_002834:exon3:c.181G>T;p.D61Y                   | Missense      | 12.9    |
| AML_14  | RUNX1  | NM_001754:exon7:c.664delT;p.S222fs                | InDel         | 39.5    |
| AML_15  | KIT    | NM_000222:exon17:c.2447A>T;p.D816V                | Missense      | 38.3    |
| AML_15  | NRAS   | NM_002524:exon3:c.183A>C;p.Q61H                   | Missense      | 5.7     |
| AML_15  | NRAS   | NM_002524:exon3:c.182A>G;p.Q61R                   | Missense      | 21.0    |
| AML_15  | PTPN11 | NM_002834:exon3:c.226G>A;p.E76K                   | Missense      | 14.7    |
| AML_15  | SF3B1  | NM_012433:exon15:c.2098A>G;p.K700E                | Missense      | 44.7    |
| AML_16  | CEBPA  | NM_004364:exon1:c.175G>T;p.E59X                   | Nonsense      | 76.7    |
| AML_16  | CSF3R  | NM_156039:exon15:c.1919C>A;p.T640N                | Missense      | 18.4    |
| AML_16  | RUNX1  | NM_001754:exon9:c.1354G>A;p.V452M                 | Missense      | 57.5    |
| AML_16  | SRSF2  | NM_003016:exon1:c.284C>A;p.P95H                   | Missense      | 41.6    |
| AML_16  | STAG2  | NM_001042750:exon11:c.1015delA;p.K339fs           | InDel         | 28.5    |
| AML_16  | TET2   | NM_001127208:exon3:c.3315_3316del:p.I1105fs       | InDel         | 44.1    |
| AML_16  | TET2   | NM_001127208:exon6:c.3796A>G;p.N1266D             | Missense      | 49.1    |
| AML_16  | WT1    | NM_024426:exon7:c.1099-1G>A,p.?                   | Splice site   | 12.5    |
| AML_17  | ASXL1  | NM_015338:exon12:c.2058_2059del:p.K686fs          | InDel         | 45.3    |
| AML_17  | BCOR   | NM_001123385:exon11:c.4540C>T;p.R1514X            | Nonsense      | 38.9    |
| AML_17  | NRAS   | NM_002524:exon2:c.35G>A;p.G12D                    | Missense      | 48.0    |
| AML_17  | RUNX1  | NM_001754:exon4:c.245_246insAGCA;p.L82fs          | InDel         | 56.0    |
| AML_17  | SRSF2  | NM_003016:exon1:c.284C>A;p.P95H                   | Missense      | 44.4    |
| AML_17  | STAG2  | NM_001042750:exon9:c.775C>T;p.R259X               | Nonsense      | 45.1    |
| AML_17  | TET2   | NM_001127208:exon5:c.3589A>G;p.K1197E             | Missense      | 47.6    |
| AML_18  | ASXL1  | NM_015338:exon12:c.1888_1910del:p.630_637del      | InDel         | 25.8    |
| AML_18  | IDH2   | NM_002168:exon4:c.515G>A;p.R172K                  | Missense      | 21.7    |
| AML_18  | PTPN11 | NM_002834:exon13:c.1517A>C;p.Q506P                | Missense      | 14.4    |
| AML_18  | RUNX1  | NM_001754:exon6:c.610C>T;p.R204X                  | Nonsense      | 36.9    |
| AML_18  | RUNX1  | NM_001754:exon6:c.592G>A;p.D198N                  | Missense      | 4.1     |
| AML_18  | SRSF2  | NM_003016:exon1:c.284C>A;p.P95H                   | Missense      | 37.4    |
| AML_18  | TET2   | NM_001127208:exon11:c.4834_4835del:p.1612_1612del | InDel         | 40.8    |
| AML_19  | ASXL1  | NM_015338:exon12:c.2084delA;p.Q695fs              | InDel         | 2.0     |
| AML_19  | SRSF2  | NM_003016:exon1:c.284C>A;p.P95H                   | Missense      | 44.9    |
| AML_19  | TET2   | NM_001127208:exon3:c.2218C>T;p.Q740X              | Nonsense      | 48.3    |
| AML_19  | TET2   | NM_001127208:exon7:c.3863G>A;p.G1288D             | Missense      | 44.5    |
| AML_20  | IDH2   | NM_002168:exon4:c.419G>A;p.R140Q                  | Missense      | 44.0    |
| AML_21  | DNMT3A | NM_175629:exon23:c.2645G>A;p.R882H                | Missense      | 48.6    |
| AML_22  | DNMT3A | NM_175629:exon23:c.2644C>T;p.R882C                | Missense      | 45.8    |
| AML_22  | FLT3   | NM_004119:exon20:c.2503G>T;p.D835Y                | Missense      | 7.6     |
| AML_22  | RUNX1  | NM_001754:exon9:c.978_979insG;p.L327fs            | InDel         | 46.1    |
| AML_22  | SF3B1  | NM_012433:exon15:c.2098A>G;p.K700E                | Missense      | 49.8    |

| Subject | Gene   | Variant                                                                                     | Mutation type | VAF [%] |
|---------|--------|---------------------------------------------------------------------------------------------|---------------|---------|
| AML_23  | GATA2  | NM_001145661:exon7:c.1160_1171del:p.387_391del                                              | InDel         | 33.7    |
| AML_23  | NRAS   | NM_002524:exon3:c.181C>A:p.Q61K                                                             | Missense      | 39.8    |
| AML_24  | NPM1   | NM_002520:exon11:c.861_862insTGCA:p.L287fs                                                  | InDel         | 27.5    |
| AML_24  | PTPN11 | NM_002834:exon3:c.179G>T:p.G60V                                                             | Missense      | 2.3     |
| AML_24  | RAD21  | NM_006265:exon6:c.640C>T:p.Q214X                                                            | Nonsense      | 2.6     |
| AML_25  | ASXL2  | NM_018263:exon11:c.1771_1772insCCCCACTGAGAATC:p.R591fs                                      | InDel         | 47.2    |
| AML_25  | FLT3   | NM_004119:exon15:c.1837+2->CGTGTTTCAGAGAATATGAATATGATCTCAAATGGGAGTTTCCAAGAGAAAATTTAGAGTTTGG | Splice site   | 13.7    |
| AML_25  | FLT3   | NM_004119:exon14:c.1790_1791insCTCACCTAACGATTTCA GAGAATA:p.Y597delinsYSPNDFREY              | InDel         | 20.1    |
| AML_25  | RUNX1  | NM_001754:exon8:c.861C>G:p.Y287X                                                            | Nonsense      | 45.0    |
| AML_25  | SF3B1  | NM_012433:exon14:c.1996A>C:p.K666Q                                                          | Missense      | 38.4    |
| AML_25  | WT1    | NM_024426:exon7:c.1137_1138insGAGGCGGGTC:p.R380fs                                           | InDel         | 7.8     |
| AML_26  | DNMT3A | NM_175629:exon23:c.2645G>C:p.R882P                                                          | Missense      | 33.3    |
| AML_26  | FLT3   | NM_004119:exon13:c.1613_1805GAGAATATGAATATGATCTCAAATGGGAGTT                                 | InDel         | 15.7    |
| AML_26  | FLT3   | NM_004119:exon14:c.1802_1803insTGATTTTCAGAGAATATG AATATGATCT:p.L601delinsLDFREYDYDL         | InDel         | 4.1     |
| AML_26  | FLT3   | NM_004119:exon14:c.1800_1801insTTCAGAGAATATGAATA TGAT:p.L601delinsFREYDYDL                  | InDel         | 23.9    |
| AML_26  | NPM1   | NM_002520:exon11:c.859_860insTCTG:p.L287fs                                                  | InDel         | 38.4    |
| AML_27  | KRAS   | NM_033360:exon2:c.38G>A:p.G13D                                                              | Missense      | 20.7    |
| AML_27  | NPM1   | NM_002520:exon11:c.861_862insTGCA:p.L287fs                                                  | InDel         | 46.2    |
| AML_28  | MPL    | NM_005373:exon10:c.1544G>T:p.W515L                                                          | Missense      | 2.2     |
| AML_28  | U2AF1  | NM_001025203:exon6:c.470A>C:p.Q157P                                                         | Missense      | 20.4    |
| AML_29  | DDX41  | NM_016222:exon15:c.1574G>A:p.R525H                                                          | Missense      | 7.8     |
| AML_29  | TET2   | NM_001127208:exon7:c.3894T>A:p.C1298X                                                       | Nonsense      | 16.1    |
| AML_30  | ETV6   | NM_001987:exon5:c.976_977insTTGGACCT:p.E326fs                                               | InDel         | 0.6     |
| AML_30  | WT1    | NM_024426:exon7:c.1138_1139insA:p.R380fs                                                    | InDel         | 22.5    |
| AML_31  | BCOR   | NM_001123385:exon4:c.1005dupC:p.S336fs                                                      | InDel         | 44.3    |
| AML_31  | BCORL1 | NM_021946:c.3001C>T:p.Q1001X                                                                | Nonsense      | 46.3    |
| AML_31  | KRAS   | NM_033360:exon2:c.35G>A:p.G12D                                                              | Missense      | 42.4    |
| AML_31  | RUNX1  | NM_001754:exon5:c.484A>G:p.R162G                                                            | Missense      | 27.9    |
| AML_32  | CEBPA  | NM_004364:exon1:c.1000G>A:p.E334K                                                           | Missense      | 43.1    |
| AML_32  | DNMT3A | NM_175629:exon23:c.2645G>A:p.R882H                                                          | Missense      | 35.8    |
| AML_32  | KRAS   | NM_033360:exon3:c.183A>T:p.Q61H                                                             | Missense      | 31.5    |
| AML_32  | NPM1   | NM_002520:exon11:c.859_860insTCTG:p.L287fs                                                  | InDel         | 40.2    |
| AML_32  | PTPN11 | NM_002834:exon3:c.182A>G:p.D61G                                                             | Missense      | 4.5     |
| AML_32  | RAD21  | NM_006265:exon2:c.59C>T:p.A20V                                                              | Missense      | 3.7     |
| AML_33  | BCOR   | NM_001123385:exon11:c.4428+1G>A,p.?                                                         | Splice site   | 86.6    |
| AML_33  | KRAS   | NM_033360:exon2:c.37G>C:p.G13R                                                              | Missense      | 28.4    |
| AML_33  | NRAS   | NM_002524:exon2:c.34G>A:p.G12S                                                              | Missense      | 12.4    |
| AML_33  | RUNX1  | NM_001754:exon5:c.455dupA:p.K152fs                                                          | InDel         | 43.5    |
| AML_33  | STAG2  | NM_001042750:exon20:c.1907_1908insTCCTC:p.Y636fs                                            | InDel         | 85.4    |
| AML_33  | TET2   | NM_001127208:exon11:c.5587G>A:p.A1863T                                                      | Missense      | 46.7    |
| AML_34  | DNMT3A | NM_175629:exon23:c.2644C>T:p.R882C                                                          | Missense      | 42.9    |

| Subject | Gene   | Variant                                                                                                                      | Mutation type | VAF [%] |
|---------|--------|------------------------------------------------------------------------------------------------------------------------------|---------------|---------|
| AML_34  | DNMT3A | NM_175629:exon18:c.2173G>A:p.E725K                                                                                           | Missense      | 42.4    |
| AML_34  | JAK2   | NM_004972:exon14:c.1849G>T:p.V617F                                                                                           | Missense      | 14.9    |
| AML_34  | SRSF2  | NM_003016:exon1:c.284C>A:p.P95H                                                                                              | Missense      | 38.1    |
| AML_34  | TET2   | NM_001127208:exon7:c.3894dupT:p.C1298fs                                                                                      | InDel         | 81.9    |
| AML_35  | NPM1   | NM_002520:exon11:c.859_860insTCTG:p.L287fs                                                                                   | InDel         | 36.8    |
| AML_35  | STAG2  | NM_001042750:p.?                                                                                                             | Splice site   | 70.8    |
| AML_36  | TP53   | NM_000546:exon7:c.742C>T:p.R248W                                                                                             | Missense      | 96.3    |
| AML_37  | BCOR   | NM_001123385:exon4:c.2962_2963insGT:p.S988fs                                                                                 | InDel         | 67.9    |
| AML_37  | IDH2   | NM_002168:exon4:c.419G>A:p.R140Q                                                                                             | Missense      | 46.0    |
| AML_37  | SRSF2  | NM_003016:exon1:c.284_307del:p.95_103del                                                                                     | InDel         | 41.2    |
| AML_38  | BCOR   | NM_001123385:exon10:c.4425T>A:p.Y1475X                                                                                       | Nonsense      | 42.9    |
| AML_38  | DNMT3A | NM_175629:exon22:c.2510C>A:p.S837X                                                                                           | Nonsense      | 50.2    |
| AML_38  | DNMT3A | NM_175629:exon13:c.1490G>C:p.C497S                                                                                           | Missense      | 36.9    |
| AML_38  | NPM1   | NM_002520:exon11:c.859_860insTCTG:p.L287fs                                                                                   | InDel         | 37.6    |
| AML_38  | SF3B1  | NM_012433:exon15:c.2098A>G:p.K700E                                                                                           | Missense      | 42.8    |
| AML_38  | TET2   | NM_001127208:exon3:c.2101C>T:p.Q701X                                                                                         | Nonsense      | 50.7    |
| AML_38  | TET2   | NM_001127208:exon3:c.3249_3250A                                                                                              | InDel         | 2.7     |
| AML_38  | TET2   | NM_001127208:exon10:c.4468G>T:p.E1490X                                                                                       | Nonsense      | 42.2    |
| AML_39  | NRAS   | NM_002524:exon3:c.181C>A:p.Q61K                                                                                              | Missense      | 43.0    |
| AML_39  | SF3B1  | NM_012433:exon15:c.2098A>G:p.K700E                                                                                           | Missense      | 49.5    |
| AML_39  | WT1    | NM_024426:exon7:c.1144_1145insTCGG:p.A382fs                                                                                  | InDel         | 42.6    |
| AML_40  | FLT3   | NM_004119:exon14:c.1809_1810insAGAGAATATGAATATGATCTCAAATGG:p.E604delinsREYEYDLKWE                                            | InDel         | 8.9     |
| AML_40  | FLT3   | NM_004119:exon14:c.1787_1788insCTTCTACGTTGATTTCA GAGA:p.E596delinsDFYVDFRE                                                   | InDel         | 14.4    |
| AML_40  | FLT3   | NM_004119:exon14:c.1787_1788insGATGGTACAGGTGACC GGCTCCTCAGATAATGAGTACTTCTACGTTGATTTTCAGAG A:p.E596delinsEMVQVTGSSDNEYFYVDFRE | InDel         | 24.4    |
| AML_41  | SF3B1  | NM_012433:exon15:c.2098A>G:p.K700E                                                                                           | Missense      | 44.6    |
| AML_41  | TP53   | NM_000546:exon4:c.325T>G:p.F109V                                                                                             | Missense      | 82.5    |
| AML_41  | WT1    | NM_024426:exon1:c.332dupC:p.P111fs                                                                                           | InDel         | 46.0    |
| AML_42  | BCOR   | NM_001123385:exon4:c.1882G>A:p.A628T                                                                                         | Missense      | 2.3     |
| AML_42  | BCOR   | NM_001123385:exon4:c.1240G>A:p.A414T                                                                                         | Missense      | 3.2     |
| AML_42  | FLT3   | NM_004119:exon15:c.1837+3->GATTTTCAGAGAATATGAATATGATCTCAAATGGGAGTTTC CAAGAGAAAATTTAGAGTTTGGT                                 | Splice site   | 37.3    |
| AML_42  | STAG2  | NM_001042750:exon32:c.3468-3A>G,p.?                                                                                          | Splice site   | 2.1     |
| AML_42  | TP53   | NM_000546:exon10:c.1004G>A:p.R335H                                                                                           | Missense      | 2.4     |
| AML_42  | WT1    | NM_024426:exon7:c.1144_1145insTCGG:p.A382fs                                                                                  | InDel         | 43.5    |
| AML_43  | PTPN11 | NM_002834:exon3:c.227A>G:p.E76G                                                                                              | Missense      | 21.7    |
| AML_43  | RUNX1  | NM_001754:exon5:c.496C>T:p.R166X                                                                                             | Nonsense      | 37.1    |
| AML_44  | CSF3R  | NM_156039:exon14:c.1853C>T:p.T618I                                                                                           | Missense      | 41.8    |
| AML_44  | GATA2  | NM_001145661:exon7:c.1187G>T:p.R396L                                                                                         | Missense      | 39.4    |
| AML_44  | NRAS   | NM_002524:exon3:c.182A>G:p.Q61R                                                                                              | Missense      | 16.2    |
| AML_44  | SETBP1 | NM_015559:exon4:c.2608G>A:p.G870S                                                                                            | Missense      | 46.5    |
| AML_44  | U2AF1  | NM_001025203:exon6:c.470A>C:p.Q157P                                                                                          | Missense      | 46.7    |

| Subject | Gene   | Variant                                                                                                                                                    | Mutation type | VAF [%] |
|---------|--------|------------------------------------------------------------------------------------------------------------------------------------------------------------|---------------|---------|
| AML_44  | WT1    | NM_024426:exon2:c.749dupT:p.M250fs                                                                                                                         | InDel         | 78.7    |
| AML_45  | ASXL1  | NM_015338:exon12:c.1926dupA:p.G642fs                                                                                                                       | InDel         | 31.1    |
| AML_45  | ETV6   | NM_001987:exon4:c.329-2A>G,p.?                                                                                                                             | Splice site   | 49.0    |
| AML_45  | RUNX1  | NM_001754:exon7:c.676_677del:p.S226fs                                                                                                                      | InDel         | 46.7    |
| AML_45  | SRSF2  | NM_003016:exon1:c.284C>G:p.P95R                                                                                                                            | Missense      | 49.0    |
| AML_45  | TET2   | NM_001127208:exon3:c.2490dupA:p.I830fs                                                                                                                     | InDel         | 37.9    |
| AML_46  | ASXL1  | NM_015338:exon12:c.1888_1910del:p.H630fs                                                                                                                   | InDel         | 36.1    |
| AML_46  | FLT3   | NM_004119:exon14:c.1769_1770insGCCTCAGATAACCGGC<br>TCCTCAGATAATGAGTACTT:p.F590delinsLPQITGSSDNEYF                                                          | InDel         | 69.4    |
| AML_46  | GATA2  | NM_001145661:exon4:c.416_417del:p.S139fs                                                                                                                   | InDel         | 41.2    |
| AML_46  | PTPN11 | NM_002834:exon3:c.215C>A:p.A72D                                                                                                                            | Missense      | 4.8     |
| AML_46  | RUNX1  | NM_001754:exon7:c.623dupA:p.Q208fs                                                                                                                         | InDel         | 34.6    |
| AML_46  | SRSF2  | NM_003016:exon1:c.284C>A:p.P95H                                                                                                                            | Missense      | 41.0    |
| AML_46  | STAG2  | NM_001042750:exon13:c.1117-1->GATA,p.?                                                                                                                     | Splice site   | 12.5    |
| AML_46  | STAG2  | NM_001042750:exon28:c.2857C>T:p.R953X                                                                                                                      | Nonsense      | 8.7     |
| AML_46  | STAG2  | NM_001042750:exon28:c.2915dupT:p.M972fs                                                                                                                    | InDel         | 69.6    |
| AML_47  | DDX41  | NM_016222:exon2:c.121C>T:p.Q41X                                                                                                                            | Nonsense      | 48.8    |
| AML_48  | BCOR   | NM_001123385:exon12:c.4647_4649del:p.1549_1550del                                                                                                          | InDel         | 17.9    |
| AML_48  | IDH1   | NM_005896:exon4:c.394C>T:p.R132C                                                                                                                           | Missense      | 8.3     |
| AML_48  | RUNX1  | NM_001754:p.?                                                                                                                                              | Splice site   | 13.2    |
| AML_48  | SRSF2  | NM_003016:exon1:c.284C>A:p.P95H                                                                                                                            | Missense      | 13.0    |
| AML_48  | STAG2  | NM_001042750:exon10:c.868dupA:p.F289fs                                                                                                                     | InDel         | 7.5     |
| AML_48  | WT1    | NM_024426:exon10:c.1462A>G:p.S488G                                                                                                                         | Missense      | 52.7    |
| AML_49  | DNMT3A | NM_175629:exon8:c.958C>T:p.R320X                                                                                                                           | Nonsense      | 32.9    |
| AML_49  | IDH1   | NM_005896:exon4:c.394C>A:p.R132S                                                                                                                           | Missense      | 48.4    |
| AML_49  | NPM1   | NM_002520:exon11:c.861_862insTGCA:p.L287fs                                                                                                                 | InDel         | 50.2    |
| AML_50  | DNMT3A | NM_175629:exon17:c.1936+3G>A,p.?                                                                                                                           | Splice site   | 66.2    |
| AML_50  | TET2   | NM_001127208:exon11:c.5633G>A:p.R1878H                                                                                                                     | Missense      | 40.1    |
| AML_50  | TP53   | NM_000546:exon6:c.596_598del:p.199_200del                                                                                                                  | InDel         | 4.3     |
| AML_50  | TP53   | NM_000546:exon5:c.470T>A:p.V157D                                                                                                                           | Missense      | 83.3    |
| AML_51  | BCOR   | NM_001123385:exon10:c.4288C>T:p.Q1430X                                                                                                                     | Nonsense      | 45.9    |
| AML_51  | BCORL1 | NM_021946:c.3268C>T:p.R1090X                                                                                                                               | Nonsense      | 28.3    |
| AML_51  | BCORL1 | NM_021946:c.3994C>T:p.R1332X                                                                                                                               | Nonsense      | 10.3    |
| AML_51  | DNMT3A | NM_175629:exon23:c.2645G>A:p.R882H                                                                                                                         | Missense      | 50.2    |
| AML_51  | NRAS   | NM_002524:exon4:c.436G>A:p.A146T                                                                                                                           | Missense      | 3.4     |
| AML_51  | RUNX1  | NM_001754:exon4:c.325A>T:p.N109Y                                                                                                                           | Missense      | 48.0    |
| AML_51  | STAG2  | NM_001042750:exon28:c.2857C>T:p.R953X                                                                                                                      | Nonsense      | 48.3    |
| AML_52  | TET2   | NM_001127208:exon3:c.1294G>T:p.E432X                                                                                                                       | Nonsense      | 53.0    |
| AML_52  | TET2   | NM_001127208:exon8:c.3987delG:p.L1329fs                                                                                                                    | InDel         | 52.1    |
| AML_53  | FLT3   | NM_004119:exon14:c.1787_1788insTCCCCACCAGCTACAG<br>ATGGTACAGGTGACCGGCTCCTCAGATAATGAGTACTTCT<br>ACGTTGATTTTCAGAGA:p.E596delinsDPHQLQMVQVTGSSD<br>NEYFYVDFRE | InDel         | 23.8    |
| AML_54  | CBL    | NM_005188:exon8:c.1199T>G:p.M400R                                                                                                                          | Missense      | 79.0    |
| AML_54  | IDH1   | NM_005896:exon4:c.395G>A:p.R132H                                                                                                                           | Missense      | 42.3    |
| AML_54  | RUNX1  | NM_001754:exon6:c.611G>A:p.R204Q                                                                                                                           | Missense      | 8.7     |

| Subject | Gene          | Variant                                                           | Mutation type | VAF [%] |
|---------|---------------|-------------------------------------------------------------------|---------------|---------|
| AML_54  | <i>RUNX1</i>  | NM_001754:exon5:c.370_371insGATG:p.V124fs                         | InDel         | 35.0    |
| AML_54  | <i>SRSF2</i>  | NM_003016:exon1:c.284C>G:p.P95R                                   | Missense      | 46.2    |
| AML_55  | <i>DNMT3A</i> | NM_175629:exon21:c.2409_2410insTAGG:p.P804_L805delinsX            | Nonsense      | 53.9    |
| AML_55  | <i>RUNX1</i>  | NM_001754:exon6:c.602G>A:p.R201Q                                  | Missense      | 13.6    |
| AML_55  | <i>RUNX1</i>  | NM_001754:exon5:c.496C>G:p.R166G                                  | Missense      | 15.5    |
| AML_55  | <i>SF3B1</i>  | NM_012433:exon15:c.2098A>G:p.K700E                                | Missense      | 28.3    |
| AML_56  | <i>ASXL1</i>  | NM_015338:exon12:c.2925T>A:p.C975X                                | Nonsense      | 5.4     |
| AML_56  | <i>TP53</i>   | NM_000546:exon6:c.659_672del:p.Y220fs                             | InDel         | 34.2    |
| AML_57  | <i>ASXL1</i>  | NM_015338:exon12:c.1927dupG:p.G642fs                              | InDel         | 23.0    |
| AML_57  | <i>BCOR</i>   | NM_001123385:exon4:c.466_467insCCCCC AAAACACCGCCTGGAATAC:p.Q156fs | InDel         | 59.0    |
| AML_57  | <i>BCOR</i>   | NM_001123385:exon4:c.464_465insCCCCC AAAACACCGCCTGGAAT:p.I155fs   | InDel         | 5.7     |
| AML_57  | <i>RUNX1</i>  | NM_001754:exon6:c.610C>T:p.R204X                                  | Nonsense      | 20.5    |
| AML_57  | <i>SRSF2</i>  | NM_003016:exon1:c.284C>A:p.P95H                                   | Missense      | 42.5    |
| AML_57  | <i>STAG2</i>  | NM_001042750:exon17:c.1535_1536AGC                                | InDel         | 15.4    |
| AML_57  | <i>STAG2</i>  | NM_001042750:exon17:c.1536delA:p.A512fs                           | InDel         | 75.6    |
| AML_58  | <i>ASXL1</i>  | NM_015338:exon12:c.2243delA:p.Q748fs                              | InDel         | 40.8    |
| AML_58  | <i>U2AF1</i>  | NM_001025203:exon2:c.101C>T:p.S34F                                | Missense      | 47.3    |
| AML_59  | <i>ASXL1</i>  | NM_015338:exon12:c.1888_1910del:p.H630fs                          | InDel         | 42.4    |
| AML_59  | <i>CBL</i>    | NM_005188:exon8:c.1186T>C:p.C396R                                 | Missense      | 29.0    |
| AML_59  | <i>CBL</i>    | NM_005188:exon9:c.1250C>G:p.P417R                                 | Missense      | 4.5     |
| AML_59  | <i>FLT3</i>   | NM_004119:exon20:c.2503G>T:p.D835Y                                | Missense      | 32.0    |
| AML_59  | <i>SRSF2</i>  | NM_003016:exon1:c.284C>A:p.P95H                                   | Missense      | 48.5    |
| AML_59  | <i>TET2</i>   | NM_001127208:exon3:c.1143delC:p.F381fs                            | InDel         | 46.2    |
| AML_59  | <i>TET2</i>   | NM_001127208:exon3:c.1172delC:p.S391fs                            | InDel         | 45.7    |
| AML_60  | <i>BCORL1</i> | NM_021946:c.3304A>T:p.K1102X                                      | Nonsense      | 89.1    |
| AML_60  | <i>ETV6</i>   | NM_001987:exon3:c.305_306insGAAGGGGGACCTC:p.F102fs                | InDel         | 23.1    |
| AML_60  | <i>FLT3</i>   | NM_004119:exon14:c.1781_1782insGGT:p.F594delinsLV                 | InDel         | 26.7    |
| AML_60  | <i>NRAS</i>   | NM_002524:exon3:c.183A>T:p.Q61H                                   | Missense      | 2.5     |
| AML_60  | <i>NRAS</i>   | NM_002524:exon2:c.37G>C:p.G13R                                    | Missense      | 9.7     |
| AML_61  | <i>ASXL1</i>  | NM_015338:exon12:c.2160delC:p.D720fs                              | InDel         | 48.4    |
| AML_61  | <i>IDH2</i>   | NM_002168:exon4:c.418C>G:p.R140G                                  | Missense      | 43.3    |
| AML_61  | <i>KRAS</i>   | NM_033360:exon2:c.34G>C:p.G12R                                    | Missense      | 3.3     |
| AML_61  | <i>NRAS</i>   | NM_002524:exon2:c.35G>T:p.G12V                                    | Missense      | 36.7    |
| AML_61  | <i>RUNX1</i>  | NM_001754:exon7:c.694C>T:p.R232W                                  | Missense      | 29.3    |
| AML_61  | <i>SRSF2</i>  | NM_003016:exon1:c.284C>A:p.P95H                                   | Missense      | 50.4    |
| AML_61  | <i>STAG2</i>  | NM_001042750:exon20:c.1840C>T:p.R614X                             | Nonsense      | 94.7    |
| AML_62  | <i>FLT3</i>   | NM_004119:exon20:c.2508_2510del:p.836_837del                      | InDel         | 2.2     |
| AML_62  | <i>IDH1</i>   | NM_005896:exon4:c.395G>A:p.R132H                                  | Missense      | 38.4    |
| AML_63  | <i>TP53</i>   | NM_000546:exon8:c.818G>A:p.R273H                                  | Missense      | 25.6    |
| AML_63  | <i>TP53</i>   | NM_000546:exon6:c.657delC:p.P219fs                                | InDel         | 23.7    |
| AML_64  | <i>DNMT3A</i> | NM_175629:exon23:c.2645G>A:p.R882H                                | Missense      | 49.0    |
| AML_64  | <i>JAK2</i>   | NM_004972:exon14:c.1849G>T:p.V617F                                | Missense      | 48.0    |
| AML_64  | <i>NRAS</i>   | NM_002524:exon2:c.38G>T:p.G13V                                    | Missense      | 48.0    |

| Subject | Gene   | Variant                                                                                                                                                                    | Mutation type | VAF [%] |
|---------|--------|----------------------------------------------------------------------------------------------------------------------------------------------------------------------------|---------------|---------|
| AML_64  | STAG2  | NM_001042750:exon6:c.328C>T:p.R110X                                                                                                                                        | Nonsense      | 48.0    |
| AML_64  | TET2   | NM_001127208:exon3:c.547dupA:p.L182fs                                                                                                                                      | InDel         | 50.0    |
| AML_65  | ASXL1  | NM_015338:exon12:c.4116_4117del:p.1372_1373del                                                                                                                             | InDel         | 44.7    |
| AML_65  | NRAS   | NM_002524:exon2:c.38G>T:p.G13V                                                                                                                                             | Missense      | 7.7     |
| AML_65  | RUNX1  | NM_001754:exon5:c.492_493insTA:p.G165_R166delinsX                                                                                                                          | Nonsense      | 8.6     |
| AML_65  | SRSF2  | NM_003016:exon1:c.283_284insGCC:p.P95delinsRP                                                                                                                              | InDel         | 47.0    |
| AML_65  | STAG2  | NM_001042750:exon21:c.2096+1->T,p.?                                                                                                                                        | Splice site   | 71.7    |
| AML_65  | TET2   | NM_001127208:exon3:c.1452T>A:p.C484X                                                                                                                                       | Nonsense      | 28.6    |
| AML_65  | TET2   | NM_001127208:exon4:c.3430G>A:p.E1144K                                                                                                                                      | Missense      | 48.9    |
| AML_66  | ASXL1  | NM_015338:exon12:c.1888_1910del:p.H630fs                                                                                                                                   | InDel         | 40.4    |
| AML_66  | IDH1   | NM_005896:exon4:c.394C>G:p.R132G                                                                                                                                           | Missense      | 45.2    |
| AML_66  | JAK2   | NM_004972:exon14:c.1849G>T:p.V617F                                                                                                                                         | Missense      | 3.4     |
| AML_66  | RUNX1  | NM_001754:exon4:c.319C>T:p.R107C                                                                                                                                           | Missense      | 44.3    |
| AML_66  | SRSF2  | NM_003016:exon1:c.284C>A:p.P95H                                                                                                                                            | Missense      | 50.8    |
| AML_67  | TP53   | NM_000546:exon7:c.743G>A:p.R248Q                                                                                                                                           | Missense      | 50.4    |
| AML_68  | FLT3   | NM_004119:exon14:c.1834_1835insATGAATATGATCTCAAA<br>TGGGAGTTTCCAAGAGAAAATTTAGAGT;p.F612delinsYEY<br>DLKWEFPRENLEF                                                          | InDel         | 12.0    |
| AML_68  | FLT3   | NM_004119:exon14:c.1797_1798insCTTAACGTTGATTTTCAG<br>AGAATATGAATAT;p.D600delinsLNVDFREYEYD                                                                                 | InDel         | 4.9     |
| AML_68  | FLT3   | NM_004119:exon14:c.1793_1794insCTACGTTGATTTTCAGA<br>GAATATGA;p.E598delinsDYVDFREYE                                                                                         | InDel         | 3.9     |
| AML_68  | U2AF1  | NM_001025203:exon2:c.101C>T:p.S34F                                                                                                                                         | Missense      | 44.6    |
| AML_69  | FLT3   | NM_004119:exon15:c.1837+2-<br>>AAAGCGGGTGACCGGCTCCTCAGATAATGAGTACTTCTA<br>CGTTGATTTTCAGAGAATATGAATATGATCTCAAATGGGAG<br>TTTCCAAGAGAAAATTTAGAGTTTGG                          | Splice site   | 2.1     |
| AML_69  | FLT3   | NM_004119:exon14:c.1815_1816insGGAAAGCGGGTGACC<br>GGCTCCTCAGATAATGAGTACTTCTACGTTGATTTTCAGAG<br>AATATGAATATGATCTCAAATGGGAGTTT;p.P606delinsGKR<br>VTGSSDNEYFYVDFREYEYDLKWEFP | InDel         | 11.8    |
| AML_69  | FLT3   | NM_004119:exon14:c.1788_1789insGATAATGAGTACTTCTA<br>CGTTGATTTTCAGAGAA;p.Y597delinsDNEYFYVDFREY                                                                             | InDel         | 3.6     |
| AML_69  | IDH2   | NM_002168:exon4:c.419G>A:p.R140Q                                                                                                                                           | Missense      | 41.1    |
| AML_69  | NPM1   | NM_002520:exon11:c.859_860insTCTG;p.L287fs                                                                                                                                 | InDel         | 36.8    |
| AML_69  | SRSF2  | NM_003016:exon1:c.284C>T:p.P95L                                                                                                                                            | Missense      | 29.3    |
| AML_69  | WT1    | NM_024426:exon7:c.1195A>C:p.N399H                                                                                                                                          | Missense      | 47.4    |
| AML_70  | BCOR   | NM_001123385:exon4:c.524_527del:p.175_176del                                                                                                                               | InDel         | 65.3    |
| AML_70  | NRAS   | NM_002524:exon3:c.180_181insGCTTCC:p.Q61delinsASQ                                                                                                                          | InDel         | 15.3    |
| AML_70  | RUNX1  | NM_001754:exon5:c.495_496insTT:p.R166fs                                                                                                                                    | InDel         | 43.3    |
| AML_70  | U2AF1  | NM_001025203:exon2:c.101C>A:p.S34Y                                                                                                                                         | Missense      | 41.0    |
| AML_71  | IDH2   | NM_002168:exon4:c.515G>A:p.R172K                                                                                                                                           | Missense      | 35.0    |
| AML_72  | BCOR   | NM_001123385:exon11:c.4428+1G>A,p.?                                                                                                                                        | Splice site   | 36.2    |
| AML_72  | DNMT3A | NM_175629:exon23:c.2728G>C:p.A910P                                                                                                                                         | Missense      | 38.2    |
| AML_72  | DNMT3A | NM_175629:exon8:c.942G>A:p.W314X                                                                                                                                           | Nonsense      | 45.8    |
| AML_72  | IDH2   | NM_002168:exon4:c.419G>A:p.R140Q                                                                                                                                           | Missense      | 40.2    |
| AML_73  | FLT3   | NM_004119:exon20:c.2503G>T:p.D835Y                                                                                                                                         | Missense      | 3.8     |
| AML_73  | NPM1   | NM_002520:exon11:c.859_860insTCTG;p.L287fs                                                                                                                                 | InDel         | 37.0    |
| AML_73  | NRAS   | NM_002524:exon2:c.38G>A:p.G13D                                                                                                                                             | Missense      | 14.4    |

| Subject | Gene          | Variant                                                                                                                     | Mutation type | VAF [%] |
|---------|---------------|-----------------------------------------------------------------------------------------------------------------------------|---------------|---------|
| AML_73  | <i>PTPN11</i> | NM_002834:exon3:c.179G>T:p.G60V                                                                                             | Missense      | 3.3     |
| AML_73  | <i>RAD21</i>  | NM_006265:exon8:c.933_934insTA:p.T312_V313delinsX                                                                           | Nonsense      | 33.0    |
| AML_74  | <i>FLT3</i>   | NM_004119:exon15:c.1837+1->ATTTTCAGAGAATATGAATATGATCTCAAATGGGAGTTTCC AAGAGAAAATTTAGAGTTTG                                   | Splice site   | 7.5     |
| AML_74  | <i>FLT3</i>   | NM_004119:exon14:c.1778_1779insCCAGCTACAGATGGTA CAGGTGACCGGCTCCTCAGATAATGAGTACTTCTACGTTG A:p.D593delinsDQLQMVQVTGSSDNEYFYVD | InDel         | 33.2    |
| AML_74  | <i>IDH2</i>   | NM_002168:exon4:c.419G>A:p.R140Q                                                                                            | Missense      | 41.5    |
| AML_75  | <i>ASXL1</i>  | NM_015338:exon12:c.1773C>A:p.Y591X                                                                                          | Nonsense      | 23.6    |
| AML_75  | <i>EZH2</i>   | NM_004456:exon11:c.1262_1271del:p.T421fs                                                                                    | InDel         | 52.3    |
| AML_75  | <i>IDH1</i>   | NM_005896:exon4:c.395G>A:p.R132H                                                                                            | Missense      | 34.5    |
| AML_75  | <i>PTPN11</i> | NM_002834:exon3:c.188A>G:p.Y63C                                                                                             | Missense      | 29.2    |
| AML_75  | <i>RUNX1</i>  | NM_001754:exon9:c.1003_1013del:p.Q335fs                                                                                     | InDel         | 12.7    |
| AML_75  | <i>RUNX1</i>  | NM_001754:exon6:c.508+1G>T,p.?                                                                                              | Splice site   | 15.7    |
| AML_76  | <i>DNMT3A</i> | NM_175629:exon23:c.2645G>A:p.R882H                                                                                          | Missense      | 35.5    |
| AML_76  | <i>KRAS</i>   | NM_033360:exon2:c.35G>A:p.G12D                                                                                              | Missense      | 33.6    |
| AML_76  | <i>NPM1</i>   | NM_002520:exon11:c.859_860insTCTG:p.L287fs                                                                                  | InDel         | 38.3    |
| AML_77  | <i>BCOR</i>   | NM_001123385:exon8:c.3649C>T:p.R1217X                                                                                       | Nonsense      | 16.3    |
| AML_77  | <i>DNMT3A</i> | NM_175629:exon8:c.912delC:p.S304fs                                                                                          | InDel         | 28.3    |
| AML_77  | <i>IDH2</i>   | NM_002168:exon4:c.419G>A:p.R140Q                                                                                            | Missense      | 23.4    |
| AML_78  | <i>BCOR</i>   | NM_001123385:exon10:c.4174_4225del:p.V1392fs                                                                                | InDel         | 4.1     |
| AML_78  | <i>BCORL1</i> | NM_021946:c.2843_2844del:p.Q948fs                                                                                           | InDel         | 86.6    |
| AML_78  | <i>NRAS</i>   | NM_002524:exon2:c.38G>A:p.G13D                                                                                              | Missense      | 42.9    |
| AML_78  | <i>RUNX1</i>  | NM_001754:exon9:c.1290dupG:p.P431fs                                                                                         | InDel         | 43.2    |
| AML_78  | <i>U2AF1</i>  | NM_001025203:exon2:c.101C>T:p.S34F                                                                                          | Missense      | 47.8    |
| AML_79  | <i>DDX41</i>  | NM_016222:exon15:c.1586_1587del:p.T529fs                                                                                    | InDel         | 46.8    |
| AML_79  | <i>DNMT3A</i> | NM_175629:exon13:c.1502A>G:p.N501S                                                                                          | Missense      | 54.1    |
| AML_79  | <i>EZH2</i>   | NM_004456:exon17:c.1973_1974del:p.R658fs                                                                                    | InDel         | 60.5    |
| AML_80  | <i>ASXL1</i>  | NM_015338:exon12:c.2084dupA:p.Q695fs                                                                                        | InDel         | 39.1    |
| AML_80  | <i>RUNX1</i>  | NM_001754:exon4:c.230dupG:p.S77fs                                                                                           | InDel         | 45.6    |
| AML_80  | <i>SRSF2</i>  | NM_003016:exon1:c.284C>A:p.P95H                                                                                             | Missense      | 40.6    |
| AML_80  | <i>STAG2</i>  | NM_001042750:exon27:c.2694_2695insTGGTAGAGTTGA:p.D898delinsDWX                                                              | Nonsense      | 29.4    |
| AML_81  | <i>ASXL1</i>  | NM_015338:exon12:c.1927dupG:p.G642fs                                                                                        | InDel         | 41.4    |
| AML_81  | <i>EZH2</i>   | NM_004456:exon18:c.2050C>T:p.R684C                                                                                          | Missense      | 9.9     |
| AML_81  | <i>NRAS</i>   | NM_002524:exon2:c.38G>A:p.G13D                                                                                              | Missense      | 42.1    |
| AML_81  | <i>RUNX1</i>  | NM_001754:exon6:c.553C>A:p.Q185K                                                                                            | Missense      | 42.3    |
| AML_81  | <i>SRSF2</i>  | NM_003016:exon1:c.284C>A:p.P95H                                                                                             | Missense      | 50.0    |
| AML_81  | <i>STAG2</i>  | NM_001042750:exon30:c.3097C>T:p.R1033X                                                                                      | Nonsense      | 73.5    |
| AML_82  | <i>ASXL1</i>  | NM_015338:exon12:c.1927dupG:p.G642fs                                                                                        | InDel         | 15.4    |
| AML_82  | <i>PHF6</i>   | NM_032458:exon6:c.442G>T:p.E148X                                                                                            | Nonsense      | 32.9    |
| AML_82  | <i>U2AF1</i>  | NM_001025203:exon2:c.101C>T:p.S34F                                                                                          | Missense      | 30.1    |
| AML_83  | <i>EZH2</i>   | NM_004456:exon19:c.2161A>G:p.I721V                                                                                          | Missense      | 54.0    |
| AML_83  | <i>FLT3</i>   | NM_004119:exon20:c.2503G>T:p.D835Y                                                                                          | Missense      | 13.4    |
| AML_83  | <i>FLT3</i>   | NM_004119:exon14:c.1796_1796delinsCCCTAGATAATGAG TACTTCTACGTTGATTTTCAGAGAATATGAAT                                           | InDel         | 0.5     |

| Subject | Gene          | Variant                                                                                                         | Mutation type | VAF [%] |
|---------|---------------|-----------------------------------------------------------------------------------------------------------------|---------------|---------|
| AML_83  | <i>NPM1</i>   | NM_002520:exon11:c.859_860insTCTG;p.L287fs                                                                      | InDel         | 36.3    |
| AML_83  | <i>PTPN11</i> | NM_002834:exon3:c.179G>C;p.G60A                                                                                 | Missense      | 6.8     |
| AML_83  | <i>WT1</i>    | NM_024426:exon7:c.1142C>A;p.S381X                                                                               | Nonsense      | 17.2    |
| AML_83  | <i>WT1</i>    | NM_024426:exon1:c.252_256del;p.84_86del                                                                         | InDel         | 33.3    |
| AML_84  | <i>ASXL1</i>  | NM_015338:exon12:c.1927dupG;p.G642fs                                                                            | InDel         | 27.0    |
| AML_84  | <i>BCOR</i>   | NM_001123385:exon11:c.4455_4456insGG;p.K1486fs                                                                  | InDel         | 80.9    |
| AML_84  | <i>BCOR</i>   | NM_001123385:exon11:c.4455_4455delinsTGG                                                                        | InDel         | 86.9    |
| AML_84  | <i>EZH2</i>   | NM_004456:exon18:c.2051G>A;p.R684H                                                                              | Missense      | 5.2     |
| AML_84  | <i>HNRNPK</i> | NM_002140:exon16:c.1192-2A>G,p.?                                                                                | Splice site   | 40.6    |
| AML_84  | <i>STAG2</i>  | NM_001042750:exon19:c.1810C>T;p.R604X                                                                           | Nonsense      | 88.2    |
| AML_85  | <i>ASXL1</i>  | NM_015338:exon12:c.1927dupG;p.G642fs                                                                            | InDel         | 23.6    |
| AML_85  | <i>GATA1</i>  | NM_002049:exon3:c.325G>C;p.V109L                                                                                | Missense      | 92.5    |
| AML_85  | <i>IDH2</i>   | NM_002168:exon4:c.419G>A;p.R140Q                                                                                | Missense      | 46.2    |
| AML_85  | <i>SRSF2</i>  | NM_003016:exon1:c.284C>A;p.P95H                                                                                 | Missense      | 48.8    |
| AML_85  | <i>STAG2</i>  | NM_001042750:exon20:c.1907dupA;p.Y636_H637delinsX                                                               | Nonsense      | 91.9    |
| AML_86  | <i>DNMT3A</i> | NM_175629:exon20:c.2322+1G>A,p.?                                                                                | Splice site   | 37.7    |
| AML_86  | <i>NPM1</i>   | NM_002520:exon11:c.859_860insTCTG;p.L287fs                                                                      | InDel         | 51.5    |
| AML_86  | <i>NRAS</i>   | NM_002524:exon2:c.34G>A;p.G12S                                                                                  | Missense      | 4.1     |
| AML_86  | <i>PTPN11</i> | NM_002834:exon3:c.179G>T;p.G60V                                                                                 | Missense      | 36.9    |
| AML_86  | <i>TET2</i>   | NM_001127208:exon6:c.3707T>A;p.I1236N                                                                           | Missense      | 2.7     |
| AML_87  | <i>KRAS</i>   | NM_033360:exon2:c.35G>T;p.G12V                                                                                  | Missense      | 5.1     |
| AML_87  | <i>NRAS</i>   | NM_002524:exon2:c.35G>A;p.G12D                                                                                  | Missense      | 6.8     |
| AML_87  | <i>TET2</i>   | NM_001127208:exon11:c.4883_4884insTCCATCATATCAATGCAATGGAAACC;p.Y1628fs                                          | InDel         | 13.9    |
| AML_88  | <i>DNMT3A</i> | NM_175629:exon14:c.1627G>T;p.G543C                                                                              | Missense      | 12.1    |
| AML_88  | <i>FLT3</i>   | NM_004119:exon15:c.1837+10>AGAATAATGAGTACTTCTACGTTGATTTCAGAGAATATGAATATGATCTCAAATGGGAGTTTCCAAGAGAAAATTTAGAGTTTG | InDel         | 1.6     |
| AML_88  | <i>NPM1</i>   | NM_002520:exon11:c.859_860insTCTG;p.L287fs                                                                      | InDel         | 20.4    |
| AML_88  | <i>WT1</i>    | NM_024426:exon7:c.1144_1145insTCGG;p.A382fs                                                                     | InDel         | 6.2     |
| AML_89  | <i>ASXL1</i>  | NM_015338:exon12:c.2077C>T;p.R693X                                                                              | Nonsense      | 8.3     |
| AML_89  | <i>FLT3</i>   | NM_004119:exon14:c.1808_1808delinsTCAGAGAATATGAATATGATCTCAAAT                                                   | InDel         | 0.3     |
| AML_89  | <i>NRAS</i>   | NM_002524:exon3:c.182A>C;p.Q61P                                                                                 | Missense      | 4.1     |
| AML_89  | <i>NRAS</i>   | NM_002524:exon2:c.38G>T;p.G13V                                                                                  | Missense      | 39.1    |
| AML_89  | <i>RUNX1</i>  | NM_001754:exon5:c.374delC;p.P125fs                                                                              | InDel         | 46.0    |
| AML_89  | <i>SRSF2</i>  | NM_003016:exon1:c.284C>A;p.P95H                                                                                 | Missense      | 44.6    |
| AML_89  | <i>STAG2</i>  | NM_001042750:exon9:c.687dupT;p.A229fs                                                                           | InDel         | 94.9    |
| AML_89  | <i>TET2</i>   | NM_001127208:exon11:c.5072_5073insTA;p.S1691fs                                                                  | InDel         | 46.9    |
| AML_90  | <i>ASXL1</i>  | NM_015338:exon12:c.1927dupG;p.G642fs                                                                            | InDel         | 19.5    |
| AML_90  | <i>TET2</i>   | NM_001127208:exon10:c.4210C>T;p.R1404X                                                                          | Nonsense      | 17.1    |
| AML_91  | <i>JAK2</i>   | NM_004972:exon14:c.1849G>T;p.V617F                                                                              | Missense      | 98.6    |
| AML_92  | <i>DNMT3A</i> | NM_175629:exon16:c.1898C>A;p.P633H                                                                              | Missense      | 47.4    |
| AML_92  | <i>IDH2</i>   | NM_002168:exon4:c.419G>A;p.R140Q                                                                                | Missense      | 6.4     |
| AML_92  | <i>NPM1</i>   | NM_002520:exon11:c.859_860insTCTG;p.L287fs                                                                      | InDel         | 43.1    |
| AML_92  | <i>NRAS</i>   | NM_002524:exon2:c.38G>A;p.G13D                                                                                  | Missense      | 4.3     |



| Subject | Gene          | Variant                                                                                                 | Mutation type | VAF [%] |
|---------|---------------|---------------------------------------------------------------------------------------------------------|---------------|---------|
| AML_92  | <i>NRAS</i>   | NM_002524:exon2:c.35G>A:p.G12D                                                                          | Missense      | 37.1    |
| AML_92  | <i>RAD21</i>  | NM_006265:exon13:c.1621-1G>T,p.?                                                                        | Splice site   | 39.9    |
| AML_93  | <i>DNMT3A</i> | NM_175629:exon19:c.2311C>T:p.R771X                                                                      | Nonsense      | 51.0    |
| AML_93  | <i>DNMT3A</i> | NM_175629:exon15:c.1687G>A:p.V563M                                                                      | Missense      | 52.1    |
| AML_93  | <i>IDH2</i>   | NM_002168:exon4:c.419G>A:p.R140Q                                                                        | Missense      | 48.2    |
| AML_93  | <i>JAK2</i>   | NM_004972:exon14:c.1849G>T:p.V617F                                                                      | Missense      | 47.6    |
| AML_93  | <i>SRSF2</i>  | NM_003016:exon1:c.284C>A:p.P95H                                                                         | Missense      | 40.1    |
| AML_94  | <i>ASXL1</i>  | NM_015338:exon12:c.1888_1910del:p.630_637del                                                            | InDel         | 21.5    |
| AML_94  | <i>ASXL1</i>  | NM_015338:exon12:c.2118_2119insAC:p.H706fs                                                              | InDel         | 8.9     |
| AML_94  | <i>DNMT3A</i> | NM_175629:exon19:c.2255_2257del:p.752_753del                                                            | InDel         | 47.5    |
| AML_94  | <i>DNMT3A</i> | NM_175629:exon19:c.2206C>T:p.R736C                                                                      | Missense      | 47.6    |
| AML_94  | <i>IDH2</i>   | NM_002168:exon4:c.515G>A:p.R172K                                                                        | Missense      | 45.4    |
| AML_95  | <i>NRAS</i>   | NM_002524:exon3:c.182A>G:p.Q61R                                                                         | Missense      | 11.2    |
| AML_95  | <i>TP53</i>   | NM_000546:exon8:c.844C>T:p.R282W                                                                        | Missense      | 63.0    |
| AML_95  | <i>TP53</i>   | NM_000546:exon4:c.97-2A>G,p.?                                                                           | Splice site   | 20.0    |
| AML_96  | <i>DNMT3A</i> | NM_175629:exon23:c.2645G>A:p.R882H                                                                      | Missense      | 38.5    |
| AML_96  | <i>NPM1</i>   | NM_002520:exon11:c.859_860insTCTG:p.L287fs                                                              | InDel         | 36.5    |
| AML_96  | <i>NRAS</i>   | NM_002524:exon2:c.35G>A:p.G12D                                                                          | Missense      | 37.9    |
| AML_96  | <i>U2AF1</i>  | NM_001025203:exon2:c.101C>T:p.S34F                                                                      | Missense      | 41.6    |
| AML_97  | <i>DNMT3A</i> | NM_175629:exon23:c.2711C>T:p.P904L                                                                      | Missense      | 18.7    |
| AML_97  | <i>IDH2</i>   | NM_002168:exon4:c.419G>A:p.R140Q                                                                        | Missense      | 19.6    |
| AML_97  | <i>KRAS</i>   | NM_033360:exon2:c.35G>A:p.G12D                                                                          | Missense      | 2.9     |
| AML_98  | <i>NPM1</i>   | NM_002520:exon11:c.859_860insTCTG:p.L287fs                                                              | InDel         | 31.0    |
| AML_98  | <i>TET2</i>   | NM_001127208:exon3:c.1441C>T:p.Q481X                                                                    | Nonsense      | 34.1    |
| AML_98  | <i>TET2</i>   | NM_001127208:exon3:c.2491C>T:p.Q831X                                                                    | Nonsense      | 56.3    |
| AML_99  | <i>DNMT3A</i> | NM_175629:exon16:c.1906G>T:p.V636L                                                                      | Missense      | 96.3    |
| AML_99  | <i>FLT3</i>   | NM_004119:exon14:c.1810_1811insTAGTTGATTCAGAGAA<br>TATGAATATGATCTCAAATGGG;p.E604delinsVDFREYEYD<br>LKWE | InDel         | 29.4    |
| AML_99  | <i>FLT3</i>   | NM_004119:exon14:c.1792_1793insTCGATTCAGAGAATAT<br>G;p.E598delinsVDFREYE                                | InDel         | 12.7    |
| AML_99  | <i>RUNX1</i>  | NM_001754:exon4:c.330_331insT:p.T111fs                                                                  | InDel         | 22.8    |
| AML_100 | <i>ETV6</i>   | NM_001987:exon6:c.1138T>G:p.W380G                                                                       | Missense      | 25.0    |
| AML_100 | <i>KRAS</i>   | NM_033360:exon3:c.183A>C:p.Q61H                                                                         | Missense      | 14.9    |
| AML_100 | <i>WT1</i>    | NM_024426:exon9:c.1395C>A:p.H465Q                                                                       | Missense      | 5.4     |
| AML_100 | <i>WT1</i>    | NM_024426:exon7:c.1199dupA:p.K400fs                                                                     | InDel         | 3.1     |
| AML_101 | <i>ASXL1</i>  | NM_015338:exon12:c.1927dupG:p.G642fs                                                                    | InDel         | 23.2    |
| AML_101 | <i>KDM6A</i>  | NM_021140:exon13:c.1310C>T:p.A437V                                                                      | Missense      | 2.5     |
| AML_101 | <i>RUNX1</i>  | NM_001754:exon9:c.989dupT:p.F330fs                                                                      | InDel         | 39.0    |
| AML_101 | <i>TET2</i>   | NM_001127208:exon7:c.3866G>T:p.C1289F                                                                   | Missense      | 36.4    |
| AML_101 | <i>U2AF1</i>  | NM_001025203:exon6:c.467G>A:p.R156H                                                                     | Missense      | 25.5    |
| AML_102 | <i>BCOR</i>   | NM_001123385:exon13:c.4742-1G>T,p.?                                                                     | Splice site   | 25.0    |
| AML_102 | <i>NRAS</i>   | NM_002524:exon2:c.34G>T:p.G12C                                                                          | Missense      | 13.5    |
| AML_102 | <i>RUNX1</i>  | NM_001754:exon6:c.509-3C>G,p.?                                                                          | Splice site   | 58.8    |
| AML_102 | <i>SF3B1</i>  | NM_012433:exon15:c.2098A>G:p.K700E                                                                      | Missense      | 52.4    |
| AML_102 | <i>TET2</i>   | NM_001127208:exon6:c.3641G>A:p.R1214Q                                                                   | Missense      | 20.0    |

| Subject | Gene   | Variant                                                                                                                       | Mutation type | VAF [%] |
|---------|--------|-------------------------------------------------------------------------------------------------------------------------------|---------------|---------|
| AML_103 | ASXL1  | NM_015338:exon12:c.1931_1932insGGGT:p.G644fs                                                                                  | InDel         | 23.9    |
| AML_103 | RUNX1  | NM_001754:exon5:c.496C>T:p.R166X                                                                                              | Nonsense      | 42.1    |
| AML_103 | SRSF2  | NM_003016:exon1:c.284C>A:p.P95H                                                                                               | Missense      | 39.5    |
| AML_103 | TET2   | NM_001127208:exon3:c.1937_1938insAGTGG:p.T646fs                                                                               | InDel         | 28.0    |
| AML_103 | TET2   | NM_001127208:exon6:c.3782G>A:p.R1261H                                                                                         | Missense      | 23.7    |
| AML_104 | RUNX1  | NM_001754:exon6:c.508+1G>A,p.?                                                                                                | Splice site   | 36.3    |
| AML_104 | RUNX1  | NM_001754:exon5:c.508G>C:p.G170R                                                                                              | Missense      | 26.8    |
| AML_104 | RUNX1  | NM_001754:exon5:c.422C>A:p.S141X                                                                                              | Nonsense      | 4.3     |
| AML_104 | SF3B1  | NM_012433:exon15:c.2098A>G:p.K700E                                                                                            | Missense      | 40.8    |
| AML_105 | DNMT3A | NM_175629:exon23:c.2645G>A:p.R882H                                                                                            | Missense      | 43.6    |
| AML_105 | KRAS   | NM_033360:exon3:c.176C>G:p.A59G                                                                                               | Missense      | 4.7     |
| AML_105 | NPM1   | NM_002520:exon11:c.859_860insTCTG:p.L287fs                                                                                    | InDel         | 47.0    |
| AML_105 | PTPN11 | NM_002834:exon3:c.182A>G:p.D61G                                                                                               | Missense      | 27.5    |
| AML_105 | PTPN11 | NM_002834:exon3:c.213T>A:p.F71L                                                                                               | Missense      | 6.0     |
| AML_106 | PTPN11 | NM_002834:exon3:c.181G>T:p.D61Y                                                                                               | Missense      | 10.2    |
| AML_106 | TP53   | NM_000546:exon6:c.646G>A:p.V216M                                                                                              | Missense      | 82.6    |
| AML_107 | NPM1   | NM_002520:exon11:c.859_860insTCTG:p.L287fs                                                                                    | InDel         | 20.2    |
| AML_107 | NRAS   | NM_002524:exon2:c.35G>A:p.G12D                                                                                                | Missense      | 3.3     |
| AML_107 | SRSF2  | NM_003016:exon1:c.284C>T:p.P95L                                                                                               | Missense      | 25.6    |
| AML_107 | TET2   | NM_001127208:exon7:c.3852_3854del:p.1284_1285del                                                                              | InDel         | 37.7    |
| AML_107 | TET2   | NM_001127208:exon10:c.4393C>T:p.R1465X                                                                                        | Nonsense      | 46.1    |
| AML_108 | DNMT3A | NM_175629:exon23:c.2678G>C:p.W893S                                                                                            | Missense      | 39.4    |
| AML_108 | FLT3   | NM_004119:exon14:c.1831_1832insTTGATTTTCAGAGAATATGAATATGATCTCAAATGGGAGTTTCCAAGAGAAAATTTAG:p.E611delinsVDFREYEDLKWEFPRENLE     | InDel         | 22.8    |
| AML_108 | NPM1   | NM_002520:exon11:c.859_860insTCTG:p.L287fs                                                                                    | InDel         | 46.3    |
| AML_109 | DNMT3A | NM_175629:exon23:c.2645G>A:p.R882H                                                                                            | Missense      | 44.0    |
| AML_109 | FLT3   | NM_004119:exon14:c.1816_1817insAAAATGAGTACTTCTACGTTGATTTTCAGAGAATATGAATATGATCTCAAATGGGAGTTTC:p.P606delinsQNEYFYVDFREYEDLKWEFP | InDel         | 5.6     |
| AML_109 | FLT3   | NM_004119:exon14:c.1793_1794insCTACGTTGATTTTCAGAGAATATGA:p.E598delinsDYVDFREYE                                                | InDel         | 3.0     |
| AML_109 | FLT3   | NM_004119:exon14:c.1784_1785insCCCTTATTTTCAG:p.R595delinsSPYFR                                                                | InDel         | 2.9     |
| AML_109 | FLT3   | NM_004119:exon14:c.1783_1784insCCTCAGATAATGAGTACTTCTACGTTGATTTCA:p.R595delinsTSDNEYFYVDFR                                     | InDel         | 1.5     |
| AML_109 | KRAS   | NM_033360:exon2:c.35G>A:p.G12D                                                                                                | Missense      | 7.5     |
| AML_109 | NPM1   | NM_002520:exon11:c.859_860insTCTG:p.L287fs                                                                                    | InDel         | 39.3    |
| AML_109 | NRAS   | NM_002524:exon2:c.38G>A:p.G13D                                                                                                | Missense      | 6.1     |
| AML_109 | PTPN11 | NM_002834:exon3:c.205G>A:p.E69K                                                                                               | Missense      | 3.9     |
| AML_109 | WT1    | NM_024426:exon7:c.1140_1141insCCGG:p.S381fs                                                                                   | InDel         | 6.4     |
| AML_110 | ASXL1  | NM_015338:exon12:c.1927dupG:p.G642fs                                                                                          | InDel         | 21.0    |
| AML_110 | PTPN11 | NM_002834:exon13:c.1529A>T:p.Q510L                                                                                            | Missense      | 23.2    |
| AML_110 | RUNX1  | NM_001754:exon7:c.720_733del:p.240_245del                                                                                     | InDel         | 53.0    |
| AML_110 | SRSF2  | NM_003016:exon1:c.284C>T:p.P95L                                                                                               | Missense      | 17.4    |
| AML_110 | STAG2  | NM_001042750:exon5:c.265dupA:p.V88fs                                                                                          | InDel         | 37.8    |
| AML_110 | STAG2  | NM_001042750:exon5:c.269_269delinsAG                                                                                          | InDel         | 28.3    |
| AML_110 | STAG2  | NM_001042750:exon5:c.269T>G:p.M90R                                                                                            | Missense      | 38.5    |

| Subject | Gene          | Variant                                                                                                                                                    | Mutation type | VAF [%] |
|---------|---------------|------------------------------------------------------------------------------------------------------------------------------------------------------------|---------------|---------|
| AML_111 | <i>NPM1</i>   | NM_002520:exon11:c.859_860insTCTG;p.L287fs                                                                                                                 | InDel         | 37.8    |
| AML_111 | <i>PTPN11</i> | NM_002834:exon3:c.179G>T;p.G60V                                                                                                                            | Missense      | 44.2    |
| AML_111 | <i>STAG2</i>  | NM_001042750:exon17:c.1535-3T>A,p.?                                                                                                                        | Splice site   | 47.8    |
| AML_112 | <i>BCOR</i>   | NM_001123385:exon4:c.1555_1559del;p.E519fs                                                                                                                 | InDel         | 80.7    |
| AML_112 | <i>FLT3</i>   | NM_004119:exon14:c.1794_1795insAAGGTGACCGGCTCCTCAGATAATGAGTACTTCTACGTTGATTTTCAGAGAATATGAA:p.Y599delinsKVTGSSDNEYFYVDFREYEY                                 | InDel         | 16.5    |
| AML_112 | <i>NRAS</i>   | NM_002524:exon3:c.176C>A;p.A59D                                                                                                                            | Missense      | 14.1    |
| AML_112 | <i>STAG2</i>  | NM_001042750:exon9:c.705_706insT;p.L235fs                                                                                                                  | InDel         | 79.1    |
| AML_112 | <i>STAG2</i>  | NM_001042750:exon9:c.706_706delinsTG                                                                                                                       | InDel         | 8.9     |
| AML_112 | <i>U2AF1</i>  | NM_001025203:exon2:c.101C>T;p.S34F                                                                                                                         | Missense      | 42.8    |
| AML_113 | <i>ASXL1</i>  | NM_015338:exon12:c.1888_1910del;p.H630fs                                                                                                                   | InDel         | 39.5    |
| AML_113 | <i>KRAS</i>   | NM_033360:exon2:c.64C>A;p.Q22K                                                                                                                             | Missense      | 10.9    |
| AML_113 | <i>SRSF2</i>  | NM_003016:exon1:c.284C>T;p.P95L                                                                                                                            | Missense      | 20.6    |
| AML_113 | <i>TET2</i>   | NM_001127208:exon3:c.1110T>A;p.Y370X                                                                                                                       | Nonsense      | 68.4    |
| AML_114 | <i>DNMT3A</i> | NM_175629:exon23:c.2645G>A;p.R882H                                                                                                                         | Missense      | 48.0    |
| AML_114 | <i>FLT3</i>   | NM_004119:exon14:c.1793_1794insCTTCGAAAGCCAGCTACAGATGGTACAGGTGACCGGCTCCTCAGATAATGAGTACTTCTACGTTGATTTTCAGAGAATATGA:p.E598delinsDFESQLQMVQVTGSSDNEYFYVDFREYE | InDel         | 9.0     |
| AML_114 | <i>NPM1</i>   | NM_002520:exon11:c.859_860insTCTG;p.L287fs                                                                                                                 | InDel         | 43.0    |
| AML_114 | <i>WT1</i>    | NM_024426:exon7:c.1142_1143insAACAAGAGTC;p.S381fs                                                                                                          | InDel         | 25.0    |
| AML_115 | <i>ASXL1</i>  | NM_015338:exon12:c.2077C>T;p.R693X                                                                                                                         | Nonsense      | 16.0    |
| AML_115 | <i>CEBPA</i>  | NM_004364:exon1:c.961_962insC;p.N321fs                                                                                                                     | InDel         | 65.0    |
| AML_115 | <i>CEBPA</i>  | NM_004364:exon1:c.178dupA;p.T60fs                                                                                                                          | InDel         | 34.0    |
| AML_115 | <i>SRSF2</i>  | NM_003016:exon1:c.284C>T;p.P95L                                                                                                                            | Missense      | 19.0    |
| AML_115 | <i>STAG2</i>  | NM_001042750:exon10:c.891C>A;p.Y297X                                                                                                                       | Nonsense      | 94.0    |
| AML_116 | <i>DNMT3A</i> | NM_175629:exon19:c.2196T>G;p.F732L                                                                                                                         | Missense      | 43.6    |
| AML_116 | <i>FLT3</i>   | NM_004119:exon14:c.1808_1809insTCCAGATAATGAGTACTTCTACGTTGATTTTCAGAGAATATGAATATGATCTCAAATG:p.W603delinsCPDNEYFYVDFREYEYDLKW                                 | InDel         | 27.7    |
| AML_116 | <i>NPM1</i>   | NM_002520:exon11:c.860_861insCTGC;p.L287fs                                                                                                                 | InDel         | 33.6    |
| AML_116 | <i>WT1</i>    | NM_024426:exon7:c.1142C>A;p.S381X                                                                                                                          | Nonsense      | 46.1    |
| AML_117 | <i>IDH1</i>   | NM_005896:exon4:c.394C>T;p.R132C                                                                                                                           | Missense      | 18.6    |

**Abbreviations:** VAF, variant allele frequency; InDel, insertion/deletion variant; MDS, myelodysplastic neoplasm; AML, acute myeloid leukemia.

**Supplemental Table 12: Summary statistics of mutations identified in individuals undergoing total hip arthroplasty and patients with MDS or sAML.**

|                                           | <b>THA (n=261)</b> | <b>MDS (n=91)</b> | <b>sAML (n=123)</b> |
|-------------------------------------------|--------------------|-------------------|---------------------|
| Individuals with $\geq 1$ somatic variant | 127/261 (49%)      | 84/91 (92%)       | 117/123 (95%)       |
| Variants per individual (range)           | 0 - 5              | 0 - 9             | 0 - 11              |
| Among individuals with $\geq 1$ variant:  |                    |                   |                     |
| - Median number of variants               | 1                  | 3                 | 4                   |
| - VAF [%] (median, range)                 | 2.7 (1 - 44)       | 19 (1 - 87)       | 37 (0.3 - 99)       |

**Abbreviations:** VAF, variant allele frequency; THA, total hip arthroplasty; MDS, myelodysplastic neoplasm; AML, acute myeloid leukemia.

**Supplemental Table 13: Comparison of *DNMT3A*, *TET2* and *ASXL1* variant properties between CH, MDS and sAML.**

|                                          | <b>CH (n=127)</b> | <b>MDS (n=91)</b> | <b>sAML (n=123)</b> |
|------------------------------------------|-------------------|-------------------|---------------------|
| <i>DNMT3A</i> p.R882 vs. others          | 4/87 (5%)         | 9/28 (32%)        | 14/37 (38%)         |
| <i>TET2</i> InDel or nonsense vs. others | 27/47 (57%)       | 43/62 (69%)       | 27/37 (73%)         |
| <i>ASXL1</i> c.1934dup vs. others        | 3/12 (25%)        | 9/22 (41%)        | 12/34 (35%)         |

**Abbreviations:** InDel, insertion/deletion variant; MDS, myelodysplastic neoplasm; AML, acute myeloid leukemia.

## Supplemental Figures

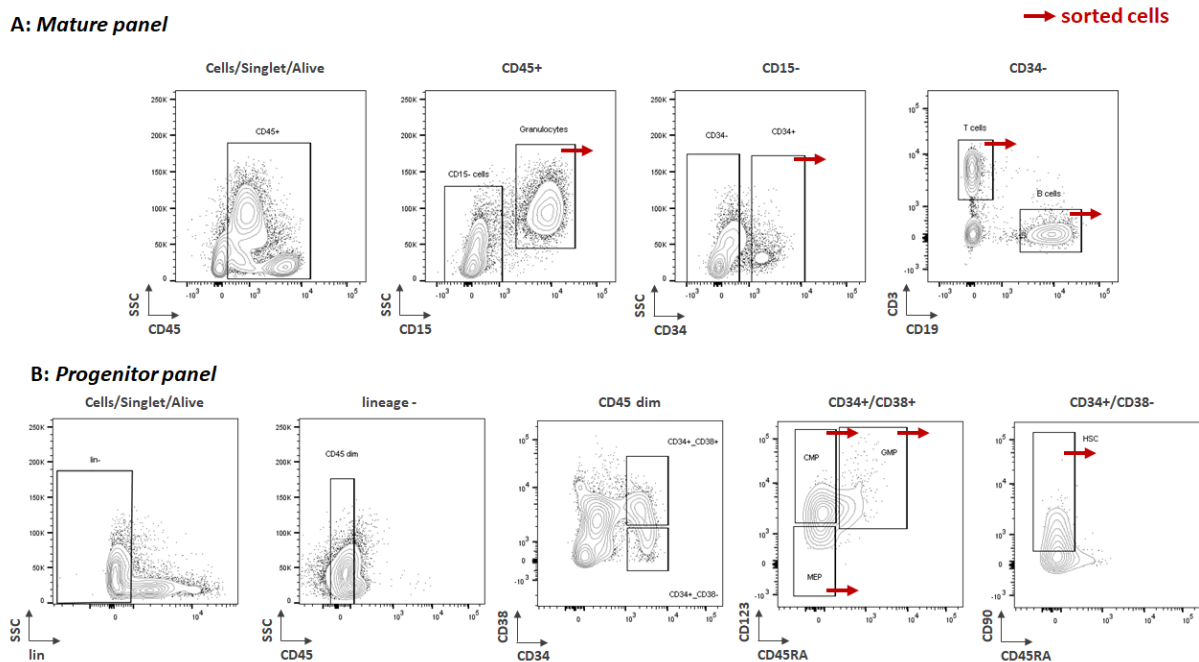

**Supplemental Figure 1: Gating strategy for sorting BM subpopulations from individuals with CH carrying *ASXL1* mutations.**

A: After dead cell exclusion, CD15<sup>+</sup> (granulocytes) cells were sorted, the negative fraction was then used to sort CD34<sup>+</sup> cells and the subsequent CD15<sup>-</sup>CD34<sup>-</sup> fraction was used to sort CD3<sup>+</sup> (T-cells) and CD19<sup>+</sup> (B-cells). B: After dead cell exclusion, lineage negative cells (CD4<sup>-</sup>CD8a<sup>-</sup>CD15<sup>-</sup>CD19<sup>-</sup>CD235a<sup>-</sup>) were selected and subsequently the CD45dim population. The CD34<sup>+</sup>CD38<sup>+</sup> subpopulation was used to sort for CD45RA<sup>-</sup>CD123<sup>+</sup> (CMPs), CD45RA<sup>+</sup>CD123<sup>+</sup> (GMPs) and CD45<sup>-</sup>CD123<sup>-</sup> (MEPs), while the CD34<sup>+</sup>CD38<sup>-</sup> subpopulation was used to sort for CD45RA<sup>-</sup>CD90<sup>+</sup> (HSCs).

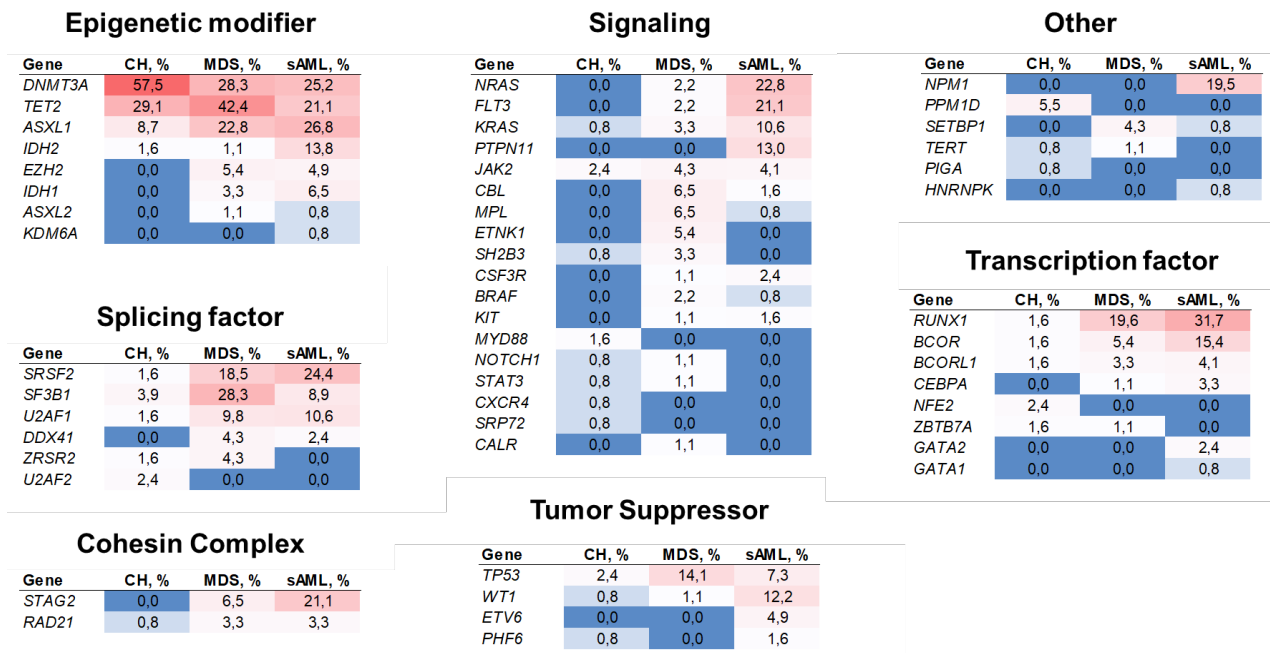

**Supplemental Figure 2: Frequency of mutations in individuals with CH, MDS or sAML, grouped according to functional category**

Classification of genetic variants into functional categories was performed according to Döhner et al., N Engl J Med 2015; 373:1136–1152.

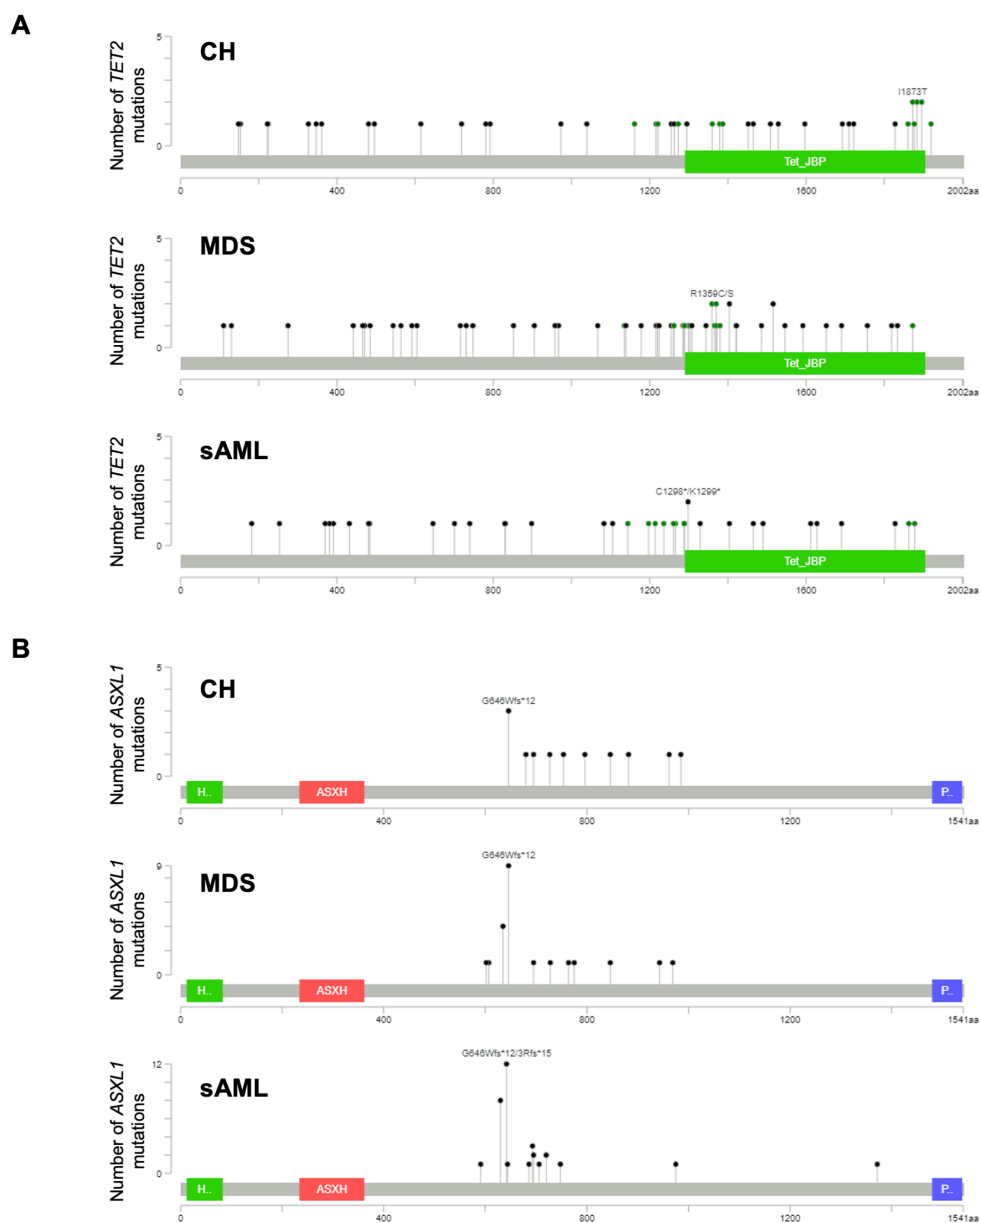

**Supplemental Figure 3: Intra-genic localization of variants in CH, MDS and sAML.**

(A) *TET2* variants; (B) *ASXL1* variants. Green dots indicate missense mutations, black dots indicate InDels, brown dots indicate nonsense mutations. Plots were generated using the MutationMapper tool (Gao et al., *Sci. Signal.* 2013 and Cerami et al., *Cancer Discov.* 2012).
